# Supplementary material for: Theoretical investigations into the bonding and separation properties of non-rigid, partially rigid, and rigid ligands derived from Et-Tol-PTA with trivalent lanthanides and actinides
Source: Royal Society of Chemistry journal article supplement (doi:10.1039/d3cp04717b), 2023-12-12
Supplement: d3cp04717b1.pdf [file d3cp04717b1.pdf]

## Theoretical Investigations into the Bonding and Separation Properties of Non-rigid, Partially Rigid, and Rigid Ligands Derived from Et-Tol-PTA with Trivalent Lanthanides and Actinides

Shouqiang Wu<sup>1</sup>, An Yong Li<sup>1\*</sup>

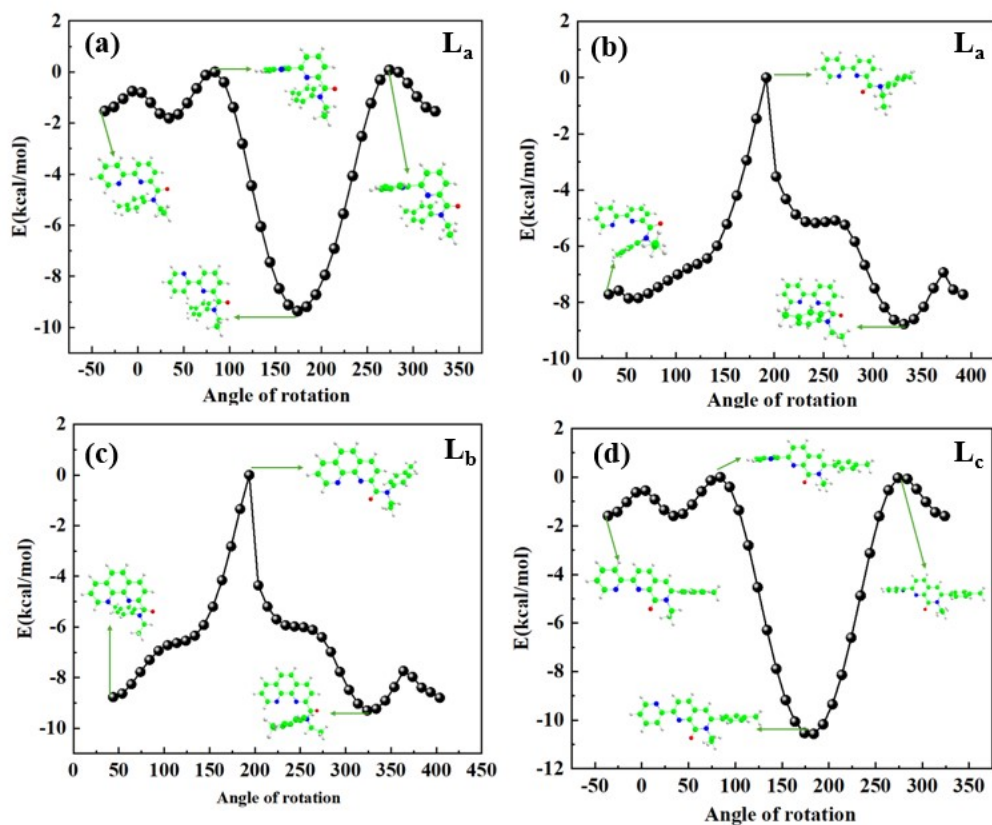

**Figure S1** The potential energy curve of the  $L_a$ - $L_c$  rotating around the selected C-C single bonds with PBE0/6-311G\* levels (The  $L_a$  ligand possesses two C-C single bonds whose rotation changes the relative conformation of the  $N_1$ ,  $N_2$  and O donor atoms, we conducted potential energy curve scans for each of these two bonds, (a) and (b))

---

<sup>1</sup> School of Chemistry and Chemical Engineering, Southwest University, Chongqing 400715, P.R.China

Corresponding author: An Yong Li

E-mail: [aylifnsy@swu.edu.cn](mailto:aylifnsy@swu.edu.cn), [ayli001@swu.edu.cn](mailto:ayli001@swu.edu.cn)

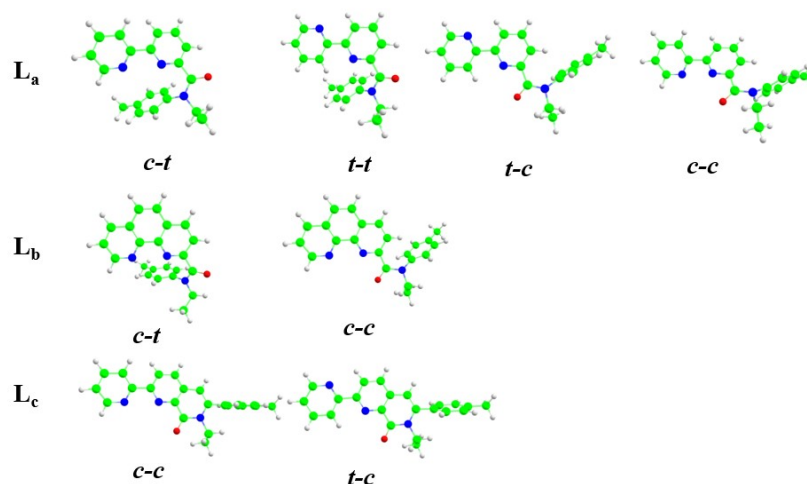

**Figure S2** The cis-conformation ( $c$ ) and trans-conformation ( $t$ ) of the  $L_a$ - $L_c$  ligand.

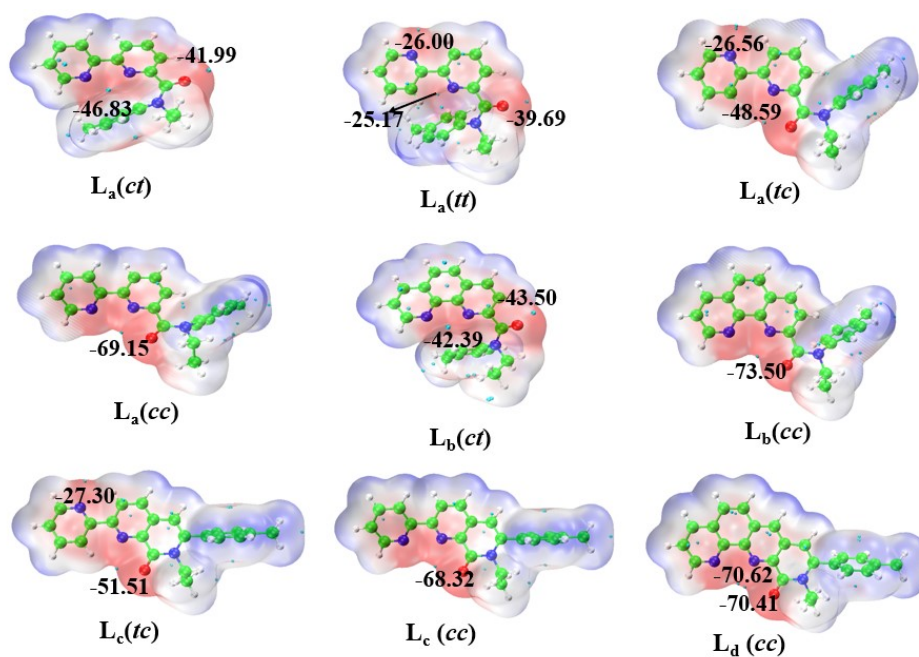

**Figure S3** The electrostatic potential (ESP) diagrams for the cis-conformation ( $c$ ) and trans-conformation ( $t$ ) of the  $L_a$ - $L_d$  ligand.

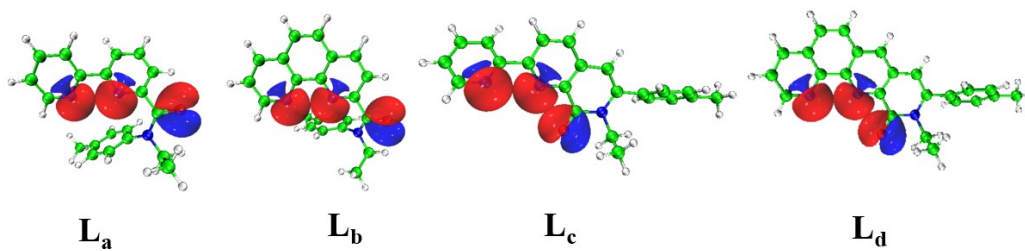

Figure S4 The LMO (Localized Molecular Orbital) orbitals of ligands.

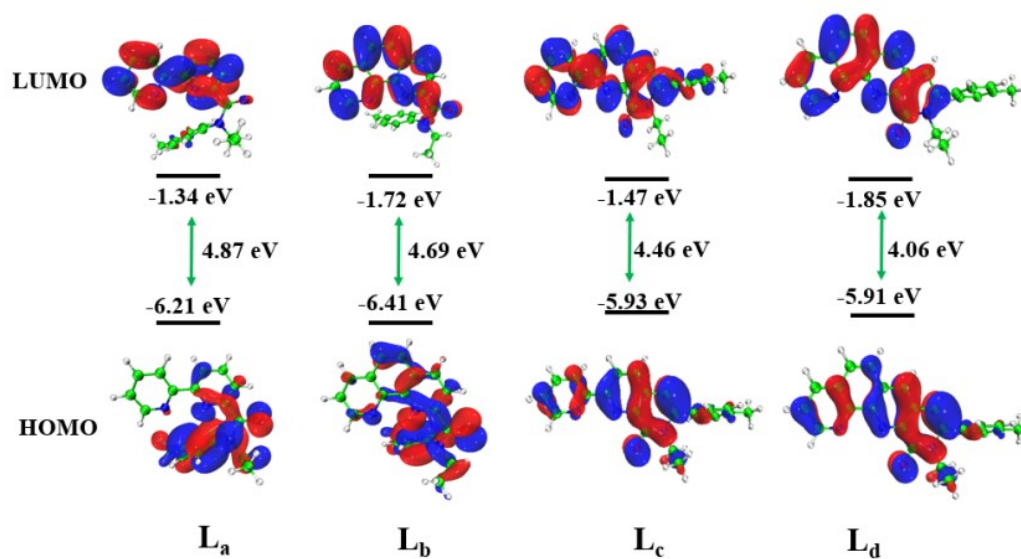

Figure S5 HOMO-LUMO orbital energy level diagram of ligands

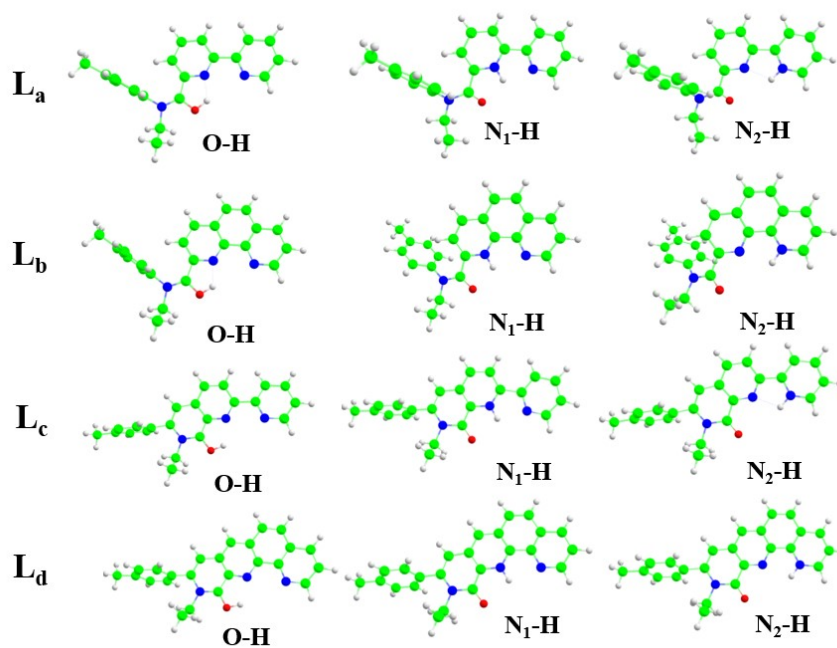

Figure S6 The protonation structural of ligands

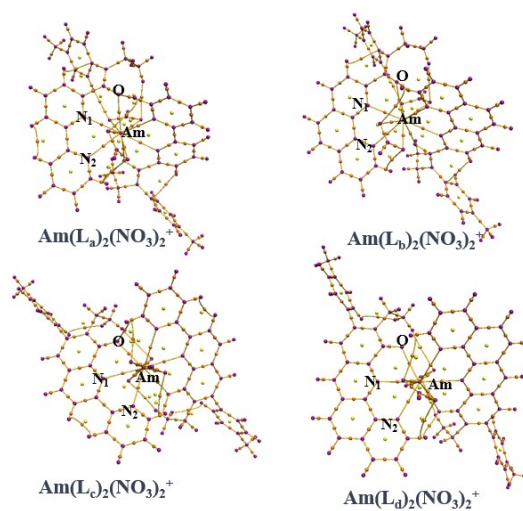

Figure S7 molecular graphs of  $Am(L)_2(NO_3)_2^+$  complexes (Yellow represents the ring critical point, while yellow-brown represents the bond critical point)

Table S1 Natural atomic charges and Mulliken charges of N<sub>1</sub>,N<sub>2</sub>,O in ligands

| Ligands        | Natural atomic charges |                |         | Mulliken charges |                |         |
|----------------|------------------------|----------------|---------|------------------|----------------|---------|
|                | N <sub>1</sub>         | N <sub>2</sub> | O       | N <sub>1</sub>   | N <sub>2</sub> | O       |
| L <sub>a</sub> | -0.4315                | -0.4320        | -0.6334 | -0.3122          | -0.3343        | -0.3813 |
| L <sub>b</sub> | -0.4297                | -0.4338        | -0.6292 | -0.3438          | -0.3746        | -0.3804 |
| L <sub>c</sub> | -0.3873                | -0.4283        | -0.5950 | -0.3115          | -0.3291        | -0.3484 |
| L <sub>d</sub> | -0.3750                | -0.4166        | -0.5888 | -0.3218          | -0.3393        | -0.3432 |

Table S2 Bond lengths of O-M,N<sub>1,2</sub>-M and average N<sub>ave</sub>-M with several functionals method

| BP86                                                                          | O-M    | N <sub>1</sub> -M | N <sub>2</sub> -M | N <sub>ave</sub> -M |
|-------------------------------------------------------------------------------|--------|-------------------|-------------------|---------------------|
| Am(L <sub>b</sub> ) <sub>2</sub> (NO <sub>3</sub> ) <sub>2</sub> <sup>+</sup> | 2.5054 | 2.6407            | 2.6634            | 2.6520              |
| Cm(L <sub>b</sub> ) <sub>2</sub> (NO <sub>3</sub> ) <sub>2</sub> <sup>+</sup> | 2.4975 | 2.6830            | 2.6868            | 2.6849              |
| Eu(L <sub>b</sub> ) <sub>2</sub> (NO <sub>3</sub> ) <sub>2</sub> <sup>+</sup> | 2.5086 | 2.6858            | 2.6980            | 2.6919              |
| TPSSH                                                                         | O-M    | N <sub>1</sub> -M | N <sub>2</sub> -M | N <sub>ave</sub> -M |
| Am(L <sub>b</sub> ) <sub>2</sub> (NO <sub>3</sub> ) <sub>2</sub> <sup>+</sup> | 2.4857 | 2.6300            | 2.6483            | 2.6392              |
| Cm(L <sub>b</sub> ) <sub>2</sub> (NO <sub>3</sub> ) <sub>2</sub> <sup>+</sup> | 2.4750 | 2.6650            | 2.6720            | 2.6685              |
| Eu(L <sub>b</sub> ) <sub>2</sub> (NO <sub>3</sub> ) <sub>2</sub> <sup>+</sup> | 2.4625 | 2.6348            | 2.6605            | 2.6477              |
| b3lyp                                                                         | O-M    | N <sub>1</sub> -M | N <sub>2</sub> -M | N <sub>ave</sub> -M |
| Am(L <sub>b</sub> ) <sub>2</sub> (NO <sub>3</sub> ) <sub>2</sub> <sup>+</sup> | 2.5144 | 2.6828            | 2.6970            | 2.6899              |
| Cm(L <sub>b</sub> ) <sub>2</sub> (NO <sub>3</sub> ) <sub>2</sub> <sup>+</sup> | 2.4996 | 2.7118            | 2.7082            | 2.7100              |
| Eu(L <sub>b</sub> ) <sub>2</sub> (NO <sub>3</sub> ) <sub>2</sub> <sup>+</sup> | 2.4681 | 2.6687            | 2.6915            | 2.6801              |
| PBE0                                                                          | O-M    | N <sub>1</sub> -M | N <sub>2</sub> -M | N <sub>ave</sub> -M |
| Am(L <sub>b</sub> ) <sub>2</sub> (NO <sub>3</sub> ) <sub>2</sub> <sup>+</sup> | 2.4909 | 2.6403            | 2.6565            | 2.6484              |
| Cm(L <sub>b</sub> ) <sub>2</sub> (NO <sub>3</sub> ) <sub>2</sub> <sup>+</sup> | 2.4776 | 2.6708            | 2.6672            | 2.6690              |
| Eu(L <sub>b</sub> ) <sub>2</sub> (NO <sub>3</sub> ) <sub>2</sub> <sup>+</sup> | 2.4448 | 2.6298            | 2.6524            | 2.6411              |
| M06-2X                                                                        | O-M    | N <sub>1</sub> -M | N <sub>2</sub> -M | N <sub>ave</sub> -M |
| Am(L <sub>b</sub> ) <sub>2</sub> (NO <sub>3</sub> ) <sub>2</sub> <sup>+</sup> | 2.5112 | 2.6450            | 2.6680            | 2.6565              |
| Cm(L <sub>b</sub> ) <sub>2</sub> (NO <sub>3</sub> ) <sub>2</sub> <sup>+</sup> | 2.4736 | 2.6570            | 2.6504            | 2.6537              |
| Eu(L <sub>b</sub> ) <sub>2</sub> (NO <sub>3</sub> ) <sub>2</sub> <sup>+</sup> | 2.4227 | 2.6163            | 2.6377            | 2.6270              |

Table S3 Bond lengths of O-M,N<sub>1,2</sub>-M and average N<sub>ave</sub>-M with PBE0/6-311G\*-RECP level.

| Complexes                                                                     | O-M    | N <sub>1</sub> -M | N <sub>2</sub> -M | N <sub>ave</sub> -M |
|-------------------------------------------------------------------------------|--------|-------------------|-------------------|---------------------|
| Am(L <sub>a</sub> ) <sub>2</sub> (NO <sub>3</sub> ) <sub>2</sub> <sup>+</sup> | 2.4759 | 2.6549            | 2.6489            | 2.6519              |
| Cm(L <sub>a</sub> ) <sub>2</sub> (NO <sub>3</sub> ) <sub>2</sub> <sup>+</sup> | 2.4636 | 2.6855            | 2.6579            | 2.6717              |
| Eu(L <sub>a</sub> ) <sub>2</sub> (NO <sub>3</sub> ) <sub>2</sub> <sup>+</sup> | 2.4279 | 2.6513            | 2.6415            | 2.6464              |
| Am(L <sub>b</sub> ) <sub>2</sub> (NO <sub>3</sub> ) <sub>2</sub> <sup>+</sup> | 2.4909 | 2.6403            | 2.6565            | 2.6484              |
| Cm(L <sub>b</sub> ) <sub>2</sub> (NO <sub>3</sub> ) <sub>2</sub> <sup>+</sup> | 2.4776 | 2.6708            | 2.6672            | 2.6690              |
| Eu(L <sub>b</sub> ) <sub>2</sub> (NO <sub>3</sub> ) <sub>2</sub> <sup>+</sup> | 2.4448 | 2.6298            | 2.6524            | 2.6411              |
| Am(L <sub>c</sub> ) <sub>2</sub> (NO <sub>3</sub> ) <sub>2</sub> <sup>+</sup> | 2.4982 | 2.6314            | 2.6688            | 2.6501              |
| Cm(L <sub>c</sub> ) <sub>2</sub> (NO <sub>3</sub> ) <sub>2</sub> <sup>+</sup> | 2.4889 | 2.6640            | 2.6803            | 2.6722              |
| Eu(L <sub>c</sub> ) <sub>2</sub> (NO <sub>3</sub> ) <sub>2</sub> <sup>+</sup> | 2.4587 | 2.6216            | 2.6661            | 2.6438              |

|                                                                               |        |        |        |        |
|-------------------------------------------------------------------------------|--------|--------|--------|--------|
| Am(L <sub>d</sub> ) <sub>2</sub> (NO <sub>3</sub> ) <sub>2</sub> <sup>+</sup> | 2.5190 | 2.6216 | 2.6818 | 2.6517 |
| Cm(L <sub>d</sub> ) <sub>2</sub> (NO <sub>3</sub> ) <sub>2</sub> <sup>+</sup> | 2.5094 | 2.6527 | 2.6958 | 2.6743 |
| Eu(L <sub>d</sub> ) <sub>2</sub> (NO <sub>3</sub> ) <sub>2</sub> <sup>+</sup> | 2.4813 | 2.6316 | 2.6760 | 2.6538 |

Table S4  $\angle N_1MN_2$  and  $\angle N_1MO$  bond angles in Am(L)<sub>2</sub>(NO<sub>3</sub>)<sub>2</sub><sup>+</sup> complexes with PBE0/6-311G\*-RECP level.

|                                                                               | $\angle N_1MN_2$ | $\angle N_1MO$ |
|-------------------------------------------------------------------------------|------------------|----------------|
| Am(L <sub>a</sub> ) <sub>2</sub> (NO <sub>3</sub> ) <sub>2</sub> <sup>+</sup> | 61.25            | 122.25         |
| Cm(L <sub>a</sub> ) <sub>2</sub> (NO <sub>3</sub> ) <sub>2</sub> <sup>+</sup> | 60.64            | 121.22         |
| Eu(L <sub>a</sub> ) <sub>2</sub> (NO <sub>3</sub> ) <sub>2</sub> <sup>+</sup> | 61.19            | 122.33         |
| Am(L <sub>b</sub> ) <sub>2</sub> (NO <sub>3</sub> ) <sub>2</sub> <sup>+</sup> | 61.78            | 122.29         |
| Cm(L <sub>b</sub> ) <sub>2</sub> (NO <sub>3</sub> ) <sub>2</sub> <sup>+</sup> | 61.15            | 121.35         |
| Eu(L <sub>b</sub> ) <sub>2</sub> (NO <sub>3</sub> ) <sub>2</sub> <sup>+</sup> | 61.71            | 122.69         |
| Am(L <sub>c</sub> ) <sub>2</sub> (NO <sub>3</sub> ) <sub>2</sub> <sup>+</sup> | 60.50            | 123.12         |
| Cm(L <sub>c</sub> ) <sub>2</sub> (NO <sub>3</sub> ) <sub>2</sub> <sup>+</sup> | 59.89            | 122.02         |
| Eu(L <sub>c</sub> ) <sub>2</sub> (NO <sub>3</sub> ) <sub>2</sub> <sup>+</sup> | 60.40            | 123.37         |
| Am(L <sub>d</sub> ) <sub>2</sub> (NO <sub>3</sub> ) <sub>2</sub> <sup>+</sup> | 61.16            | 123.32         |
| Cm(L <sub>d</sub> ) <sub>2</sub> (NO <sub>3</sub> ) <sub>2</sub> <sup>+</sup> | 60.48            | 122.16         |
| Eu(L <sub>d</sub> ) <sub>2</sub> (NO <sub>3</sub> ) <sub>2</sub> <sup>+</sup> | 60.71            | 122.76         |

Table S5 The averaged electron density ( $\rho$ ), Laplacian ( $\nabla^2\rho$ ), local electron energy density (H(r)) and the ratio between the absolute value of potential energy density(V) and Lagrangian kinetic energy(G) at the N<sub>1</sub>-M, N<sub>2</sub>-M and O-M at BCPs, for the M(L)<sub>2</sub>(NO<sub>3</sub>)<sub>2</sub><sup>+</sup> complexes calculated by the def-TZVP method

| Am(L <sub>a</sub> ) <sub>2</sub> (NO <sub>3</sub> ) <sub>2</sub> <sup>+</sup> | $\rho$ | $\nabla^2\rho$ | H(r)*10 <sup>2</sup> | V /G   | $\delta$ |
|-------------------------------------------------------------------------------|--------|----------------|----------------------|--------|----------|
| O-Am                                                                          | 0.0490 | 0.1900         | -0.4969              | 1.0947 | 0.2543   |
| N <sub>1</sub> -Am                                                            | 0.0392 | 0.1181         | -0.3558              | 1.1075 | 0.2160   |
| N <sub>2</sub> -Am                                                            | 0.0409 | 0.1229         | -0.4240              | 1.1212 | 0.2313   |
| Cm(L <sub>a</sub> ) <sub>2</sub> (NO <sub>3</sub> ) <sub>2</sub> <sup>+</sup> | $\rho$ | $\nabla^2\rho$ | H(r)*10 <sup>2</sup> | V /G   | $\delta$ |
| O-Cm                                                                          | 0.0495 | 0.1912         | -0.4862              | 1.0923 | 0.2487   |
| N <sub>1</sub> -Cm                                                            | 0.0368 | 0.1123         | -0.2998              | 1.0965 | 0.1863   |
| N <sub>2</sub> -Cm                                                            | 0.0396 | 0.1172         | -0.3784              | 1.1143 | 0.2172   |
| Eu(L <sub>a</sub> ) <sub>2</sub> (NO <sub>3</sub> ) <sub>2</sub> <sup>+</sup> | $\rho$ | $\nabla^2\rho$ | H(r)*10 <sup>2</sup> | V /G   | $\delta$ |
| O-Eu                                                                          | 0.0475 | 0.1905         | -0.2869              | 1.0568 | 0.2228   |
| N <sub>1</sub> -Eu                                                            | 0.0346 | 0.1110         | -0.1223              | 1.0422 | 0.1734   |
| N <sub>2</sub> -Eu                                                            | 0.0361 | 0.1134         | -0.1601              | 1.0534 | 0.1881   |
| Am(L <sub>b</sub> ) <sub>2</sub> (NO <sub>3</sub> ) <sub>2</sub> <sup>+</sup> | $\rho$ | $\nabla^2\rho$ | H(r)*10 <sup>2</sup> | V /G   | $\delta$ |
| O-Am                                                                          | 0.0474 | 0.1838         | -0.4482              | 1.0889 | 0.2469   |
| N <sub>1</sub> -Am                                                            | 0.0407 | 0.1217         | -0.3946              | 1.1148 | 0.2236   |
| N <sub>2</sub> -Am                                                            | 0.0402 | 0.1214         | -0.4043              | 1.1176 | 0.2276   |

|                                                                               |        |                |                      |        |          |
|-------------------------------------------------------------------------------|--------|----------------|----------------------|--------|----------|
| Cm(L <sub>b</sub> ) <sub>2</sub> (NO <sub>3</sub> ) <sub>2</sub> <sup>+</sup> | $\rho$ | $\nabla^2\rho$ | H(r)*10 <sup>2</sup> | V /G   | $\delta$ |
| O-Cm                                                                          | 0.0479 | 0.1851         | -0.4392              | 1.0867 | 0.2416   |
| N <sub>1</sub> -Cm                                                            | 0.0381 | 0.1159         | -0.3367              | 1.1041 | 0.1928   |
| N <sub>2</sub> -Cm                                                            | 0.0388 | 0.1152         | -0.3562              | 1.1101 | 0.2134   |
| Eu(L <sub>b</sub> ) <sub>2</sub> (NO <sub>3</sub> ) <sub>2</sub> <sup>+</sup> | $\rho$ | $\nabla^2\rho$ | H(r)*10 <sup>2</sup> | V /G   | $\delta$ |
| O-Eu                                                                          | 0.0456 | 0.1832         | -0.2354              | 1.0489 | 0.2152   |
| N <sub>1</sub> -Eu                                                            | 0.0365 | 0.1156         | -0.1671              | 1.0547 | 0.1823   |
| N <sub>2</sub> -Eu                                                            | 0.0353 | 0.1112         | -0.1414              | 1.0484 | 0.1838   |
| Am(L <sub>c</sub> ) <sub>2</sub> (NO <sub>3</sub> ) <sub>2</sub> <sup>+</sup> | $\rho$ | $\nabla^2\rho$ | H(r)*10 <sup>2</sup> | V /G   | $\delta$ |
| O-Am                                                                          | 0.0472 | 0.1806         | -0.4583              | 1.0922 | 0.2491   |
| N <sub>1</sub> -Am                                                            | 0.0412 | 0.1239         | -0.3993              | 1.1142 | 0.2390   |
| N <sub>2</sub> -Am                                                            | 0.0391 | 0.1183         | -0.3697              | 1.1111 | 0.2221   |
| Cm(L <sub>c</sub> ) <sub>2</sub> (NO <sub>3</sub> ) <sub>2</sub> <sup>+</sup> | $\rho$ | $\nabla^2\rho$ | H(r)*10 <sup>2</sup> | V /G   | $\delta$ |
| O-Cm                                                                          | 0.0474 | 0.1798         | -0.4409              | 1.0893 | 0.2420   |
| N <sub>1</sub> -Cm                                                            | 0.0385 | 0.1176         | -0.3428              | 1.1044 | 0.1938   |
| N <sub>2</sub> -Cm                                                            | 0.0376 | 0.1121         | -0.3202              | 1.1026 | 0.2073   |
| Eu(L <sub>c</sub> ) <sub>2</sub> (NO <sub>3</sub> ) <sub>2</sub> <sup>+</sup> | $\rho$ | $\nabla^2\rho$ | H(r)*10 <sup>2</sup> | V /G   | $\delta$ |
| O-Eu                                                                          | 0.0449 | 0.1772         | -0.2322              | 1.0498 | 0.2147   |
| N <sub>1</sub> -Eu                                                            | 0.0370 | 0.1176         | -0.1752              | 1.0562 | 0.1845   |
| N <sub>2</sub> -Eu                                                            | 0.0341 | 0.1081         | -0.1097              | 1.0390 | 0.1786   |
| Am(L <sub>d</sub> ) <sub>2</sub> (NO <sub>3</sub> ) <sub>2</sub> <sup>+</sup> | $\rho$ | $\nabla^2\rho$ | H(r)*10 <sup>2</sup> | V /G   | $\delta$ |
| O-Am                                                                          | 0.0450 | 0.1724         | -0.3887              | 1.0827 | 0.2379   |
| N <sub>1</sub> -Am                                                            | 0.0421 | 0.1265         | -0.4284              | 1.1193 | 0.2304   |
| N <sub>2</sub> -Am                                                            | 0.0380 | 0.1154         | -0.3388              | 1.1051 | 0.2172   |
| Cm(L <sub>d</sub> ) <sub>2</sub> (NO <sub>3</sub> ) <sub>2</sub> <sup>+</sup> | $\rho$ | $\nabla^2\rho$ | H(r)*10 <sup>2</sup> | V /G   | $\delta$ |
| O-Cm                                                                          | 0.0451 | 0.1715         | -0.3732              | 1.0801 | 0.2315   |
| N <sub>1</sub> -Cm                                                            | 0.0396 | 0.1204         | -0.3718              | 1.1100 | 0.1993   |
| N <sub>2</sub> -Cm                                                            | 0.0363 | 0.1086         | -0.2866              | 1.0954 | 0.2016   |
| Eu(L <sub>d</sub> ) <sub>2</sub> (NO <sub>3</sub> ) <sub>2</sub> <sup>+</sup> | $\rho$ | $\nabla^2\rho$ | H(r)*10 <sup>2</sup> | V /G   | $\delta$ |
| O-Eu                                                                          | 0.0424 | 0.1668         | -0.1643              | 1.0379 | 0.2052   |
| N <sub>1</sub> -Eu                                                            | 0.0364 | 0.1197         | -0.1509              | 1.0480 | 0.1720   |
| N <sub>2</sub> -Eu                                                            | 0.0334 | 0.1052         | -0.0984              | 1.0360 | 0.1742   |

**Table S6** The averaged electron density ( $\rho$ ), Laplacian ( $\nabla^2\rho$ ), local electron energy density (H(r)) and the ratio between the absolute value of potential energy density(V) and Lagrangian kinetic energy(G) at the N<sub>1</sub>-M, N<sub>2</sub>-M and O-M at BCPs, for the M(L)<sub>2</sub>(NO<sub>3</sub>)<sub>2</sub><sup>+</sup> complexes calculated by the ZORA method

|                                                                               |        |                |                      |        |          |
|-------------------------------------------------------------------------------|--------|----------------|----------------------|--------|----------|
| Am(L <sub>a</sub> ) <sub>2</sub> (NO <sub>3</sub> ) <sub>2</sub> <sup>+</sup> | $\rho$ | $\nabla^2\rho$ | H(r)*10 <sup>2</sup> | V /G   | $\delta$ |
| O-Am                                                                          | 0.0485 | 0.2026         | -0.2101              | 1.0398 | 0.2566   |
| N <sub>1</sub> -Am                                                            | 0.0385 | 0.1252         | -0.1586              | 1.0482 | 0.2193   |
| N <sub>2</sub> -Am                                                            | 0.0404 | 0.1298         | -0.2186              | 1.0631 | 0.2342   |
| Cm(L <sub>a</sub> ) <sub>2</sub> (NO <sub>3</sub> ) <sub>2</sub> <sup>+</sup> | $\rho$ | $\nabla^2\rho$ | H(r)*10 <sup>2</sup> | V /G   | $\delta$ |
| O-Cm                                                                          | 0.0489 | 0.2055         | -0.1867              | 1.0351 | 0.2515   |
| N <sub>1</sub> -Cm                                                            | 0.0362 | 0.1181         | -0.1263              | 1.0410 | 0.1895   |

|                                                                               |        |                  |                      |        |        |
|-------------------------------------------------------------------------------|--------|------------------|----------------------|--------|--------|
| N <sub>2</sub> -Cm                                                            | 0.0390 | 0.1240           | -0.1892              | 1.0575 | 0.2210 |
| Eu(L <sub>a</sub> ) <sub>2</sub> (NO <sub>3</sub> ) <sub>2</sub> <sup>+</sup> | ρ      | ∇ <sup>2</sup> ρ | H(r)*10 <sup>2</sup> | V /G   | δ      |
| O-Eu                                                                          | 0.0469 | 0.2011           | -0.0236              | 1.0047 | 0.2253 |
| N <sub>1</sub> -Eu                                                            | 0.0341 | 0.1185           | 0.0291               | 0.9901 | 0.1676 |
| N <sub>2</sub> -Eu                                                            | 0.0357 | 0.1165           | -0.0315              | 1.0107 | 0.1890 |
| Am(L <sub>b</sub> ) <sub>2</sub> (NO <sub>3</sub> ) <sub>2</sub> <sup>+</sup> | ρ      | ∇ <sup>2</sup> ρ | H(r)*10 <sup>2</sup> | V /G   | δ      |
| O-Am                                                                          | 0.0468 | 0.1956           | -0.1764              | 1.0348 | 0.2492 |
| N <sub>1</sub> -Am                                                            | 0.0399 | 0.1293           | -0.1864              | 1.0545 | 0.2272 |
| N <sub>2</sub> -Am                                                            | 0.0397 | 0.1281           | -0.2052              | 1.0602 | 0.2307 |
| Cm(L <sub>b</sub> ) <sub>2</sub> (NO <sub>3</sub> ) <sub>2</sub> <sup>+</sup> | ρ      | ∇ <sup>2</sup> ρ | H(r)*10 <sup>2</sup> | V /G   | δ      |
| O-Cm                                                                          | 0.0473 | 0.1986           | -0.1538              | 1.0300 | 0.2444 |
| N <sub>1</sub> -Cm                                                            | 0.0375 | 0.1224           | -0.1492              | 1.0465 | 0.1960 |
| N <sub>2</sub> -Cm                                                            | 0.0383 | 0.1217           | -0.1748              | 1.0543 | 0.2169 |
| Eu(L <sub>b</sub> ) <sub>2</sub> (NO <sub>3</sub> ) <sub>2</sub> <sup>+</sup> | ρ      | ∇ <sup>2</sup> ρ | H(r)*10 <sup>2</sup> | V /G   | δ      |
| O-Eu                                                                          | 0.0449 | 0.1935           | 0.0168               | 0.9965 | 0.2167 |
| N <sub>1</sub> -Eu                                                            | 0.0359 | 0.1205           | -0.0201              | 1.0066 | 0.1842 |
| N <sub>2</sub> -Eu                                                            | 0.0348 | 0.1146           | -0.0161              | 1.0056 | 0.1858 |
| Am(L <sub>c</sub> ) <sub>2</sub> (NO <sub>3</sub> ) <sub>2</sub> <sup>+</sup> | ρ      | ∇ <sup>2</sup> ρ | H(r)*10 <sup>2</sup> | V /G   | δ      |
| O-Am                                                                          | 0.0467 | 0.1920           | -0.1892              | 1.0379 | 0.2513 |
| N <sub>1</sub> -Am                                                            | 0.0404 | 0.1318           | -0.1842              | 1.0530 | 0.2298 |
| N <sub>2</sub> -Am                                                            | 0.0385 | 0.1243           | -0.1830              | 1.0556 | 0.2252 |
| Cm(L <sub>c</sub> ) <sub>2</sub> (NO <sub>3</sub> ) <sub>2</sub> <sup>+</sup> | ρ      | ∇ <sup>2</sup> ρ | H(r)*10 <sup>2</sup> | V /G   | δ      |
| O-Cm                                                                          | 0.0468 | 0.1927           | -0.1630              | 1.0327 | 0.2446 |
| N <sub>1</sub> -Cm                                                            | 0.0379 | 0.1245           | -0.1483              | 1.0676 | 0.1971 |
| N <sub>2</sub> -Cm                                                            | 0.0370 | 0.1179           | -0.1523              | 1.0492 | 0.2107 |
| Eu(L <sub>c</sub> ) <sub>2</sub> (NO <sub>3</sub> ) <sub>2</sub> <sup>+</sup> | ρ      | ∇ <sup>2</sup> ρ | H(r)*10 <sup>2</sup> | V /G   | δ      |
| O-Eu                                                                          | 0.0442 | 0.0938           | 0.0142               | 0.9970 | 0.2157 |
| N <sub>1</sub> -Eu                                                            | 0.0364 | 0.1227           | -0.0238              | 1.0077 | 0.1869 |
| N <sub>2</sub> -Eu                                                            | 0.0336 | 0.1109           | 0.0056               | 0.9980 | 0.1809 |
| Am(L <sub>d</sub> ) <sub>2</sub> (NO <sub>3</sub> ) <sub>2</sub> <sup>+</sup> | ρ      | ∇ <sup>2</sup> ρ | H(r)*10 <sup>2</sup> | V /G   | δ      |
| O-Am                                                                          | 0.0444 | 0.1828           | -0.1392              | 1.0296 | 0.2400 |
| N <sub>1</sub> -Am                                                            | 0.0414 | 0.1348           | -0.2063              | 1.0577 | 0.2342 |
| N <sub>2</sub> -Am                                                            | 0.0375 | 0.1210           | -0.1629              | 1.0511 | 0.2203 |
| Cm(L <sub>d</sub> ) <sub>2</sub> (NO <sub>3</sub> ) <sub>2</sub> <sup>+</sup> | ρ      | ∇ <sup>2</sup> ρ | H(r)*10 <sup>2</sup> | V /G   | δ      |
| O-Cm                                                                          | 0.0446 | 0.1832           | -0.1159              | 1.0247 | 0.2341 |
| N <sub>1</sub> -Cm                                                            | 0.0390 | 0.1278           | -0.1669              | 1.0496 | 0.2027 |
| N <sub>2</sub> -Cm                                                            | 0.0358 | 0.1139           | -0.1318              | 1.0442 | 0.2050 |
| Eu(L <sub>d</sub> ) <sub>2</sub> (NO <sub>3</sub> ) <sub>2</sub> <sup>+</sup> | ρ      | ∇ <sup>2</sup> ρ | H(r)*10 <sup>2</sup> | V /G   | δ      |
| O-Eu                                                                          | 0.0417 | 0.1761           | 0.0579               | 0.9867 | 0.2061 |
| N <sub>1</sub> -Eu                                                            | 0.0356 | 0.1200           | -0.0128              | 1.0043 | 0.1843 |
| N <sub>2</sub> -Eu                                                            | 0.0329 | 0.1086           | 0.0148               | 0.9945 | 0.1778 |



**Table S7** Charge decomposition analysis of  $\alpha$ ,  $\beta$ -spin orbitals and  $(\alpha+\beta)$ -spin orbitals for  $M(L_a)_2(NO_3)_2^+$ ,  $M(L_c)_2(NO_3)_2^+$  and  $M(L_d)_2(NO_3)_2^+$  complexes with PBE0/def-TZVP level.

| Complexes             | Spin orbital           | d      | b       | b-d    |
|-----------------------|------------------------|--------|---------|--------|
| $Am(L_a)_2(NO_3)_2^+$ | $\alpha$ -spin         | 0.2107 | -0.0315 | 0.2422 |
|                       | $\beta$ -spin          | 0.1848 | -0.0427 | 0.2275 |
|                       | $(\alpha+\beta)$ -spin | 0.3955 | -0.0742 | 0.4696 |
| $Cm(L_a)_2(NO_3)_2^+$ | $\alpha$ -spin         | 0.2075 | -0.0332 | 0.2407 |
|                       | $\beta$ -spin          | 0.1880 | -0.0402 | 0.2282 |
|                       | $(\alpha+\beta)$ -spin | 0.3955 | -0.0735 | 0.4690 |
| $Eu(L_a)_2(NO_3)_2^+$ | $\alpha$ -spin         | 0.1597 | -0.0652 | 0.4369 |
|                       | $\beta$ -spin          | 0.1397 | -0.0723 | 0.2120 |
|                       | $(\alpha+\beta)$ -spin | 0.2993 | -0.1375 | 0.4368 |
| $Am(L_c)_2(NO_3)_2^+$ | $\alpha$ -spin         | 0.2077 | -0.0380 | 0.2457 |
|                       | $\beta$ -spin          | 0.1810 | -0.0487 | 0.2297 |
|                       | $(\alpha+\beta)$ -spin | 0.3887 | -0.0887 | 0.4754 |
| $Cm(L_c)_2(NO_3)_2^+$ | $\alpha$ -spin         | 0.2035 | -0.0416 | 0.2451 |
|                       | $\beta$ -spin          | 0.1839 | -0.0476 | 0.2315 |
|                       | $(\alpha+\beta)$ -spin | 0.3875 | -0.0891 | 0.4766 |
| $Eu(L_c)_2(NO_3)_2^+$ | $\alpha$ -spin         | 0.1531 | -0.0716 | 0.2247 |
|                       | $\beta$ -spin          | 0.1340 | -0.0786 | 0.2246 |
|                       | $(\alpha+\beta)$ -spin | 0.2871 | -0.1502 | 0.4373 |
| $Am(L_d)_2(NO_3)_2^+$ | $\alpha$ -spin         | 0.2074 | -0.0415 | 0.2489 |
|                       | $\beta$ -spin          | 0.1804 | -0.0520 | 0.2324 |
|                       | $(\alpha+\beta)$ -spin | 0.3878 | -0.0935 | 0.4813 |
| $Cm(L_d)_2(NO_3)_2^+$ | $\alpha$ -spin         | 0.2003 | -0.0453 | 0.2456 |
|                       | $\beta$ -spin          | 0.1806 | -0.0508 | 0.2314 |
|                       | $(\alpha+\beta)$ -spin | 0.3809 | -0.0961 | 0.4770 |
| $Eu(L_d)_2(NO_3)_2^+$ | $\alpha$ -spin         | 0.1446 | -0.0773 | 0.2219 |
|                       | $\beta$ -spin          | 0.1232 | -0.0839 | 0.2070 |
|                       | $(\alpha+\beta)$ -spin | 0.2678 | -0.1611 | 0.4289 |

**Cartesian coordinates**

PBE0/6-311G\*-RECP

Am(L<sub>a</sub>)<sub>2</sub>(NO<sub>3</sub>)<sub>2</sub><sup>+</sup>

|   | X           | Y           | Z           |
|---|-------------|-------------|-------------|
| C | 0.73099200  | 5.79429300  | 0.26635600  |
| C | -0.43219400 | 5.27513700  | 0.81095600  |
| N | 0.25087300  | 3.06057700  | 0.21801500  |
| C | 1.36513300  | 3.56216800  | -0.33298500 |
| C | 2.29175700  | 2.59032600  | -0.95501100 |
| N | 2.19523200  | 1.31973500  | -0.55920500 |
| C | 3.01932800  | 0.40457300  | -1.08159600 |
| C | 3.93180600  | 0.70999400  | -2.08375500 |
| C | 4.00515600  | 2.02207500  | -2.52839700 |
| C | 2.74570200  | -0.97941700 | -0.56231100 |
| O | 1.64650700  | -1.18288700 | -0.02258100 |
| N | 3.61878600  | -1.99027100 | -0.70385300 |
| C | 5.01431700  | -1.82484100 | -0.95870200 |
| C | 3.14701900  | -3.34496100 | -0.35040500 |
| C | 2.18715300  | -3.92837100 | -1.37134500 |
| C | 5.60507100  | -2.46838900 | -2.04397200 |
| C | 7.15696800  | -0.92145500 | -0.34479300 |
| C | 5.79754500  | -1.06232600 | -0.09926300 |
| H | 0.93398700  | 6.85956200  | 0.29921300  |
| H | -1.17398600 | 5.91231600  | 1.27800300  |
| H | 4.55857100  | -0.05342500 | -2.52294900 |
| H | 4.68649600  | 2.29030500  | -3.32851200 |
| H | 2.67092400  | -3.28958500 | 0.63151400  |
| H | 4.04123800  | -3.96094400 | -0.25255500 |
| H | 1.90009800  | -4.93774600 | -1.06587200 |
| H | 2.64524200  | -3.99826400 | -2.36102100 |
| H | 1.27660400  | -3.33251500 | -1.44987100 |
| H | 4.99610000  | -3.06269700 | -2.71808900 |
| H | 7.75692100  | -0.31952600 | 0.33148700  |
| H | 5.34373600  | -0.58010200 | 0.76139500  |
| N | 0.47650300  | 1.70310600  | 3.14748000  |
| O | -0.71045500 | 1.57083500  | 2.71554200  |
| O | 0.72509800  | 2.17414700  | 4.21909200  |
| O | 1.39004700  | 1.29620700  | 2.35587700  |
| N | -0.70454400 | -0.63987600 | -2.14578000 |
| O | -0.01166100 | 0.40829500  | -2.00961500 |
| O | -0.92601700 | -1.13703500 | -3.21754100 |
| O | -1.16589100 | -1.13766700 | -1.06789400 |
| C | 6.96590500  | -2.32869800 | -2.27044500 |
| H | 7.41504500  | -2.83149300 | -3.12220000 |

|   |             |             |             |
|---|-------------|-------------|-------------|
| C | -0.62640100 | 3.90167400  | 0.76615500  |
| H | -1.51230500 | 3.44687900  | 1.19170400  |
| C | 0.27617000  | -3.12051000 | 4.61515700  |
| C | 1.40465600  | -2.53542500 | 4.06410400  |
| N | 0.04180900  | -1.33010200 | 2.50803200  |
| C | -1.05554000 | -1.88087400 | 3.04881100  |
| C | -2.35571200 | -1.47370000 | 2.46666700  |
| N | -2.31179300 | -0.63304600 | 1.42947500  |
| C | -3.44698100 | -0.26027400 | 0.83264000  |
| C | -4.69632900 | -0.66464200 | 1.28405400  |
| C | -4.75222100 | -1.50553200 | 2.38471500  |
| C | -3.23595300 | 0.75545600  | -0.25555200 |
| O | -2.24538200 | 1.49765900  | -0.14778700 |
| N | -4.11736000 | 0.89684600  | -1.25369300 |
| C | -5.03227600 | -0.13189700 | -1.64492400 |
| C | -3.95860600 | 2.03620700  | -2.17471800 |
| C | -3.12127100 | 1.70518400  | -3.39585100 |
| C | -6.39403000 | 0.14755600  | -1.73203800 |
| C | -5.45655900 | -2.38193200 | -2.36701500 |
| C | -4.55840900 | -1.39688500 | -1.97701600 |
| H | 0.35782100  | -3.82214500 | 5.43857400  |
| H | 2.39816300  | -2.75029900 | 4.43991900  |
| H | -5.60032300 | -0.32877800 | 0.79423000  |
| H | -5.70922400 | -1.83060100 | 2.77832600  |
| H | -3.51314600 | 2.85117100  | -1.60479700 |
| H | -4.96654200 | 2.33879700  | -2.46746000 |
| H | -3.12845100 | 2.55523100  | -4.08301800 |
| H | -3.51912300 | 0.84039600  | -3.93179600 |
| H | -2.08416700 | 1.50230800  | -3.12463900 |
| H | -6.76433400 | 1.13475900  | -1.47111900 |
| H | -5.07751000 | -3.36680800 | -2.62425000 |
| H | -3.49299800 | -1.60438800 | -1.93640500 |
| C | -7.27599900 | -0.84496900 | -2.13089600 |
| H | -8.33706100 | -0.61969300 | -2.19036900 |
| C | 1.23338500  | -1.64804800 | 3.01221100  |
| H | 2.08392900  | -1.15358300 | 2.55935300  |
| C | 7.76681100  | -1.55080000 | -1.42979500 |
| C | -6.82491900 | -2.12771000 | -2.45396000 |
| C | 3.19467400  | 2.97822200  | -1.94784100 |
| H | 3.22677600  | 4.00367700  | -2.29439700 |
| C | 1.64180400  | 4.92675500  | -0.31749700 |
| H | 2.56841400  | 5.30908500  | -0.72815400 |
| C | -0.96781400 | -2.78928900 | 4.10253800  |
| H | -1.85474600 | -3.23933000 | 4.52900500  |

|    |             |             |             |
|----|-------------|-------------|-------------|
| C  | -3.57506600 | -1.92780600 | 2.97386600  |
| H  | -3.61359800 | -2.58914800 | 3.82928100  |
| C  | -7.78232900 | -3.18465800 | -2.91760900 |
| H  | -8.75228700 | -3.09558200 | -2.42295200 |
| H  | -7.95991500 | -3.10109600 | -3.99500200 |
| H  | -7.39689100 | -4.18865400 | -2.72897600 |
| C  | 9.24158300  | -1.42955700 | -1.67182200 |
| H  | 9.76841200  | -2.31932500 | -1.31178000 |
| H  | 9.46751500  | -1.33100000 | -2.73632400 |
| H  | 9.66633900  | -0.56705400 | -1.15497600 |
| Am | -0.08543400 | 0.46341200  | 0.55062300  |

Cm(L<sub>a</sub>)<sub>2</sub>(NO<sub>3</sub>)<sub>2</sub><sup>+</sup>

|   |             |             |             |
|---|-------------|-------------|-------------|
| C | 0.69807400  | 5.77482300  | 0.58276700  |
| C | -0.43969400 | 5.21284000  | 1.13848000  |
| N | 0.26290000  | 3.03639700  | 0.43448200  |
| C | 1.35330200  | 3.58049500  | -0.12606500 |
| C | 2.28184000  | 2.65280900  | -0.81080600 |
| N | 2.20957900  | 1.36847800  | -0.46434000 |
| C | 3.03028700  | 0.48312300  | -1.03562000 |
| C | 3.92102300  | 0.83801700  | -2.04159200 |
| C | 3.97096300  | 2.16793800  | -2.43464700 |
| C | 2.77349000  | -0.92133100 | -0.56049100 |
| O | 1.69064300  | -1.14901200 | 0.00338900  |
| N | 3.64187200  | -1.92423700 | -0.76646900 |
| C | 5.02818300  | -1.74770100 | -1.06221800 |
| C | 3.18298100  | -3.29260100 | -0.45047500 |
| C | 2.19242500  | -3.83900200 | -1.46260700 |
| C | 5.57905200  | -2.33695000 | -2.19795600 |
| C | 7.19302400  | -0.87879700 | -0.47806200 |
| C | 5.84252500  | -1.03024600 | -0.19302600 |
| H | 0.88379000  | 6.84140800  | 0.65356300  |
| H | -1.17838700 | 5.81639000  | 1.65265900  |
| H | 4.54801000  | 0.10147300  | -2.52389400 |
| H | 4.63495500  | 2.47499300  | -3.23542300 |
| H | 2.73758300  | -3.27585700 | 0.54706600  |
| H | 4.08058300  | -3.90970300 | -0.40369400 |
| H | 1.91678000  | -4.86012000 | -1.18705000 |
| H | 2.61964800  | -3.87007400 | -2.46793900 |
| H | 1.27876400  | -3.24330800 | -1.49000900 |
| H | 4.94558000  | -2.89634300 | -2.87929900 |
| H | 7.81753000  | -0.31195600 | 0.20628700  |
| H | 5.41955000  | -0.59147900 | 0.70571300  |
| N | 0.54291000  | 1.45746400  | 3.28106200  |

|   |             |             |             |
|---|-------------|-------------|-------------|
| O | -0.64755100 | 1.40703400  | 2.83214400  |
| O | 0.79717100  | 1.85293100  | 4.38114000  |
| O | 1.44321400  | 1.05571000  | 2.47534400  |
| N | -0.66148300 | -0.58095700 | -2.13315500 |
| O | 0.00177000  | 0.47840300  | -1.92809700 |
| O | -0.86402600 | -1.01101600 | -3.23762800 |
| O | -1.11021400 | -1.15773000 | -1.09335700 |
| C | 6.93165200  | -2.18714900 | -2.46428700 |
| H | 7.34967300  | -2.64683600 | -3.35532700 |
| C | -0.61159500 | 3.83931200  | 1.04196400  |
| H | -1.47711600 | 3.35287000  | 1.47407900  |
| C | 0.11811900  | -3.41052500 | 4.47748400  |
| C | 1.26741400  | -2.83287400 | 3.96363500  |
| N | -0.04495800 | -1.52488100 | 2.44619100  |
| C | -1.16205100 | -2.07348400 | 2.94836700  |
| C | -2.44613200 | -1.61707400 | 2.36499800  |
| N | -2.36804200 | -0.71318500 | 1.38715800  |
| C | -3.48047500 | -0.29348800 | 0.78242900  |
| C | -4.74643400 | -0.71176500 | 1.17079600  |
| C | -4.83926800 | -1.62068000 | 2.21403300  |
| C | -3.21842200 | 0.77709900  | -0.24009300 |
| O | -2.21529500 | 1.49118900  | -0.06271400 |
| N | -4.06189100 | 0.99001100  | -1.25649300 |
| C | -4.98432900 | 0.00264300  | -1.72950400 |
| C | -3.85576300 | 2.17437100  | -2.10917900 |
| C | -3.01483100 | 1.88630700  | -3.33854100 |
| C | -6.33707000 | 0.31342500  | -1.84208800 |
| C | -5.42621000 | -2.19740100 | -2.58303500 |
| C | -4.52316100 | -1.25218800 | -2.11454700 |
| H | 0.17152000  | -4.14710400 | 5.27222100  |
| H | 2.25067100  | -3.08945200 | 4.34025300  |
| H | -5.63399000 | -0.33785400 | 0.67830500  |
| H | -5.80960100 | -1.96193400 | 2.55825300  |
| H | -3.39158300 | 2.93997500  | -1.48831900 |
| H | -4.84997900 | 2.52617700  | -2.39423900 |
| H | -2.97856800 | 2.77758000  | -3.97037600 |
| H | -3.43937300 | 1.07422700  | -3.93323200 |
| H | -1.99064400 | 1.62399800  | -3.06888700 |
| H | -6.69761200 | 1.29227300  | -1.53951700 |
| H | -5.05716700 | -3.17459100 | -2.88086000 |
| H | -3.46363000 | -1.48385800 | -2.05328400 |
| C | -7.22405700 | -0.63951900 | -2.31922600 |
| H | -8.27853700 | -0.39069800 | -2.39808100 |
| C | 1.13171900  | -1.89576900 | 2.95004200  |

|    |             |             |             |
|----|-------------|-------------|-------------|
| H  | 1.99950100  | -1.40345200 | 2.52945200  |
| C  | 7.76321800  | -1.45331200 | -1.61391000 |
| C  | -6.78660100 | -1.91188500 | -2.69673400 |
| C  | 3.16050300  | 3.09235500  | -1.80385200 |
| H  | 3.17535500  | 4.13071400  | -2.11127600 |
| C  | 1.60612600  | 4.94816100  | -0.06127100 |
| H  | 2.51402800  | 5.36318100  | -0.48174700 |
| C  | -1.11042400 | -3.02596200 | 3.96463200  |
| H  | -2.01409700 | -3.46789400 | 4.36357700  |
| C  | -3.68298900 | -2.09256100 | 2.80751700  |
| H  | -3.75220000 | -2.81098600 | 3.61365500  |
| C  | -7.74765100 | -2.92411900 | -3.24487400 |
| H  | -8.73869000 | -2.82418900 | -2.79646300 |
| H  | -7.86745600 | -2.79864200 | -4.32619100 |
| H  | -7.39957600 | -3.94477100 | -3.07347700 |
| C  | 9.22914500  | -1.32124900 | -1.90012900 |
| H  | 9.76849100  | -2.22062200 | -1.58522200 |
| H  | 9.42004200  | -1.18888400 | -2.96774000 |
| H  | 9.66950900  | -0.47446000 | -1.37042200 |
| Cm | -0.08648700 | 0.42801700  | 0.61429400  |

Eu(L<sub>a</sub>)<sub>2</sub>(NO<sub>3</sub>)<sub>2</sub><sup>+</sup>

|   |             |             |             |
|---|-------------|-------------|-------------|
| C | 0.62410500  | 5.85130300  | 0.27454100  |
| C | -0.53271100 | 5.31281400  | 0.81361800  |
| N | 0.20731300  | 3.10518800  | 0.26029300  |
| C | 1.31617600  | 3.62553000  | -0.28484900 |
| C | 2.27196600  | 2.66702300  | -0.88342100 |
| N | 2.18305600  | 1.39888400  | -0.48446800 |
| C | 3.01968500  | 0.48729500  | -0.99052500 |
| C | 3.95007800  | 0.79786900  | -1.97501600 |
| C | 4.02298800  | 2.11110500  | -2.41803500 |
| C | 2.73185200  | -0.89341200 | -0.46737900 |
| O | 1.64195300  | -1.07248000 | 0.10025600  |
| N | 3.57253700  | -1.92689700 | -0.63017800 |
| C | 4.96256500  | -1.80507800 | -0.93607200 |
| C | 3.07611600  | -3.26760500 | -0.25534100 |
| C | 2.05678200  | -3.82430300 | -1.23276200 |
| C | 5.48691200  | -2.43947300 | -2.05979500 |
| C | 7.15922400  | -0.99912800 | -0.38083100 |
| C | 5.80559300  | -1.09634200 | -0.08735100 |
| H | 0.80218900  | 6.92135200  | 0.29381000  |
| H | -1.29450600 | 5.93883400  | 1.26328900  |
| H | 4.59093100  | 0.04052400  | -2.40360300 |

|   |             |             |             |
|---|-------------|-------------|-------------|
| H | 4.71998400  | 2.38357600  | -3.20311700 |
| H | 2.64534200  | -3.19873300 | 0.74655100  |
| H | 3.95597700  | -3.90869400 | -0.19572900 |
| H | 1.76614800  | -4.83041600 | -0.91982500 |
| H | 2.46623700  | -3.89621600 | -2.24335000 |
| H | 1.15479600  | -3.21147100 | -1.26401800 |
| H | 4.83075000  | -2.99163400 | -2.72534500 |
| H | 7.80634800  | -0.43814400 | 0.28715200  |
| H | 5.40213600  | -0.62044400 | 0.80137700  |
| N | 0.42092300  | 1.76261300  | 3.16145800  |
| O | -0.75800300 | 1.61823800  | 2.71319300  |
| O | 0.65095200  | 2.24514700  | 4.23187400  |
| O | 1.34760400  | 1.35462600  | 2.38690700  |
| N | -0.66116100 | -0.58150200 | -2.05158200 |
| O | -0.00621900 | 0.48868700  | -1.90587700 |
| O | -0.87984300 | -1.06717100 | -3.12976300 |
| O | -1.08803300 | -1.11388300 | -0.97735800 |
| C | 6.84276200  | -2.34347900 | -2.33491900 |
| H | 7.24017200  | -2.83788700 | -3.21673600 |
| C | -0.69429900 | 3.93462100  | 0.78636700  |
| H | -1.57324800 | 3.46591000  | 1.21098200  |
| C | 0.30896200  | -3.07365700 | 4.66868900  |
| C | 1.42711100  | -2.44507900 | 4.14503800  |
| N | 0.05416100  | -1.26498800 | 2.57775500  |
| C | -1.03343300 | -1.85627400 | 3.09444600  |
| C | -2.33575700 | -1.47878300 | 2.49757600  |
| N | -2.29430100 | -0.63110800 | 1.46820800  |
| C | -3.42620200 | -0.27718500 | 0.85667900  |
| C | -4.67426700 | -0.70977800 | 1.28548800  |
| C | -4.72883700 | -1.56018000 | 2.37937100  |
| C | -3.20819300 | 0.74687400  | -0.22228100 |
| O | -2.22026300 | 1.49028100  | -0.09811700 |
| N | -4.07690900 | 0.89278700  | -1.23047100 |
| C | -4.98341000 | -0.13662200 | -1.63908800 |
| C | -3.91530600 | 2.04069000  | -2.14056900 |
| C | -3.08762900 | 1.71835500  | -3.37054700 |
| C | -6.34561300 | 0.13641800  | -1.73655100 |
| C | -5.38874300 | -2.38283500 | -2.38352300 |
| C | -4.49966200 | -1.39628700 | -1.97724700 |
| H | 0.39898100  | -3.78295300 | 5.48466400  |
| H | 2.42030900  | -2.63188000 | 4.53646500  |
| H | -5.57812000 | -0.38921100 | 0.78526200  |
| H | -5.68486600 | -1.90766300 | 2.75586500  |
| H | -3.46136500 | 2.84617900  | -1.56413100 |

|    |             |             |             |
|----|-------------|-------------|-------------|
| H  | -4.92295700 | 2.35341300  | -2.42409900 |
| H  | -3.09311700 | 2.57731500  | -4.04659200 |
| H  | -3.49555000 | 0.86363800  | -3.91496900 |
| H  | -2.05041400 | 1.50387000  | -3.10933200 |
| H  | -6.72358500 | 1.11936100  | -1.47072300 |
| H  | -5.00215200 | -3.36360300 | -2.64516200 |
| H  | -3.43374300 | -1.59924400 | -1.92808000 |
| C  | -7.21858200 | -0.85759000 | -2.15144200 |
| H  | -8.28027300 | -0.63754900 | -2.21860700 |
| C  | 1.24593000  | -1.55097200 | 3.10029700  |
| H  | 2.08726800  | -1.02129900 | 2.67070900  |
| C  | 7.70359200  | -1.62001500 | -1.50505300 |
| C  | -6.75768600 | -2.13516400 | -2.48078200 |
| C  | 3.19144800  | 3.06167100  | -1.85887500 |
| H  | 3.22230500  | 4.08603100  | -2.20881900 |
| C  | 1.56104700  | 4.99633400  | -0.28573100 |
| H  | 2.48304400  | 5.39426100  | -0.69179400 |
| C  | -0.93575500 | -2.77509800 | 4.13822800  |
| H  | -1.81601400 | -3.25784100 | 4.54242900  |
| C  | -3.55242100 | -1.96255200 | 2.98407900  |
| H  | -3.58998600 | -2.63018500 | 3.83480900  |
| C  | -7.70497800 | -3.19358500 | -2.96151600 |
| H  | -8.68115200 | -3.11127200 | -2.47808200 |
| H  | -7.86993700 | -3.10499000 | -4.04051400 |
| H  | -7.31751800 | -4.19695500 | -2.77362100 |
| C  | 9.17196000  | -1.54684100 | -1.79958700 |
| H  | 9.68212400  | -2.45231900 | -1.45489300 |
| H  | 9.36310800  | -1.45814600 | -2.87159400 |
| H  | 9.64244600  | -0.69748400 | -1.30078500 |
| Eu | -0.08947300 | 0.51882600  | 0.61590700  |

Am(L<sub>b</sub>)<sub>2</sub>(NO<sub>3</sub>)<sub>2</sub><sup>+</sup>

|   |             |            |             |
|---|-------------|------------|-------------|
| C | -0.87285400 | 5.12676900 | -2.48563600 |
| C | 0.22410600  | 4.41219900 | -2.89939700 |
| N | -0.43849200 | 2.52800600 | -1.57857300 |
| C | -1.53707400 | 3.20639900 | -1.19218000 |
| C | -1.79161100 | 4.53161400 | -1.60313200 |
| C | -2.48220100 | 2.54781400 | -0.32473400 |
| C | -3.59843300 | 3.27134300 | 0.15543400  |
| N | -2.26643900 | 1.26420000 | 0.00094300  |
| C | -3.11895200 | 0.64088600 | 0.80292700  |
| C | -4.21881700 | 1.29664600 | 1.37894200  |
| C | -4.45307900 | 2.60907100 | 1.04858300  |



|   |             |             |             |
|---|-------------|-------------|-------------|
| C | -2.69676000 | -0.77236100 | 1.09797100  |
| O | -1.52915800 | -1.09127000 | 0.82263100  |
| N | -3.51321500 | -1.66743700 | 1.68083400  |
| C | -4.93759700 | -1.57209500 | 1.70129600  |
| C | -2.91202900 | -2.94546700 | 2.11439700  |
| C | -2.05579300 | -2.80988000 | 3.36011000  |
| C | -5.62273700 | -1.63326900 | 2.91262300  |
| C | -7.03508800 | -1.39235300 | 0.53793200  |
| C | -5.64877900 | -1.46702800 | 0.51077800  |
| H | -1.04145000 | 6.14243200  | -2.83111100 |
| H | 0.94751500  | 4.83371100  | -3.58760700 |
| H | -4.87165500 | 0.78498600  | 2.07171500  |
| H | -5.29868600 | 3.13854900  | 1.47662500  |
| H | -2.31668500 | -3.33493600 | 1.28502200  |
| H | -3.74346800 | -3.63110800 | 2.27971200  |
| H | -1.65829000 | -3.78943000 | 3.63753600  |
| H | -2.63399500 | -2.43342200 | 4.20755600  |
| H | -1.20931000 | -2.14291600 | 3.19050100  |
| H | -5.06981900 | -1.71258900 | 3.84337600  |
| H | -7.57853300 | -1.30409200 | -0.39827000 |
| H | -5.11730100 | -1.44109700 | -0.43593000 |
| N | -0.62199500 | -0.13317300 | -3.40676200 |
| O | 0.57557100  | 0.05393100  | -3.02798400 |
| O | -0.91982600 | -0.27947400 | -4.55680400 |
| O | -1.49060500 | -0.15729200 | -2.47306300 |
| N | 0.77386800  | 0.69284800  | 2.26191500  |
| O | 0.00978700  | 1.46166100  | 1.61149500  |
| O | 1.03376100  | 0.86560500  | 3.42237000  |
| O | 1.26502200  | -0.27978800 | 1.60211100  |
| C | -7.00778000 | -1.56876800 | 2.92429800  |
| H | -7.53192000 | -1.61169800 | 3.87482100  |
| C | -3.80811900 | 4.62068300  | -0.26002700 |
| H | -4.67460400 | 5.15401400  | 0.11783300  |
| C | -2.94647700 | 5.22014400  | -1.11722100 |
| H | -3.11518100 | 6.24208400  | -1.44260800 |
| C | 0.40798900  | 3.11344900  | -2.40869800 |
| H | 1.27202400  | 2.52633400  | -2.69666600 |
| C | 0.08676100  | -5.01869600 | -2.36335100 |
| C | -1.09715500 | -4.35619800 | -2.14967100 |
| N | 0.06553800  | -2.41000500 | -1.37089400 |
| C | 1.23360700  | -3.04894300 | -1.58606600 |
| C | 1.30078000  | -4.36745800 | -2.08404800 |
| C | 2.45758900  | -2.34587900 | -1.30168100 |
| C | 3.69633800  | -2.98700900 | -1.52540300 |

|    |             |             |             |
|----|-------------|-------------|-------------|
| N  | 2.37398200  | -1.08718300 | -0.84411200 |
| C  | 3.48272800  | -0.42477400 | -0.55366400 |
| C  | 4.75905800  | -0.97208500 | -0.75512300 |
| C  | 4.85877500  | -2.24990900 | -1.24878300 |
| C  | 3.22071300  | 1.00053700  | -0.15030500 |
| O  | 2.18392500  | 1.52722900  | -0.58605900 |
| N  | 4.10458800  | 1.68558700  | 0.58794500  |
| C  | 5.07293300  | 1.05396500  | 1.43017300  |
| C  | 3.88670700  | 3.12970400  | 0.77933600  |
| C  | 3.04099600  | 3.45133100  | 1.99731200  |
| C  | 6.41885200  | 1.39767200  | 1.32101800  |
| C  | 5.61642100  | -0.47664000 | 3.19879700  |
| C  | 4.66688500  | 0.12415500  | 2.38190600  |
| H  | 0.09752100  | -6.03273000 | -2.75177300 |
| H  | -2.05210900 | -4.82044800 | -2.36698400 |
| H  | 5.64649400  | -0.39531400 | -0.53133700 |
| H  | 5.83295500  | -2.69466300 | -1.42750700 |
| H  | 3.42028300  | 3.50824700  | -0.13020400 |
| H  | 4.87711200  | 3.58214000  | 0.86495000  |
| H  | 3.00112300  | 4.53468400  | 2.13758800  |
| H  | 3.46235400  | 3.01326600  | 2.90503900  |
| H  | 2.01842600  | 3.09061900  | 1.87731900  |
| H  | 6.73648800  | 2.12133100  | 0.57595000  |
| H  | 5.29009300  | -1.20152300 | 3.93890600  |
| H  | 3.61365600  | -0.12052300 | 2.48605600  |
| C  | 3.72452600  | -4.32331900 | -2.02759000 |
| H  | 4.68658300  | -4.79754200 | -2.19385600 |
| C  | 2.57269500  | -4.98591200 | -2.29461500 |
| H  | 2.59782000  | -6.00096200 | -2.67880600 |
| C  | -1.05709400 | -3.04758800 | -1.65291300 |
| H  | -1.97313700 | -2.48902800 | -1.49824400 |
| C  | -7.73999100 | -1.44353100 | 1.74032400  |
| C  | 6.96927400  | -0.15423300 | 3.10230400  |
| C  | -9.23860200 | -1.40222100 | 1.76594100  |
| H  | -9.65287900 | -2.41182100 | 1.85586400  |
| H  | -9.61033200 | -0.82519900 | 2.61595600  |
| H  | -9.64664500 | -0.96228000 | 0.85404100  |
| C  | 7.35193200  | 0.79512300  | 2.15008300  |
| H  | 8.39988600  | 1.06499500  | 2.05439600  |
| C  | 7.98351600  | -0.77456000 | 4.01627100  |
| H  | 8.92951900  | -0.96010800 | 3.50191800  |
| H  | 8.20002800  | -0.11270500 | 4.86138600  |
| H  | 7.63015900  | -1.72221400 | 4.42728300  |
| Am | 0.07185600  | 0.14989800  | -0.57341300 |

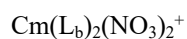

|   |             |             |             |
|---|-------------|-------------|-------------|
| C | -0.84802900 | 5.01287100  | -2.68142300 |
| C | 0.22139800  | 4.25857100  | -3.09750600 |
| N | -0.46201600 | 2.42746000  | -1.71326200 |
| C | -1.53594800 | 3.14503400  | -1.32586100 |
| C | -1.76470400 | 4.46501500  | -1.76685200 |
| C | -2.48475700 | 2.53371600  | -0.42836500 |
| C | -3.57595700 | 3.29384100  | 0.05074600  |
| N | -2.29472400 | 1.25444400  | -0.08078600 |
| C | -3.14853600 | 0.66372900  | 0.74076900  |
| C | -4.22535900 | 1.35542400  | 1.31999700  |
| C | -4.43263300 | 2.66758600  | 0.96850200  |
| C | -2.74997600 | -0.75628900 | 1.04321300  |
| O | -1.59689300 | -1.10628100 | 0.74314800  |
| N | -3.57126400 | -1.62549300 | 1.65597200  |
| C | -4.99197400 | -1.49452300 | 1.71364300  |
| C | -2.99092900 | -2.91275200 | 2.09035700  |
| C | -2.10494400 | -2.78464500 | 3.31591900  |
| C | -5.64485700 | -1.51948800 | 2.94373400  |
| C | -7.11474500 | -1.28245900 | 0.60362200  |
| C | -5.73203300 | -1.39152500 | 0.54060700  |
| H | -0.99663500 | 6.02333700  | -3.05057400 |
| H | 0.94130100  | 4.64232900  | -3.81099000 |
| H | -4.88119900 | 0.87351000  | 2.03105400  |
| H | -5.25984000 | 3.22403300  | 1.39836100  |
| H | -2.42278100 | -3.32485400 | 1.25309900  |
| H | -3.83439000 | -3.57693500 | 2.28047700  |
| H | -1.72612200 | -3.77074000 | 3.59633300  |
| H | -2.65538800 | -2.38446800 | 4.17091700  |
| H | -1.24582800 | -2.14111100 | 3.12090400  |
| H | -5.06901300 | -1.59690900 | 3.86063000  |
| H | -7.68108800 | -1.19630800 | -0.31910700 |
| H | -5.22520400 | -1.39500400 | -0.41981300 |
| N | -0.63852700 | -0.36282600 | -3.40900500 |
| O | 0.55018500  | -0.09881800 | -3.03666100 |
| O | -0.92104300 | -0.56633500 | -4.55377400 |
| O | -1.50477800 | -0.39803900 | -2.47675500 |
| N | 0.71263100  | 0.66360600  | 2.24144900  |
| O | -0.03211400 | 1.42261500  | 1.55351700  |
| O | 0.95529900  | 0.87525400  | 3.39974500  |
| O | 1.20022200  | -0.33443600 | 1.62315100  |
| C | -7.02727300 | -1.42107200 | 2.99123600  |
| H | -7.52643600 | -1.43581400 | 3.95592300  |

|   |             |             |             |
|---|-------------|-------------|-------------|
| C | -3.75728400 | 4.63828000  | -0.39338200 |
| H | -4.60370300 | 5.20352000  | -0.01635000 |
| C | -2.89390000 | 5.19411200  | -1.27836300 |
| H | -3.04212900 | 6.21186600  | -1.62611200 |
| C | 0.38191300  | 2.96898200  | -2.57579500 |
| H | 1.22399600  | 2.35219200  | -2.86714900 |
| C | 0.30660400  | -5.16802000 | -2.14561200 |
| C | -0.90233000 | -4.54314300 | -1.96158300 |
| N | 0.18151900  | -2.52086600 | -1.26556400 |
| C | 1.37372400  | -3.12356300 | -1.45230800 |
| C | 1.49358200  | -4.45904000 | -1.89174300 |
| C | 2.57082400  | -2.36547100 | -1.19358200 |
| C | 3.83436000  | -2.96985200 | -1.37789400 |
| N | 2.43717000  | -1.09456700 | -0.79112500 |
| C | 3.51496300  | -0.38278700 | -0.50866600 |
| C | 4.81388100  | -0.88841400 | -0.67286900 |
| C | 4.96557000  | -2.17931200 | -1.11809400 |
| C | 3.18482100  | 1.03941500  | -0.14710500 |
| O | 2.12777500  | 1.50709600  | -0.60521400 |
| N | 4.02394200  | 1.78250300  | 0.58545400  |
| C | 5.00971700  | 1.21429500  | 1.45282900  |
| C | 3.73885100  | 3.21919700  | 0.74249000  |
| C | 2.89615900  | 3.53166000  | 1.96485400  |
| C | 6.34043400  | 1.61253400  | 1.35006000  |
| C | 5.59595300  | -0.25300400 | 3.26094900  |
| C | 4.63190400  | 0.28971300  | 2.42152500  |
| H | 0.35756200  | -6.19657800 | -2.49024100 |
| H | -1.83813300 | -5.05282300 | -2.15967800 |
| H | 5.67729700  | -0.27262600 | -0.45905200 |
| H | 5.95750700  | -2.59428700 | -1.26860800 |
| H | 3.24186000  | 3.54940900  | -0.16950900 |
| H | 4.70738400  | 3.72109500  | 0.80091100  |
| H | 2.80020700  | 4.61515200  | 2.07332400  |
| H | 3.35550800  | 3.14528700  | 2.87764600  |
| H | 1.89285800  | 3.11270200  | 1.87467200  |
| H | 6.63602900  | 2.33217900  | 0.59220700  |
| H | 5.29195200  | -0.97481900 | 4.01348300  |
| H | 3.58878900  | 0.00305200  | 2.52115300  |
| C | 3.91501000  | -4.32405200 | -1.82301000 |
| H | 4.89442400  | -4.77074500 | -1.96211200 |
| C | 2.78923400  | -5.03790900 | -2.06921100 |
| H | 2.85364600  | -6.06675600 | -2.40971200 |
| C | -0.91473400 | -3.21402300 | -1.52046200 |
| H | -1.85173900 | -2.68613700 | -1.38705200 |

|    |             |             |             |
|----|-------------|-------------|-------------|
| C  | -7.78785500 | -1.29718800 | 1.82528400  |
| C  | 6.93574900  | 0.12307700  | 3.17004700  |
| C  | -9.28392800 | -1.22031300 | 1.88915500  |
| H  | -9.71995800 | -2.22099500 | 1.97646800  |
| H  | -9.62062200 | -0.64578700 | 2.75518800  |
| H  | -9.70379600 | -0.75933000 | 0.99308000  |
| C  | 7.28877000  | 1.06691000  | 2.20164300  |
| H  | 8.32559200  | 1.37794700  | 2.11044400  |
| C  | 7.96291600  | -0.43613300 | 4.10867000  |
| H  | 8.94323000  | -0.51592600 | 3.63340500  |
| H  | 8.07957500  | 0.21032800  | 4.98490400  |
| H  | 7.68059000  | -1.42648100 | 4.47163000  |
| Cm | 0.06648400  | 0.09495100  | -0.60781600 |

Eu(L<sub>b</sub>)<sub>2</sub>(NO<sub>3</sub>)<sub>2</sub><sup>+</sup>

|   |             |             |             |
|---|-------------|-------------|-------------|
| C | -0.79891300 | 5.02812000  | -2.71019200 |
| C | 0.27741800  | 4.27644900  | -3.11349800 |
| N | -0.41656600 | 2.44310900  | -1.73800200 |
| C | -1.49475900 | 3.15846600  | -1.36277100 |
| C | -1.72415100 | 4.47746700  | -1.80609100 |
| C | -2.44832400 | 2.54143400  | -0.47572600 |
| C | -3.55038900 | 3.29472900  | -0.01059000 |
| N | -2.25289700 | 1.26284000  | -0.12560100 |
| C | -3.11644900 | 0.66664900  | 0.68376700  |
| C | -4.20444500 | 1.35252600  | 1.24819900  |
| C | -4.41507300 | 2.66378100  | 0.89560800  |
| C | -2.71614100 | -0.75225400 | 0.98552200  |
| O | -1.56651600 | -1.09920600 | 0.67307600  |
| N | -3.52895300 | -1.62337300 | 1.60762300  |
| C | -4.94939100 | -1.49825600 | 1.68104300  |
| C | -2.94011700 | -2.91036600 | 2.03195100  |
| C | -2.03336800 | -2.78369600 | 3.24239200  |
| C | -5.58772000 | -1.51594000 | 2.91878000  |
| C | -7.08592900 | -1.30426900 | 0.59419800  |
| C | -5.70369900 | -1.40798500 | 0.51594700  |
| H | -0.94630300 | 6.03792300  | -3.08161000 |
| H | 1.00418500  | 4.66226700  | -3.81892900 |
| H | -4.86692200 | 0.86602500  | 1.94967200  |
| H | -5.25106900 | 3.21492300  | 1.31513100  |
| H | -2.38622200 | -3.32234500 | 1.18502200  |
| H | -3.78016600 | -3.57471300 | 2.23622700  |
| H | -1.65865300 | -3.77189400 | 3.52100800  |
| H | -2.56681200 | -2.37524000 | 4.10423800  |

|   |             |             |             |
|---|-------------|-------------|-------------|
| H | -1.17173700 | -2.14890700 | 3.03100900  |
| H | -5.00052900 | -1.58314400 | 3.82926700  |
| H | -7.66350900 | -1.22774800 | -0.32241500 |
| H | -5.20795900 | -1.41573800 | -0.45020000 |
| N | -0.60388000 | -0.28488700 | -3.40843900 |
| O | 0.58671300  | -0.05987800 | -3.02120700 |
| O | -0.88029500 | -0.46560400 | -4.55898100 |
| O | -1.47995800 | -0.30758700 | -2.48662800 |
| N | 0.69854900  | 0.59500300  | 2.18566200  |
| O | -0.04767900 | 1.36863800  | 1.51803700  |
| O | 0.94191200  | 0.77839700  | 3.34883900  |
| O | 1.18697000  | -0.38569300 | 1.54279200  |
| C | -6.97004900 | -1.42326100 | 2.98172500  |
| H | -7.45782300 | -1.43221700 | 3.95227300  |
| C | -3.73353600 | 4.63848500  | -0.45653000 |
| H | -4.58787900 | 5.19831000  | -0.08944800 |
| C | -2.86261300 | 5.20033500  | -1.33028000 |
| H | -3.01252100 | 6.21762900  | -1.67868100 |
| C | 0.43534400  | 2.98679700  | -2.59042000 |
| H | 1.28063200  | 2.37046300  | -2.87334000 |
| C | 0.26010900  | -5.09736700 | -2.29497400 |
| C | -0.94606300 | -4.47333200 | -2.09001300 |
| N | 0.14655400  | -2.47219700 | -1.34941000 |
| C | 1.33478600  | -3.07331600 | -1.55789600 |
| C | 1.45022000  | -4.39776300 | -2.03008700 |
| C | 2.53198400  | -2.32217400 | -1.28541100 |
| C | 3.79438500  | -2.92393500 | -1.48581500 |
| N | 2.39976600  | -1.06075800 | -0.85155400 |
| C | 3.48040900  | -0.36103200 | -0.54724300 |
| C | 4.77776200  | -0.86570800 | -0.72369800 |
| C | 4.92739500  | -2.14373000 | -1.20522600 |
| C | 3.15181500  | 1.04943100  | -0.14452200 |
| O | 2.09288200  | 1.52536200  | -0.58677600 |
| N | 3.99145600  | 1.77377600  | 0.60657700  |
| C | 4.98237500  | 1.18469000  | 1.45361500  |
| C | 3.70236700  | 3.20464400  | 0.80444400  |
| C | 2.86808700  | 3.48226800  | 2.04102700  |
| C | 6.31155700  | 1.58920500  | 1.35570700  |
| C | 5.58080700  | -0.32850500 | 3.21938500  |
| C | 4.61146500  | 0.23351400  | 2.39898700  |
| H | 0.30623600  | -6.11748300 | -2.66445900 |
| H | -1.88420000 | -4.97565700 | -2.29587800 |
| H | 5.64201400  | -0.25822600 | -0.49040100 |
| H | 5.91845900  | -2.55659400 | -1.36677000 |

|    |             |             |             |
|----|-------------|-------------|-------------|
| H  | 3.19728300  | 3.55711900  | -0.09465600 |
| H  | 4.66952500  | 3.70858000  | 0.86881600  |
| H  | 2.77091700  | 4.56234200  | 2.17868100  |
| H  | 3.33531300  | 3.07301300  | 2.93972500  |
| H  | 1.86482100  | 3.06388100  | 1.94812200  |
| H  | 6.60163900  | 2.32971600  | 0.61605200  |
| H  | 5.28237600  | -1.07118200 | 3.95364400  |
| H  | 3.56981000  | -0.05936500 | 2.49507300  |
| C  | 3.87158700  | -4.26670400 | -1.96547000 |
| H  | 4.85020200  | -4.71078700 | -2.11789400 |
| C  | 2.74454700  | -4.97330500 | -2.22655400 |
| H  | 2.80724300  | -5.99341700 | -2.59270000 |
| C  | -0.95255800 | -3.15530500 | -1.61595200 |
| H  | -1.88690300 | -2.62701700 | -1.46585400 |
| C  | -7.74466400 | -1.31208800 | 1.82388400  |
| C  | 6.91911000  | 0.05397700  | 3.13296500  |
| C  | -9.24027300 | -1.24144900 | 1.90409600  |
| H  | -9.67145800 | -2.24451300 | 1.98830900  |
| H  | -9.57013300 | -0.67472100 | 2.77779200  |
| H  | -9.67133200 | -0.77561900 | 1.01582900  |
| C  | 7.26524300  | 1.02418300  | 2.18849400  |
| H  | 8.30075400  | 1.34062700  | 2.10107100  |
| C  | 7.95187300  | -0.52670400 | 4.05221200  |
| H  | 8.93028200  | -0.59140800 | 3.57077200  |
| H  | 8.07070800  | 0.09702500  | 4.94448000  |
| H  | 7.67378100  | -1.52695300 | 4.39046100  |
| Eu | 0.06957800  | 0.11385400  | -0.63778700 |

Am(Lc)<sub>2</sub>(NO<sub>3</sub>)<sub>2</sub><sup>+</sup>

|   |             |             |             |
|---|-------------|-------------|-------------|
| C | -0.94214300 | 3.70388700  | -4.52009000 |
| C | -1.93416400 | 3.53017700  | -3.56946900 |
| N | -0.48883200 | 2.12103100  | -2.28467500 |
| C | 0.47038600  | 2.27488000  | -3.21149700 |
| C | 1.73789600  | 1.55817500  | -2.95886900 |
| N | 1.89614400  | 1.04063100  | -1.75099400 |
| C | 3.01131500  | 0.34892600  | -1.48080600 |
| C | 4.04023000  | 0.12420500  | -2.40103200 |
| C | 3.86655400  | 0.68456900  | -3.68189800 |
| C | 3.09984600  | -0.18339200 | -0.13424000 |
| O | 2.22628600  | 0.05562700  | 0.71705800  |
| N | 4.18999900  | -0.94904900 | 0.17250200  |
| C | 4.24270800  | -1.47642400 | 1.54977500  |

|   |             |             |             |
|---|-------------|-------------|-------------|
| C | 3.33264100  | -2.67275800 | 1.76014600  |
| H | -1.10733200 | 4.33198500  | -5.38910900 |
| H | -2.90121100 | 4.01016300  | -3.66363800 |
| H | 4.62398200  | 0.54043100  | -4.44587200 |
| H | 3.94909100  | -0.65724400 | 2.20738900  |
| H | 5.28168100  | -1.72524000 | 1.75703200  |
| H | 3.43639800  | -3.02525200 | 2.78936100  |
| H | 3.59603000  | -3.49967800 | 1.09784000  |
| H | 2.28550200  | -2.41341100 | 1.59955400  |
| N | -0.03675000 | 3.88050400  | 0.34174800  |
| O | -1.08737900 | 3.18167000  | 0.49140200  |
| O | -0.03410100 | 5.07188300  | 0.45757400  |
| O | 1.01819100  | 3.22334300  | 0.05863800  |
| N | -0.06863200 | -1.97686000 | -0.32018000 |
| O | 0.27586800  | -1.18691300 | -1.25022300 |
| O | -0.10331600 | -3.16836800 | -0.46868600 |
| O | -0.37698700 | -1.42475400 | 0.78228500  |
| C | -1.65732900 | 2.73199600  | -2.46746600 |
| H | -2.39484900 | 2.57843300  | -1.68927500 |
| C | 1.07571400  | 2.72355200  | 5.09558400  |
| C | 2.01924700  | 2.80369200  | 4.08471900  |
| N | 0.53988900  | 1.67145100  | 2.58275600  |
| C | -0.37200800 | 1.57937300  | 3.56405900  |
| C | -1.63916200 | 0.90531000  | 3.21206200  |
| N | -1.84263300 | 0.66346300  | 1.92672900  |
| C | -2.97103800 | 0.04705300  | 1.55083700  |
| C | -3.96174700 | -0.38706800 | 2.43776300  |
| C | -3.73391000 | -0.13098000 | 3.80428700  |
| C | -3.12353100 | -0.15444300 | 0.12132100  |
| O | -2.29526400 | 0.29217000  | -0.68963200 |
| N | -4.22631000 | -0.84156500 | -0.30501100 |
| C | -5.19836000 | -1.30284700 | 0.57517800  |
| C | -4.34699500 | -1.03144100 | -1.76365900 |
| C | -3.43526400 | -2.12083200 | -2.29871700 |
| H | 1.27277100  | 3.14461100  | 6.07583900  |
| H | 2.97807300  | 3.28444900  | 4.23948400  |
| H | -4.45885300 | -0.45180000 | 4.54568200  |
| H | -4.10162200 | -0.07309900 | -2.22344200 |
| H | -5.39252700 | -1.25142500 | -1.97027200 |
| H | -3.61093600 | -2.23908800 | -3.37087800 |
| H | -3.63249600 | -3.08280900 | -1.82160900 |
| H | -2.38343800 | -1.86991300 | -2.15833500 |
| C | 1.70203300  | 2.26568000  | 2.84473900  |
| H | 2.39965500  | 2.32320600  | 2.01804700  |



|    |              |             |             |
|----|--------------|-------------|-------------|
| C  | 5.20472200   | -1.19535100 | -0.74537400 |
| C  | 6.35136600   | -2.04313500 | -0.33755900 |
| C  | 7.57553300   | -1.45628900 | -0.02276600 |
| C  | 6.24246100   | -3.43552200 | -0.31182300 |
| C  | 8.66287700   | -2.24701600 | 0.32790400  |
| H  | 7.67717700   | -0.37534600 | -0.04668400 |
| C  | 7.33457800   | -4.21480100 | 0.03522000  |
| H  | 5.30524400   | -3.91128500 | -0.58406100 |
| C  | 8.56317300   | -3.63657200 | 0.36526400  |
| H  | 9.60782400   | -1.77114300 | 0.57380200  |
| H  | 7.23373300   | -5.29662300 | 0.04317900  |
| C  | -6.36171500  | -2.04933500 | 0.03819800  |
| C  | -7.60940000  | -1.43201300 | -0.04081100 |
| C  | -6.24516400  | -3.38783900 | -0.34139300 |
| C  | -8.71215300  | -2.13646100 | -0.50564500 |
| H  | -7.71593300  | -0.39271600 | 0.25552000  |
| C  | -7.35388700  | -4.08349900 | -0.79859200 |
| H  | -5.28787300  | -3.89352800 | -0.26021400 |
| C  | -8.60617300  | -3.47220000 | -0.89187400 |
| H  | -9.67464300  | -1.63631100 | -0.56554700 |
| H  | -7.24548900  | -5.12635500 | -1.08320200 |
| C  | -5.08944700  | -1.06949900 | 1.91041600  |
| H  | -5.86247600  | -1.44544600 | 2.56902600  |
| C  | 5.15019700   | -0.66320300 | -1.99540500 |
| H  | 5.95456400   | -0.87831200 | -2.68784800 |
| C  | 9.73905200   | -4.49487400 | 0.72482700  |
| H  | 10.10416700  | -5.04376600 | -0.14896600 |
| H  | 10.56910200  | -3.90136700 | 1.11201800  |
| H  | 9.47394700   | -5.23706700 | 1.48256300  |
| C  | -9.80434200  | -4.24234800 | -1.36050500 |
| H  | -10.25283400 | -4.80261500 | -0.53326700 |
| H  | -10.57587600 | -3.58331400 | -1.76348600 |
| H  | -9.53946200  | -4.96621700 | -2.13454500 |
| C  | 0.27649200   | 3.06632300  | -4.34095600 |
| H  | 1.06812300   | 3.20814100  | -5.06587300 |
| C  | 2.72677600   | 1.39358600  | -3.95501200 |
| H  | 2.57836100   | 1.80308700  | -4.94623200 |
| C  | -2.58584600  | 0.51255500  | 4.18436700  |
| H  | -2.39869700  | 0.69371700  | 5.23521600  |
| C  | -0.13581100  | 2.10182900  | 4.83351100  |
| H  | -0.89057900  | 2.04939800  | 5.60809100  |
| Am | -0.00349600  | 0.95941600  | 0.07059900  |

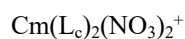

|   |             |             |             |
|---|-------------|-------------|-------------|
| C | -1.07093300 | 3.26293200  | -4.78751300 |
| C | -2.01279000 | 3.22450700  | -3.77301200 |
| N | -0.52673300 | 1.93516700  | -2.40941600 |
| C | 0.38473800  | 1.96029000  | -3.39578100 |
| C | 1.65770700  | 1.25802200  | -3.12530200 |
| N | 1.86199600  | 0.87719900  | -1.87632400 |
| C | 2.98702800  | 0.22169800  | -1.57025000 |
| C | 3.98316500  | -0.10601500 | -2.49552800 |
| C | 3.75757000  | 0.30228600  | -3.82527700 |
| C | 3.12565000  | -0.14859900 | -0.17429800 |
| O | 2.28104000  | 0.18713400  | 0.67452200  |
| N | 4.23035500  | -0.87070600 | 0.18025800  |
| C | 4.33797400  | -1.23006600 | 1.60761700  |
| C | 3.43699400  | -2.38838700 | 1.99585200  |
| H | -1.27126100 | 3.79060000  | -5.71405100 |
| H | -2.97400100 | 3.71528800  | -3.87122700 |
| H | 4.48584900  | 0.07037000  | -4.59597200 |
| H | 4.07033000  | -0.33686200 | 2.17371800  |
| H | 5.38467800  | -1.45572100 | 1.80209500  |
| H | 3.59042500  | -2.62280100 | 3.05217900  |
| H | 3.66498000  | -3.28733700 | 1.41974000  |
| H | 2.38376200  | -2.14128300 | 1.85757500  |
| N | 0.01207100  | 3.88452400  | 0.11067600  |
| O | -1.04821300 | 3.20219200  | 0.28566700  |
| O | 0.01688700  | 5.08076900  | 0.14241400  |
| O | 1.06743600  | 3.20417200  | -0.10021000 |
| N | 0.01280900  | -2.00459400 | -0.02429400 |
| O | 0.28235200  | -1.30833900 | -1.05095800 |
| O | 0.01304200  | -3.20559600 | -0.04641100 |
| O | -0.25805500 | -1.34714100 | 1.02795800  |
| C | -1.69175500 | 2.55054400  | -2.60226200 |
| H | -2.38920400 | 2.50899800  | -1.77470900 |
| C | 1.04923100  | 3.00348300  | 4.96507300  |
| C | 1.99841100  | 3.01639800  | 3.95675400  |
| N | 0.52352600  | 1.79638000  | 2.51918400  |
| C | -0.39408200 | 1.76988500  | 3.49982600  |
| C | -1.66375400 | 1.07948100  | 3.18705800  |
| N | -1.86986000 | 0.77918000  | 1.91670600  |
| C | -2.99246300 | 0.13850700  | 1.57212700  |
| C | -3.98096300 | -0.25841000 | 2.47850200  |
| C | -3.75353800 | 0.06485100  | 3.83100200  |
| C | -3.12647600 | -0.15385300 | 0.15680600  |

|   |             |             |             |
|---|-------------|-------------|-------------|
| O | -2.26746300 | 0.20903900  | -0.66607500 |
| N | -4.23453400 | -0.84852500 | -0.23992700 |
| C | -5.21801100 | -1.25076500 | 0.65701400  |
| C | -4.30200800 | -1.20703600 | -1.66978300 |
| C | -3.47806600 | -2.44002200 | -1.99282000 |
| H | 1.24209400  | 3.48502800  | 5.91794700  |
| H | 2.95832300  | 3.50242500  | 4.08634200  |
| H | -4.47692000 | -0.22262000 | 4.58745600  |
| H | -3.93619900 | -0.34364400 | -2.22512900 |
| H | -5.35068300 | -1.35663500 | -1.91772200 |
| H | -3.57593600 | -2.67095000 | -3.05639100 |
| H | -3.82591900 | -3.30901400 | -1.42987300 |
| H | -2.41915700 | -2.28254500 | -1.78217900 |
| C | 1.68660000  | 2.40203100  | 2.75117700  |
| H | 2.38967000  | 2.40283300  | 1.92739000  |
| C | 5.21409200  | -1.21906500 | -0.73929300 |
| C | 6.38371000  | -2.00607000 | -0.27925900 |
| C | 7.62211700  | -1.38425200 | -0.12751200 |
| C | 6.28403400  | -3.37921900 | -0.04492100 |
| C | 8.73264600  | -2.11918400 | 0.26743700  |
| H | 7.71533900  | -0.31812200 | -0.31179700 |
| C | 7.39958300  | -4.10395700 | 0.34418100  |
| H | 5.33463500  | -3.88626700 | -0.18694600 |
| C | 8.64291700  | -3.48886900 | 0.51073000  |
| H | 9.68775100  | -1.61547200 | 0.38593000  |
| H | 7.30471000  | -5.17259000 | 0.51587800  |
| C | -6.39309900 | -1.99793100 | 0.14290400  |
| C | -7.50234300 | -1.31816600 | -0.36331600 |
| C | -6.42277900 | -3.38994200 | 0.20255800  |
| C | -8.61023500 | -2.02305500 | -0.80954000 |
| H | -7.49924200 | -0.23262200 | -0.40368300 |
| C | -7.53727100 | -4.08600500 | -0.24725200 |
| H | -5.57278400 | -3.93160300 | 0.60666000  |
| C | -8.64863400 | -3.41825500 | -0.76047900 |
| H | -9.46589400 | -1.47796400 | -1.19828900 |
| H | -7.54227300 | -5.17097000 | -0.19400700 |
| C | -5.11005700 | -0.96159600 | 1.98068000  |
| H | -5.89863300 | -1.28315300 | 2.64966700  |
| C | 5.11196500  | -0.83728400 | -2.04067300 |
| H | 5.89329300  | -1.13012600 | -2.73101600 |
| C | 9.84636600  | -4.28968100 | 0.90925200  |
| H | 10.24506600 | -4.84425700 | 0.05341300  |
| H | 10.64771700 | -3.65305600 | 1.28880000  |
| H | 9.60214300  | -5.02250000 | 1.68219000  |

|    |              |             |             |
|----|--------------|-------------|-------------|
| C  | -9.86364300  | -4.17051800 | -1.21481100 |
| H  | -10.61244700 | -4.21565700 | -0.41697900 |
| H  | -10.33657200 | -3.69019300 | -2.07450100 |
| H  | -9.62132900  | -5.19814000 | -1.49271200 |
| C  | 0.14377800   | 2.62123300  | -4.59775600 |
| H  | 0.89798600   | 2.65914100  | -5.37369500 |
| C  | 2.60669900   | 0.97875400  | -4.13489400 |
| H  | 2.42159000   | 1.27401600  | -5.16007400 |
| C  | -2.60645900  | 0.72866400  | 4.17979600  |
| H  | -2.41757800  | 0.95679700  | 5.22131300  |
| C  | -0.16298700  | 2.37030000  | 4.73495900  |
| H  | -0.92355400  | 2.36915500  | 5.50573400  |
| Cm | 0.00335200   | 0.95472100  | 0.02963500  |

Eu(L<sub>c</sub>)<sub>2</sub>(NO<sub>3</sub>)<sub>2</sub><sup>+</sup>

|   |             |             |             |
|---|-------------|-------------|-------------|
| C | -1.09489700 | 3.21624400  | -4.84397100 |
| C | -2.03821100 | 3.19450100  | -3.83019900 |
| N | -0.54750200 | 1.94445700  | -2.43608300 |
| C | 0.36536300  | 1.95511500  | -3.42032600 |
| C | 1.63987900  | 1.26726300  | -3.12701300 |
| N | 1.83301100  | 0.90084400  | -1.87105500 |
| C | 2.96012900  | 0.25520200  | -1.54869500 |
| C | 3.96692300  | -0.07688600 | -2.46036600 |
| C | 3.75412500  | 0.31863500  | -3.79588300 |
| C | 3.08723400  | -0.09873500 | -0.14817000 |
| O | 2.23552900  | 0.25049800  | 0.68650500  |
| N | 4.18808500  | -0.81781200 | 0.22492200  |
| C | 4.28165900  | -1.15989300 | 1.65749400  |
| C | 3.36954900  | -2.30677300 | 2.05406600  |
| H | -1.29713500 | 3.72157500  | -5.78246600 |
| H | -3.00216000 | 3.67724800  | -3.94107600 |
| H | 4.49191200  | 0.08462900  | -4.55681500 |
| H | 4.01566800  | -0.25783000 | 2.21038100  |
| H | 5.32519600  | -1.39020700 | 1.86312500  |
| H | 3.51988600  | -2.53370700 | 3.11247400  |
| H | 3.58950700  | -3.21262300 | 1.48566900  |
| H | 2.31878400  | -2.05139400 | 1.91274600  |
| N | 0.00065400  | 3.89385500  | 0.00026900  |
| O | -1.05104900 | 3.21327700  | 0.22049600  |
| O | 0.00095100  | 5.09086000  | 0.00023000  |
| O | 1.05204300  | 3.21275200  | -0.21989600 |
| N | -0.00057300 | -1.90767800 | -0.00027700 |
| O | 0.28635400  | -1.23110500 | -1.03434000 |

|   |             |             |             |
|---|-------------|-------------|-------------|
| O | -0.00106800 | -3.10896500 | -0.00043200 |
| O | -0.28696700 | -1.23113800 | 1.03396100  |
| C | -1.71540100 | 2.54812400  | -2.64425800 |
| H | -2.41260100 | 2.52215500  | -1.81591000 |
| C | 1.09498000  | 3.21618800  | 4.84390700  |
| C | 2.03851300  | 3.19388800  | 3.83035300  |
| N | 0.54775400  | 1.94391100  | 2.43623900  |
| C | -0.36528900 | 1.95502800  | 3.42031300  |
| C | -1.63987600 | 1.26734300  | 3.12695000  |
| N | -1.83306900 | 0.90107000  | 1.87095800  |
| C | -2.96022400 | 0.25550800  | 1.54858200  |
| C | -3.96700600 | -0.07662200 | 2.46025100  |
| C | -3.75414100 | 0.31874600  | 3.79580500  |
| C | -3.08737700 | -0.09830500 | 0.14803200  |
| O | -2.23572400 | 0.25107800  | -0.68664100 |
| N | -4.18819900 | -0.81740200 | -0.22508900 |
| C | -5.18183500 | -1.17232000 | 0.68114400  |
| C | -4.28185500 | -1.15924800 | -1.65771600 |
| C | -3.36958300 | -2.30587200 | -2.05464800 |
| H | 1.29714100  | 3.72175400  | 5.78229200  |
| H | 3.00257500  | 3.67639000  | 3.94131600  |
| H | -4.49189300 | 0.08466300  | 4.55674600  |
| H | -4.01609600 | -0.25702800 | -2.21046000 |
| H | -5.32537500 | -1.38971700 | -1.86326900 |
| H | -3.51988200 | -2.53245300 | -3.11313900 |
| H | -3.58940300 | -3.21195800 | -1.48657800 |
| H | -2.31885000 | -2.05041000 | -1.91325400 |
| C | 1.71578000  | 2.54729200  | 2.64450400  |
| H | 2.41317200  | 2.52087400  | 1.81632500  |
| C | 5.18174700  | -1.17265000 | -0.68130900 |
| C | 6.34744400  | -1.95475100 | -0.20400300 |
| C | 7.58846100  | -1.33485900 | -0.06592600 |
| C | 6.24274200  | -3.32232800 | 0.05922200  |
| C | 8.69647400  | -2.06567800 | 0.34328700  |
| H | 7.68545100  | -0.27301900 | -0.27170200 |
| C | 7.35585300  | -4.04322500 | 0.46208600  |
| H | 5.29133300  | -3.82867500 | -0.07129800 |
| C | 8.60181000  | -3.42976800 | 0.61458700  |
| H | 9.65350300  | -1.56317800 | 0.45100200  |
| H | 7.25695300  | -5.10768000 | 0.65596400  |
| C | -6.34748800 | -1.95452000 | 0.20392100  |
| C | -7.58876600 | -1.33493000 | 0.06674400  |
| C | -6.24252900 | -3.32193900 | -0.06000600 |
| C | -8.69676600 | -2.06587800 | -0.34224500 |

|    |              |             |             |
|----|--------------|-------------|-------------|
| H  | -7.68595000  | -0.27320200 | 0.27300200  |
| C  | -7.35563700  | -4.04298000 | -0.46263100 |
| H  | -5.29091500  | -3.82808100 | 0.06980100  |
| C  | -8.60185300  | -3.42983100 | -0.61418500 |
| H  | -9.65398300  | -1.56359200 | -0.44929800 |
| H  | -7.25651000  | -5.10730900 | -0.65707600 |
| C  | -5.09287900  | -0.80070300 | 1.98656800  |
| H  | -5.88128800  | -1.09871700 | 2.66655100  |
| C  | 5.09279200   | -0.80100200 | -1.98671700 |
| H  | 5.88124600   | -1.09891500 | -2.66669400 |
| C  | 9.80289000   | -4.22679000 | 1.02750100  |
| H  | 10.20691200  | -4.78852100 | 0.17880900  |
| H  | 10.60188700  | -3.58664300 | 1.40615000  |
| H  | 9.55428500   | -4.95295600 | 1.80523400  |
| C  | -9.80299500  | -4.22701200 | -1.02660100 |
| H  | -10.20837700 | -4.78636100 | -0.17697300 |
| H  | -10.60114200 | -3.58722900 | -1.40766500 |
| H  | -9.55403500  | -4.95524200 | -1.80226800 |
| C  | 0.12373400   | 2.58730900  | -4.63770100 |
| H  | 0.87891100   | 2.61250500  | -5.41322600 |
| C  | 2.60262200   | 0.98536600  | -4.12267300 |
| H  | 2.42684200   | 1.27208600  | -5.15184600 |
| C  | -2.60258500  | 0.98537900  | 4.12262000  |
| H  | -2.42669800  | 1.27193200  | 5.15182300  |
| C  | -0.12376800  | 2.58749800  | 4.63756200  |
| H  | -0.87912600  | 2.61312300  | 5.41290100  |
| Eu | 0.00000200   | 1.00974800  | -0.00001700 |

Am(L<sub>d</sub>)<sub>2</sub>(NO<sub>3</sub>)<sub>2</sub><sup>+</sup>

|   |             |             |             |
|---|-------------|-------------|-------------|
| C | 0.81181200  | 5.34289800  | -2.14712100 |
| C | 1.81813800  | 4.41639300  | -2.28698400 |
| N | 0.41626200  | 2.67785900  | -1.42228600 |
| C | -0.57987700 | 3.57581400  | -1.30067600 |
| C | -0.43137400 | 4.93508500  | -1.63746000 |
| C | -1.84852200 | 3.11443300  | -0.79203500 |
| C | -2.90881000 | 4.04428300  | -0.58514700 |
| N | -1.98025700 | 1.81912100  | -0.52274100 |
| C | -3.12252800 | 1.38844000  | -0.00107100 |
| C | -4.22347900 | 2.21808200  | 0.28564100  |
| C | -4.09663900 | 3.56955200  | -0.03766300 |
| C | -3.17465200 | -0.03943300 | 0.27550100  |
| O | -2.23888100 | -0.78958800 | -0.04657700 |

|   |             |             |             |
|---|-------------|-------------|-------------|
| N | -4.29250400 | -0.52210400 | 0.89077600  |
| C | -4.30532700 | -1.97043700 | 1.16945200  |
| C | -3.46200800 | -2.34752700 | 2.37377100  |
| H | 0.96545000  | 6.38089000  | -2.42679100 |
| H | 2.78753700  | 4.69234400  | -2.68550200 |
| H | -4.91995400 | 4.25382600  | 0.14713800  |
| H | -3.92608200 | -2.46334300 | 0.27313200  |
| H | -5.34519600 | -2.26157600 | 1.30492300  |
| H | -3.52259000 | -3.42715400 | 2.53180600  |
| H | -3.81854900 | -1.85848500 | 3.28244900  |
| H | -2.41283600 | -2.08979100 | 2.22294800  |
| N | 0.10709900  | 0.45802000  | -3.67141000 |
| O | 1.14628000  | 0.20920800  | -2.98339800 |
| O | 0.14094900  | 0.59688400  | -4.85989300 |
| O | -0.97692400 | 0.55145000  | -3.00785600 |
| N | 0.09363200  | -0.01954600 | 2.17621700  |
| O | -0.32696900 | 1.00884700  | 1.56716600  |
| O | 0.21590200  | -0.05512500 | 3.37080000  |
| O | 0.38471000  | -1.01362100 | 1.43871100  |
| C | -2.70893900 | 5.41902800  | -0.93733700 |
| H | -3.52584000 | 6.11770800  | -0.78738200 |
| C | -1.52847300 | 5.83963700  | -1.44760400 |
| H | -1.38846700 | 6.88228900  | -1.71609300 |
| C | 1.57598700  | 3.09155600  | -1.90568800 |
| H | 2.34638400  | 2.33539300  | -2.00184200 |
| C | -0.98037200 | -4.68399700 | -3.20657800 |
| C | -1.91534900 | -3.67605400 | -3.24515100 |
| N | -0.48025700 | -2.22008900 | -1.99824900 |
| C | 0.44861300  | -3.19482300 | -1.97570500 |
| C | 0.24505500  | -4.46073500 | -2.55858400 |
| C | 1.70779200  | -2.91293000 | -1.33108800 |
| C | 2.70667600  | -3.92602900 | -1.25740700 |
| N | 1.89369100  | -1.69438200 | -0.83156500 |
| C | 3.04733700  | -1.41709100 | -0.23565200 |
| C | 4.09244900  | -2.34705400 | -0.07101500 |
| C | 3.89815700  | -3.62025000 | -0.60743100 |
| C | 3.17674500  | -0.05368500 | 0.26333900  |
| O | 2.27591600  | 0.78090000  | 0.08689100  |
| N | 4.32485800  | 0.26341900  | 0.93234500  |
| C | 5.36040600  | -0.65476400 | 1.10664800  |
| C | 4.37530100  | 1.60276200  | 1.54830700  |
| C | 3.75439900  | 1.61619600  | 2.93348100  |
| H | -1.17536200 | -5.64430200 | -3.67468000 |
| H | -2.86617100 | -3.80766400 | -3.74848400 |

|   |              |             |             |
|---|--------------|-------------|-------------|
| H | 4.67672500   | -4.37284200 | -0.51975500 |
| H | 3.83828900   | 2.27189600  | 0.87771000  |
| H | 5.41762300   | 1.91280300  | 1.58197600  |
| H | 3.79093200   | 2.63065400  | 3.33789500  |
| H | 4.30030900   | 0.96399800  | 3.61890700  |
| H | 2.70891200   | 1.30372000  | 2.91184800  |
| C | 2.44743500   | -5.20578600 | -1.84837000 |
| H | 3.21556100   | -5.97028300 | -1.78892200 |
| C | 1.27460200   | -5.45616000 | -2.47500500 |
| H | 1.09146600   | -6.42596200 | -2.92753100 |
| C | -1.62231300  | -2.45769400 | -2.62209600 |
| H | -2.33394600  | -1.64013000 | -2.63898500 |
| C | -5.37666000  | 0.29823400  | 1.20719700  |
| C | -6.55134900  | -0.30055600 | 1.88673500  |
| C | -7.71980600  | -0.55402300 | 1.16991800  |
| C | -6.52819000  | -0.56855400 | 3.25697200  |
| C | -8.83513500  | -1.07950500 | 1.80953400  |
| H | -7.75427600  | -0.34397400 | 0.10501600  |
| C | -7.64832400  | -1.08903300 | 3.88651000  |
| H | -5.63663300  | -0.35001500 | 3.83680900  |
| C | -8.82076700  | -1.35650000 | 3.17596700  |
| H | -9.73517900  | -1.27427300 | 1.23332600  |
| H | -7.61425800  | -1.28484300 | 4.95464000  |
| C | 6.58767900   | -0.21998100 | 1.81835000  |
| C | 7.55516100   | 0.55188600  | 1.17009100  |
| C | 6.81801800   | -0.62509300 | 3.13089500  |
| C | 8.71736400   | 0.91640000  | 1.83091500  |
| H | 7.40042500   | 0.85889400  | 0.13942300  |
| C | 7.98571900   | -0.25202600 | 3.78572800  |
| H | 6.07983600   | -1.23406900 | 3.64415000  |
| C | 8.95370300   | 0.52381200  | 3.15129300  |
| H | 9.46115500   | 1.51233800  | 1.30914100  |
| H | 8.14508300   | -0.57422800 | 4.81073600  |
| C | 5.26188800   | -1.91722300 | 0.62032200  |
| H | 6.09625200   | -2.59369400 | 0.75833800  |
| C | -5.36231900  | 1.61963200  | 0.89876200  |
| H | -6.22191300  | 2.22302700  | 1.16316300  |
| C | -10.03506700 | -1.89317200 | 3.87314300  |
| H | -10.58592800 | -1.08703600 | 4.36901500  |
| H | -10.72137800 | -2.37593800 | 3.17477200  |
| H | -9.76751000  | -2.62147800 | 4.64232400  |
| C | 10.22529500  | 0.90760800  | 3.84723100  |
| H | 11.06702800  | 0.31318900  | 3.47724500  |
| H | 10.47385500  | 1.95816100  | 3.67628400  |



|    |             |            |             |
|----|-------------|------------|-------------|
| H  | 10.15942000 | 0.74829000 | 4.92500000  |
| Am | -0.00686800 | 0.10972900 | -0.76389000 |

Cm(L<sub>d</sub>)<sub>2</sub>(NO<sub>3</sub>)<sub>2</sub><sup>+</sup>

|   |             |             |             |
|---|-------------|-------------|-------------|
| C | 0.94829300  | 5.12130600  | -2.52859300 |
| C | 1.90342600  | 4.14057900  | -2.66017600 |
| N | 0.45511800  | 2.51387000  | -1.66301600 |
| C | -0.49230800 | 3.46494000  | -1.55159200 |
| C | -0.29359800 | 4.79814600  | -1.95876800 |
| C | -1.76625800 | 3.08855400  | -0.98857800 |
| C | -2.78236400 | 4.07095000  | -0.80693400 |
| N | -1.94369900 | 1.81549900  | -0.65716100 |
| C | -3.09528300 | 1.45232400  | -0.11046200 |
| C | -4.15951700 | 2.33608600  | 0.15253900  |
| C | -3.98027200 | 3.66852200  | -0.22320200 |
| C | -3.20140500 | 0.03726800  | 0.21366400  |
| O | -2.29945900 | -0.76104100 | -0.09097300 |
| N | -4.33265700 | -0.37864800 | 0.85141700  |
| C | -4.40576300 | -1.81655300 | 1.17270400  |
| C | -3.56609700 | -2.19710800 | 2.37861000  |
| H | 1.14060300  | 6.13649100  | -2.86286100 |
| H | 2.86859500  | 4.34964500  | -3.10680200 |
| H | -4.77201000 | 4.39326400  | -0.05532700 |
| H | -4.05904800 | -2.35109700 | 0.28706800  |
| H | -5.45592300 | -2.05716100 | 1.32662900  |
| H | -3.67984200 | -3.26659100 | 2.57247300  |
| H | -3.88467500 | -1.66173000 | 3.27512600  |
| H | -2.50705800 | -1.99896300 | 2.20825600  |
| N | 0.03392000  | 0.05764200  | -3.71168900 |
| O | 1.09169500  | -0.08276900 | -3.01710800 |
| O | 0.05248100  | 0.08327700  | -4.90788900 |
| O | -1.04483100 | 0.16918200  | -3.04477300 |
| N | -0.03463600 | -0.05886300 | 2.16111800  |
| O | -0.34300500 | 0.98229400  | 1.50357800  |
| O | -0.00381200 | -0.07292000 | 3.36162200  |
| O | 0.24195500  | -1.08483600 | 1.46497200  |
| C | -2.52866700 | 5.41836600  | -1.22444200 |
| H | -3.30896400 | 6.16061300  | -1.08943800 |
| C | -1.34326100 | 5.76023400  | -1.78086500 |
| H | -1.16369300 | 6.78216500  | -2.10067300 |
| C | 1.61347000  | 2.84800900  | -2.20822800 |
| H | 2.34217100  | 2.05105200  | -2.30018200 |
| C | -0.90533900 | -5.05437300 | -2.70475200 |

|   |             |             |             |
|---|-------------|-------------|-------------|
| C | -1.86226500 | -4.07403100 | -2.82546100 |
| N | -0.44198600 | -2.47359100 | -1.74900200 |
| C | 0.50829500  | -3.42313100 | -1.64884200 |
| C | 0.32368000  | -4.74386400 | -2.10090700 |
| C | 1.77050200  | -3.05818200 | -1.05264700 |
| C | 2.78822900  | -4.04128800 | -0.88462300 |
| N | 1.93667600  | -1.79470500 | -0.68050600 |
| C | 3.07996400  | -1.44184000 | -0.10987100 |
| C | 4.14362400  | -2.32927600 | 0.14382300  |
| C | 3.97571600  | -3.65089900 | -0.27214400 |
| C | 3.16720000  | -0.03973200 | 0.27351000  |
| O | 2.23891100  | 0.74957300  | 0.03179800  |
| N | 4.30001600  | 0.36591400  | 0.91691200  |
| C | 5.36041900  | -0.50576300 | 1.17148200  |
| C | 4.30222000  | 1.75102100  | 1.42469600  |
| C | 3.61808600  | 1.86182100  | 2.77521400  |
| H | -1.08622000 | -6.05963100 | -3.07363300 |
| H | -2.81731200 | -4.27319700 | -3.29764100 |
| H | 4.76912200  | -4.37634700 | -0.11557600 |
| H | 3.78703700  | 2.35640600  | 0.67995200  |
| H | 5.33709700  | 2.08104800  | 1.48062700  |
| H | 3.63889400  | 2.90219300  | 3.10864000  |
| H | 4.13047700  | 1.25958000  | 3.52899900  |
| H | 2.57350800  | 1.54954900  | 2.72449800  |
| C | 2.54807900  | -5.37675200 | -1.34590400 |
| H | 3.32959000  | -6.11928000 | -1.21976800 |
| C | 1.37420900  | -5.70669500 | -1.93309200 |
| H | 1.20500900  | -6.71924200 | -2.28662600 |
| C | -1.58772900 | -2.79510200 | -2.32751500 |
| H | -2.31838100 | -1.99871000 | -2.40696900 |
| C | -5.37959700 | 0.49642400  | 1.14833900  |
| C | -6.57164700 | -0.03008400 | 1.85641500  |
| C | -7.76237700 | -0.23569100 | 1.16114500  |
| C | -6.54159500 | -0.27497100 | 3.23092100  |
| C | -8.89333400 | -0.69199200 | 1.82594200  |
| H | -7.80175200 | -0.04387600 | 0.09298400  |
| C | -7.67719300 | -0.72618100 | 3.88557700  |
| H | -5.63178200 | -0.09206600 | 3.79439800  |
| C | -8.87242400 | -0.94557600 | 3.19678900  |
| H | -9.81051000 | -0.85088300 | 1.26595300  |
| H | -7.63701300 | -0.90476100 | 4.95650700  |
| C | 6.57211900  | 0.02284200  | 1.84495700  |
| C | 7.51616000  | 0.76985700  | 1.13559900  |
| C | 6.81284400  | -0.26810800 | 3.18554200  |

|    |              |             |             |
|----|--------------|-------------|-------------|
| C  | 8.66615300   | 1.22084700  | 1.76321800  |
| H  | 7.35311100   | 0.98841400  | 0.08388300  |
| C  | 7.96807200   | 0.19173000  | 3.80671900  |
| H  | 6.09306400   | -0.85640800 | 3.74679600  |
| C  | 8.91291800   | 0.94259900  | 3.11067500  |
| H  | 9.39247600   | 1.79478300  | 1.19428300  |
| H  | 8.13612200   | -0.04219200 | 4.85403100  |
| C  | 5.29839600   | -1.80833500 | 0.79665700  |
| H  | 6.15062400   | -2.44649700 | 0.99526800  |
| C  | -5.31532600  | 1.80539900  | 0.79526700  |
| H  | -6.14785000  | 2.45106100  | 1.04622500  |
| C  | -10.10185300 | -1.40717100 | 3.92064700  |
| H  | -10.60640400 | -0.56455500 | 4.40510000  |
| H  | -10.82009100 | -1.87085500 | 3.24169900  |
| H  | -9.85969500  | -2.13078900 | 4.70254200  |
| C  | 10.17117700  | 1.42041400  | 3.77179000  |
| H  | 11.03717600  | 0.84943900  | 3.42169000  |
| H  | 10.36709000  | 2.47193600  | 3.54616400  |
| H  | 10.12300800  | 1.31274300  | 4.85682100  |
| Cm | -0.01285400  | 0.00343000  | -0.78683900 |

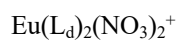

|   |             |             |             |
|---|-------------|-------------|-------------|
| C | -1.04740700 | -5.07925200 | -2.57917500 |
| C | -1.98135400 | -4.07880400 | -2.71696000 |
| N | -0.50465600 | -2.47875900 | -1.71830300 |
| C | 0.42251600  | -3.44890800 | -1.60490700 |
| C | 0.19946900  | -4.77925900 | -2.00779700 |
| C | 1.70222600  | -3.09274600 | -1.04528000 |
| C | 2.70206100  | -4.09014100 | -0.85825600 |
| N | 1.89774000  | -1.82043000 | -0.72328100 |
| C | 3.05422700  | -1.47361400 | -0.17769000 |
| C | 4.10497400  | -2.37124900 | 0.09156300  |
| C | 3.90650000  | -3.70320500 | -0.27686500 |
| C | 3.17659500  | -0.05941600 | 0.14001800  |
| O | 2.28361800  | 0.74493600  | -0.17231000 |
| N | 4.31048700  | 0.34596200  | 0.77990100  |
| C | 4.40053200  | 1.78458100  | 1.09356000  |
| C | 3.55357200  | 2.18627300  | 2.28769800  |
| H | -1.25998700 | -6.09120800 | -2.91096700 |
| H | -2.94882700 | -4.26920200 | -3.16701100 |
| H | 4.68702800  | -4.43896700 | -0.10454800 |
| H | 4.07143900  | 2.31885500  | 0.20091100  |

|   |             |             |             |
|---|-------------|-------------|-------------|
| H | 5.45242200  | 2.01102400  | 1.25681700  |
| H | 3.69134000  | 3.25283700  | 2.48231500  |
| H | 3.84599400  | 1.64421300  | 3.18912200  |
| H | 2.49232800  | 2.01437300  | 2.10381600  |
| N | -0.03000600 | -0.01728800 | -3.73010400 |
| O | -1.08852200 | 0.12435400  | -3.03801800 |
| O | -0.04515600 | -0.03606400 | -4.92660600 |
| O | 1.04624100  | -0.13784700 | -3.06125000 |
| N | 0.07855600  | 0.10792400  | 2.05223100  |
| O | 0.32842400  | -0.95347100 | 1.40354200  |
| O | 0.09399100  | 0.14373200  | 3.25282300  |
| O | -0.18930500 | 1.12894800  | 1.34799900  |
| C | 2.42371700  | -5.43500500 | -1.26890400 |
| H | 3.19037100  | -6.19069000 | -1.13022300 |
| C | 1.23234400  | -5.75858600 | -1.82427400 |
| H | 1.03544100  | -6.77882400 | -2.13930600 |
| C | -1.66740900 | -2.79100400 | -2.26705700 |
| H | -2.37833100 | -1.97904700 | -2.36526500 |
| C | 0.97409200  | 5.06568800  | -2.67200400 |
| C | 1.91806500  | 4.07419300  | -2.80499800 |
| N | 0.47447400  | 2.47444500  | -1.75886300 |
| C | -0.46358500 | 3.43524000  | -1.65048100 |
| C | -0.26152700 | 4.76075700  | -2.07912600 |
| C | -1.73183100 | 3.07437400  | -1.06901500 |
| C | -2.74060400 | 4.06317800  | -0.88462000 |
| N | -1.90818500 | 1.80562200  | -0.72365400 |
| C | -3.05272500 | 1.45448800  | -0.15646900 |
| C | -4.10912100 | 2.34482900  | 0.11501000  |
| C | -3.93233200 | 3.67209000  | -0.27981900 |
| C | -3.14124900 | 0.04937800  | 0.20920300  |
| O | -2.21235600 | -0.73441300 | -0.04568200 |
| N | -4.27128300 | -0.36261500 | 0.85245500  |
| C | -5.32766500 | 0.50997600  | 1.12271400  |
| C | -4.27221200 | -1.75426700 | 1.34166600  |
| C | -3.54771900 | -1.89136100 | 2.66860900  |
| H | 1.17014900  | 6.07427400  | -3.02361800 |
| H | 2.87734300  | 4.26814400  | -3.27076800 |
| H | -4.71982500 | 4.40111600  | -0.11062800 |
| H | -3.78655900 | -2.35545000 | 0.57359200  |
| H | -5.30831200 | -2.07427800 | 1.42468600  |
| H | -3.58322300 | -2.93347100 | 2.99541000  |
| H | -4.02075900 | -1.28275500 | 3.44286900  |
| H | -2.49799400 | -1.60463800 | 2.58483600  |
| C | -2.48357700 | 5.40380100  | -1.32168400 |

|    |              |             |             |
|----|--------------|-------------|-------------|
| H  | -3.25687300  | 6.15313200  | -1.18550200 |
| C  | -1.30342800  | 5.73103900  | -1.89859100 |
| H  | -1.12244600  | 6.74787100  | -2.23353400 |
| C  | 1.62618300   | 2.79083500  | -2.32842000 |
| H  | 2.34602300   | 1.98622600  | -2.41879300 |
| C  | 5.34564300   | -0.54160800 | 1.08216300  |
| C  | 6.54253800   | -0.02834200 | 1.79138700  |
| C  | 7.74297200   | 0.13823300  | 1.10323100  |
| C  | 6.50712300   | 0.24080100  | 3.16174300  |
| C  | 8.87905800   | 0.57999100  | 1.77001000  |
| H  | 7.78665700   | -0.07245500 | 0.03881900  |
| C  | 7.64709700   | 0.67662500  | 3.81814600  |
| H  | 5.58898200   | 0.08782000  | 3.72056600  |
| C  | 8.85298900   | 0.85727100  | 3.13563500  |
| H  | 9.80404000   | 0.70815200  | 1.21510400  |
| H  | 7.60257100   | 0.87347400  | 4.88576700  |
| C  | -6.53743600  | -0.02354100 | 1.79564900  |
| C  | -7.48705600  | -0.75953100 | 1.08188700  |
| C  | -6.77045300  | 0.25123700  | 3.14082600  |
| C  | -8.63502400  | -1.21498400 | 1.70961500  |
| H  | -7.32996000  | -0.96519800 | 0.02668000  |
| C  | -7.92397900  | -0.21313100 | 3.76218500  |
| H  | -6.04646100  | 0.83094500  | 3.70558300  |
| C  | -8.87417700  | -0.95285900 | 3.06186600  |
| H  | -9.36614600  | -1.77938800 | 1.13725000  |
| H  | -8.08633000  | 0.00873300  | 4.81299300  |
| C  | -5.26320400  | 1.81758500  | 0.76494400  |
| H  | -6.11261100  | 2.45522900  | 0.97693200  |
| C  | 5.26615400   | -1.85135800 | 0.73389900  |
| H  | 6.08977600   | -2.50604000 | 0.99079300  |
| C  | 10.08393300  | 1.30845500  | 3.86350400  |
| H  | 10.49888000  | 0.49545700  | 4.46814700  |
| H  | 10.86399200  | 1.63547700  | 3.17361600  |
| H  | 9.86616200   | 2.13592200  | 4.54356800  |
| C  | -10.12846900 | -1.44028000 | 3.72356000  |
| H  | -11.00618000 | -0.91472900 | 3.33433800  |
| H  | -10.28637100 | -2.50693700 | 3.54215100  |
| H  | -10.10213500 | -1.28417600 | 4.80336300  |
| Eu | 0.01121900   | 0.01060300  | -0.85164900 |

BP86/6-311G\*-RECP

Am(L<sub>b</sub>)<sub>2</sub>(NO<sub>3</sub>)<sub>2</sub><sup>+</sup>

|   |             |            |             |
|---|-------------|------------|-------------|
| C | -0.82493500 | 5.22584400 | -2.40524700 |
|---|-------------|------------|-------------|

|   |             |             |             |
|---|-------------|-------------|-------------|
| C | 0.28902500  | 4.51074600  | -2.81339600 |
| N | -0.39870600 | 2.58573400  | -1.52113300 |
| C | -1.51542800 | 3.26611700  | -1.13980500 |
| C | -1.76498600 | 4.61354500  | -1.54014900 |
| C | -2.47837700 | 2.59247300  | -0.29104200 |
| C | -3.61187200 | 3.31943500  | 0.19142000  |
| N | -2.26561300 | 1.29000900  | 0.02269500  |
| C | -3.13915200 | 0.65387200  | 0.82288500  |
| C | -4.24995600 | 1.31670300  | 1.39888400  |
| C | -4.48257700 | 2.64286400  | 1.07689400  |
| C | -2.71831500 | -0.76425900 | 1.11684400  |
| O | -1.53600000 | -1.09446100 | 0.83504800  |
| N | -3.54312500 | -1.66491600 | 1.72453200  |
| C | -4.98065800 | -1.58407700 | 1.72126600  |
| C | -2.92959600 | -2.94692900 | 2.18721700  |
| C | -2.07955600 | -2.79066100 | 3.44957300  |
| C | -5.69315000 | -1.67027600 | 2.92982000  |
| C | -7.07874500 | -1.42375800 | 0.51379300  |
| C | -5.68035700 | -1.47473200 | 0.50942700  |
| H | -0.98891400 | 6.25462400  | -2.74096300 |
| H | 1.02943900  | 4.94712300  | -3.48803400 |
| H | -4.91353900 | 0.79513200  | 2.08753600  |
| H | -5.33738900 | 3.17368300  | 1.50686500  |
| H | -2.31816500 | -3.34029500 | 1.36037800  |
| H | -3.76537100 | -3.64116100 | 2.35077200  |
| H | -1.67418300 | -3.77293200 | 3.74019900  |
| H | -2.67149800 | -2.40864200 | 4.29566700  |
| H | -1.22997300 | -2.11480700 | 3.27947300  |
| H | -5.15240000 | -1.74983800 | 3.87722900  |
| H | -7.61112600 | -1.33440100 | -0.43860800 |
| H | -5.13024600 | -1.43196300 | -0.43537700 |
| N | -0.57889500 | -0.01502800 | -3.43692800 |
| O | 0.64044200  | 0.12192700  | -3.02254300 |
| O | -0.87249700 | -0.11646200 | -4.61364900 |
| O | -1.47998600 | -0.03776900 | -2.49244500 |
| N | 0.79667100  | 0.73571400  | 2.27725000  |
| O | 0.03140600  | 1.52987200  | 1.61032900  |
| O | 1.08857000  | 0.92094900  | 3.44958100  |
| O | 1.25411200  | -0.28564200 | 1.60929500  |
| C | -7.08998600 | -1.62891900 | 2.91744700  |
| H | -7.63303300 | -1.69129800 | 3.86618600  |
| C | -3.81505800 | 4.68041900  | -0.21238800 |
| H | -4.69215800 | 5.21511800  | 0.16430400  |
| C | -2.93263600 | 5.29802000  | -1.05844300 |

|   |             |             |             |
|---|-------------|-------------|-------------|
| H | -3.09896500 | 6.33279000  | -1.37347000 |
| C | 0.46902300  | 3.19575900  | -2.33683100 |
| H | 1.34595300  | 2.60974000  | -2.61873600 |
| C | -0.07113400 | -4.98843100 | -2.47842500 |
| C | -1.24593700 | -4.28911900 | -2.25185900 |
| N | -0.02096500 | -2.37462400 | -1.41839700 |
| C | 1.14083800  | -3.05113100 | -1.64612400 |
| C | 1.16992800  | -4.37475000 | -2.18070300 |
| C | 2.38956900  | -2.38516700 | -1.34499900 |
| C | 3.62436500  | -3.05917300 | -1.59465600 |
| N | 2.33776500  | -1.12257300 | -0.85180300 |
| C | 3.48167300  | -0.48511100 | -0.55873300 |
| C | 4.74986300  | -1.06851900 | -0.79080700 |
| C | 4.81579000  | -2.34944900 | -1.31281500 |
| C | 3.26301900  | 0.94947200  | -0.13861000 |
| O | 2.21692500  | 1.51647300  | -0.54756800 |
| N | 4.20320000  | 1.61966800  | 0.57937600  |
| C | 5.17247800  | 0.95602600  | 1.41595900  |
| C | 4.04225500  | 3.08948300  | 0.75789000  |
| C | 3.28023100  | 3.46644200  | 2.02958000  |
| C | 6.53696800  | 1.27368200  | 1.30079400  |
| C | 5.69682100  | -0.60730800 | 3.18992500  |
| C | 4.74901700  | 0.02147800  | 2.37421600  |
| H | -0.08944300 | -6.00156900 | -2.89202700 |
| H | -2.22061300 | -4.72477400 | -2.48420200 |
| H | 5.66097900  | -0.51264400 | -0.56794900 |
| H | 5.78514800  | -2.81612600 | -1.51289700 |
| H | 3.52674700  | 3.46438300  | -0.13623700 |
| H | 5.05842900  | 3.51313400  | 0.77220000  |
| H | 3.26991300  | 4.56280200  | 2.13812300  |
| H | 3.75717600  | 3.04445700  | 2.92714000  |
| H | 2.23811200  | 3.12012500  | 1.98928500  |
| H | 6.87110500  | 1.99687200  | 0.55036600  |
| H | 5.35556100  | -1.33279400 | 3.93541100  |
| H | 3.68274400  | -0.19822400 | 2.48645700  |
| C | 3.61329800  | -4.39123400 | -2.12780000 |
| H | 4.56882300  | -4.89167300 | -2.31129200 |
| C | 2.43147000  | -5.02489300 | -2.40699300 |
| H | 2.43051600  | -6.04001500 | -2.81573300 |
| C | -1.17174200 | -2.98403100 | -1.72364900 |
| H | -2.07837800 | -2.39736600 | -1.56092000 |
| C | -7.81065100 | -1.50226500 | 1.71256600  |
| C | 7.06764000  | -0.31025700 | 3.08859700  |
| C | -9.32061300 | -1.48589400 | 1.71292500  |

|    |             |             |             |
|----|-------------|-------------|-------------|
| H  | -9.72534500 | -2.50710300 | 1.82178400  |
| H  | -9.71999500 | -0.89164300 | 2.54979900  |
| H  | -9.72497200 | -1.07131200 | 0.77760100  |
| C  | 7.46798000  | 0.64288400  | 2.12984100  |
| H  | 8.52914900  | 0.89304000  | 2.02815400  |
| C  | 8.08035200  | -0.96005400 | 4.00128900  |
| H  | 9.02048300  | -1.18366100 | 3.47284500  |
| H  | 8.33498400  | -0.29397500 | 4.84408000  |
| H  | 7.69937400  | -1.89863400 | 4.43078600  |
| Am | 0.06397800  | 0.16650200  | -0.56108600 |

Cm(L<sub>b</sub>)<sub>2</sub>(NO<sub>3</sub>)<sub>2</sub><sup>+</sup>

|   |             |             |             |
|---|-------------|-------------|-------------|
| C | -0.81451100 | 5.02626900  | -2.75224600 |
| C | 0.25027500  | 4.24617200  | -3.17344300 |
| N | -0.44702000 | 2.41958300  | -1.75047200 |
| C | -1.51969400 | 3.16233000  | -1.35893200 |
| C | -1.73729000 | 4.49627500  | -1.81712100 |
| C | -2.47556000 | 2.56727000  | -0.44531400 |
| C | -3.56644700 | 3.35377900  | 0.03958100  |
| N | -2.29688400 | 1.27471500  | -0.08733800 |
| C | -3.16835300 | 0.69581800  | 0.75134900  |
| C | -4.23816700 | 1.41669200  | 1.33638100  |
| C | -4.43132800 | 2.74036000  | 0.97602400  |
| C | -2.78785500 | -0.73328000 | 1.06639100  |
| O | -1.62742200 | -1.11390600 | 0.76294400  |
| N | -3.63007800 | -1.58806700 | 1.71200700  |
| C | -5.06330400 | -1.45009500 | 1.74276000  |
| C | -3.05657700 | -2.88437100 | 2.18645600  |
| C | -2.17667300 | -2.73777900 | 3.42934900  |
| C | -5.74766300 | -1.48374700 | 2.96989800  |
| C | -7.18243300 | -1.23729000 | 0.58228100  |
| C | -5.78738200 | -1.34092500 | 0.54540400  |
| H | -0.95373500 | 6.04281700  | -3.13350000 |
| H | 0.97324100  | 4.61690800  | -3.90391400 |
| H | -4.90037900 | 0.94449400  | 2.06119100  |
| H | -5.25329700 | 3.31587100  | 1.41262900  |
| H | -2.47593200 | -3.31454300 | 1.35602100  |
| H | -3.91444600 | -3.54366300 | 2.37762000  |
| H | -1.80310600 | -3.72945200 | 3.73049300  |
| H | -2.73712200 | -2.31852200 | 4.27921100  |
| H | -1.30553400 | -2.09799800 | 3.23088000  |
| H | -5.18711600 | -1.56396200 | 3.90567800  |



|   |             |             |             |
|---|-------------|-------------|-------------|
| H | -7.73439300 | -1.14942000 | -0.35900900 |
| H | -5.25874000 | -1.34251400 | -0.41255700 |
| N | -0.65121300 | -0.40452000 | -3.42139300 |
| O | 0.56676000  | -0.14951100 | -3.03826800 |
| O | -0.94066700 | -0.60951600 | -4.58511400 |
| O | -1.53498600 | -0.42612600 | -2.46650100 |
| N | 0.72647700  | 0.68688700  | 2.24934600  |
| O | -0.01136100 | 1.46939300  | 1.52944400  |
| O | 0.99064300  | 0.92577400  | 3.41944100  |
| O | 1.18090600  | -0.36650200 | 1.64047500  |
| C | -7.14187000 | -1.38992200 | 2.98984000  |
| H | -7.66346900 | -1.41180000 | 3.95230500  |
| C | -3.73270600 | 4.70303000  | -0.41820000 |
| H | -4.57523300 | 5.28848800  | -0.03799600 |
| C | -2.85955300 | 5.24649400  | -1.32336400 |
| H | -3.00023000 | 6.27118300  | -1.68101900 |
| C | 0.40316100  | 2.95097800  | -2.63657000 |
| H | 1.24051900  | 2.31495000  | -2.93105000 |
| C | 0.28239200  | -5.24041200 | -2.12101800 |
| C | -0.93497100 | -4.60727700 | -1.92963400 |
| N | 0.16282900  | -2.56349700 | -1.23771800 |
| C | 1.36511200  | -3.17486400 | -1.43232500 |
| C | 1.48119200  | -4.52757300 | -1.87418100 |
| C | 2.57131600  | -2.41257600 | -1.18286700 |
| C | 3.84739600  | -3.02600400 | -1.37685200 |
| N | 2.43877100  | -1.12704800 | -0.78100300 |
| C | 3.53494500  | -0.40856300 | -0.50622300 |
| C | 4.84074000  | -0.92453300 | -0.68362000 |
| C | 4.98990000  | -2.22790200 | -1.12873600 |
| C | 3.21060200  | 1.02484000  | -0.15334000 |
| O | 2.13613700  | 1.50098000  | -0.60668600 |
| N | 4.07733800  | 1.78514300  | 0.56361500  |
| C | 5.07489300  | 1.21989200  | 1.43954700  |
| C | 3.80563200  | 3.24429300  | 0.69302600  |
| C | 3.01070900  | 3.60393500  | 1.94961600  |
| C | 6.41630300  | 1.62595800  | 1.33444300  |
| C | 5.67104600  | -0.24448300 | 3.27397600  |
| C | 4.69781900  | 0.29195600  | 2.42304700  |
| H | 0.32985900  | -6.27801400 | -2.46619700 |
| H | -1.87950400 | -5.12151000 | -2.12276900 |
| H | 5.71400900  | -0.30379400 | -0.48062800 |
| H | 5.98830200  | -2.64628300 | -1.28910300 |
| H | 3.26885000  | 3.54951100  | -0.21485400 |
| H | 4.78768900  | 3.74245900  | 0.69647400  |

|    |             |             |             |
|----|-------------|-------------|-------------|
| H  | 2.91289400  | 4.69931300  | 2.01731900  |
| H  | 3.51742300  | 3.25558200  | 2.86242900  |
| H  | 1.99970900  | 3.17363600  | 1.92240600  |
| H  | 6.71418300  | 2.34496300  | 0.56497900  |
| H  | 5.36583700  | -0.96599200 | 4.03865600  |
| H  | 3.64731600  | 0.00345400  | 2.52843000  |
| C  | 3.92206500  | -4.38872900 | -1.81947800 |
| H  | 4.90726300  | -4.84183200 | -1.96537800 |
| C  | 2.78228000  | -5.11021200 | -2.05832300 |
| H  | 2.84547300  | -6.14841100 | -2.39853300 |
| C  | -0.94602500 | -3.26778900 | -1.48800300 |
| H  | -1.88830500 | -2.73415900 | -1.34851900 |
| C  | -7.88673100 | -1.26244400 | 1.79979800  |
| C  | 7.02084800  | 0.13920000  | 3.18152600  |
| C  | -9.39465200 | -1.19088100 | 1.83573800  |
| H  | -9.83311500 | -2.19509100 | 1.96957000  |
| H  | -9.75184800 | -0.57054600 | 2.67273400  |
| H  | -9.80655800 | -0.77560800 | 0.90400700  |
| C  | 7.37300700  | 1.08550400  | 2.19750400  |
| H  | 8.41684500  | 1.40248600  | 2.10315100  |
| C  | 8.05923300  | -0.41354400 | 4.12870500  |
| H  | 9.02138200  | -0.58737000 | 3.62162900  |
| H  | 8.25316900  | 0.29209500  | 4.95526900  |
| H  | 7.73505200  | -1.36334600 | 4.57952700  |
| Cm | 0.06015300  | 0.07899400  | -0.60551900 |

Eu(L<sub>b</sub>)<sub>2</sub>(NO<sub>3</sub>)<sub>2</sub><sup>+</sup>

|   |             |             |             |
|---|-------------|-------------|-------------|
| C | -0.87210800 | 5.15380900  | -2.60869300 |
| C | 0.23900500  | 4.42636200  | -3.00258400 |
| N | -0.43797000 | 2.54415400  | -1.64196800 |
| C | -1.55224800 | 3.23560100  | -1.27519000 |
| C | -1.80519900 | 4.56987800  | -1.71659700 |
| C | -2.51442500 | 2.59021700  | -0.39957600 |
| C | -3.64470200 | 3.33330300  | 0.06604000  |
| N | -2.30489900 | 1.29907900  | -0.05134900 |
| C | -3.17441600 | 0.68383000  | 0.76248900  |
| C | -4.28244800 | 1.36196100  | 1.32801100  |
| C | -4.51215500 | 2.68099900  | 0.97322900  |
| C | -2.75332100 | -0.73599300 | 1.08031400  |
| O | -1.57484800 | -1.07575100 | 0.80947600  |
| N | -3.58921100 | -1.62145200 | 1.69666700  |
| C | -5.02618900 | -1.52898300 | 1.68860700  |
| C | -2.98999800 | -2.90623100 | 2.16946700  |
| C | -2.14165700 | -2.75115100 | 3.43309900  |

|   |             |             |             |
|---|-------------|-------------|-------------|
| C | -5.74248000 | -1.59187300 | 2.89629000  |
| C | -7.11988300 | -1.37378000 | 0.47306700  |
| C | -5.72177000 | -1.43403100 | 0.47327900  |
| H | -1.03919100 | 6.17125100  | -2.97617500 |
| H | 0.97376400  | 4.84088200  | -3.69698500 |
| H | -4.94586100 | 0.86086600  | 2.03206100  |
| H | -5.36438200 | 3.22435700  | 1.39281600  |
| H | -2.37927000 | -3.31008300 | 1.34717800  |
| H | -3.83250000 | -3.59181000 | 2.33505900  |
| H | -1.74981300 | -3.73610900 | 3.73310400  |
| H | -2.73054000 | -2.35407900 | 4.27436200  |
| H | -1.28308900 | -2.08789700 | 3.25900600  |
| H | -5.20462700 | -1.66094000 | 3.84620400  |
| H | -7.64919700 | -1.29574500 | -0.48205500 |
| H | -5.16858300 | -1.41001800 | -0.47041100 |
| N | -0.61595000 | -0.19333700 | -3.44533700 |
| O | 0.60564200  | -0.04324800 | -3.06693100 |
| O | -0.92829200 | -0.37266300 | -4.61264800 |
| O | -1.50565100 | -0.14567900 | -2.50184500 |
| N | 0.76664400  | 0.76602400  | 2.24806400  |
| O | -0.01878400 | 1.52258100  | 1.56905700  |
| O | 1.04025700  | 0.98418300  | 3.42193300  |
| O | 1.26387600  | -0.24528400 | 1.61056000  |
| C | -7.13899200 | -1.54151100 | 2.87958500  |
| H | -7.68507100 | -1.58585300 | 3.82761800  |
| C | -3.84765300 | 4.68210900  | -0.37763600 |
| H | -4.72174300 | 5.23046000  | -0.01356700 |
| C | -2.96909700 | 5.27075500  | -1.24816300 |
| H | -3.13618000 | 6.29534600  | -1.59474100 |
| C | 0.42279500  | 3.12803700  | -2.48245400 |
| H | 1.30026700  | 2.53460400  | -2.74923000 |
| C | 0.11239600  | -5.11799400 | -2.33703200 |
| C | -1.08407000 | -4.45278200 | -2.12371500 |
| N | 0.08123600  | -2.47152400 | -1.36131600 |
| C | 1.26314200  | -3.11440000 | -1.57578100 |
| C | 1.33410400  | -4.45330800 | -2.06811400 |
| C | 2.49559200  | -2.39947400 | -1.30486600 |
| C | 3.74943700  | -3.04293700 | -1.54487300 |
| N | 2.41027600  | -1.12690900 | -0.85015100 |
| C | 3.53262600  | -0.44617200 | -0.58756000 |
| C | 4.81905100  | -0.99290500 | -0.81291500 |
| C | 4.92014400  | -2.28706400 | -1.29568100 |
| C | 3.26540600  | 0.99216200  | -0.19799900 |
| O | 2.20282300  | 1.51712400  | -0.61538200 |

|    |             |             |             |
|----|-------------|-------------|-------------|
| N  | 4.18277700  | 1.70469600  | 0.50998700  |
| C  | 5.17301900  | 1.08701900  | 1.35717700  |
| C  | 3.97241200  | 3.17074000  | 0.66490500  |
| C  | 3.18727900  | 3.54274900  | 1.92412200  |
| C  | 6.52602400  | 1.44972200  | 1.24001600  |
| C  | 5.74834700  | -0.43573100 | 3.15133600  |
| C  | 4.78116900  | 0.15041000  | 2.32670700  |
| H  | 0.12647000  | -6.14394900 | -2.71821300 |
| H  | -2.04474800 | -4.92901900 | -2.33412100 |
| H  | 5.71447700  | -0.40267300 | -0.61541300 |
| H  | 5.90200300  | -2.72973700 | -1.48978000 |
| H  | 3.45279300  | 3.51544500  | -0.23901700 |
| H  | 4.97379000  | 3.62797100  | 0.68145100  |
| H  | 3.14521700  | 4.63965500  | 2.01843600  |
| H  | 3.66635900  | 3.14591800  | 2.83200000  |
| H  | 2.15521800  | 3.16817800  | 1.87774800  |
| H  | 6.83670700  | 2.17406900  | 0.48068800  |
| H  | 5.43114500  | -1.16380200 | 3.90490000  |
| H  | 3.72337200  | -0.10628000 | 2.43948600  |
| C  | 3.77764600  | -4.39083900 | -2.03556000 |
| H  | 4.74716600  | -4.86659900 | -2.21155000 |
| C  | 2.61430400  | -5.06986300 | -2.28411500 |
| H  | 2.64243800  | -6.09707400 | -2.66059400 |
| C  | -1.04900500 | -3.12929200 | -1.63674100 |
| H  | -1.97418700 | -2.56900100 | -1.48104300 |
| C  | -7.85545400 | -1.42892000 | 1.67084000  |
| C  | 7.10823300  | -0.09292200 | 3.04797200  |
| C  | -9.36533700 | -1.40337900 | 1.66663400  |
| H  | -9.77661200 | -2.42085300 | 1.78564000  |
| H  | -9.76356000 | -0.79736800 | 2.49558500  |
| H  | -9.76449300 | -0.99693000 | 0.72550400  |
| C  | 7.47677900  | 0.86161900  | 2.07808900  |
| H  | 8.52889100  | 1.14679500  | 1.97449700  |
| C  | 8.14130900  | -0.69676400 | 3.96943800  |
| H  | 9.08926400  | -0.89421700 | 3.44457400  |
| H  | 8.37167100  | -0.01248800 | 4.80457400  |
| H  | 7.79204700  | -1.64279900 | 4.40936300  |
| Eu | 0.07181600  | 0.15041900  | -0.59149400 |

TPSSH/6-311G\*-RECP

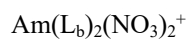

|   |             |             |             |
|---|-------------|-------------|-------------|
| C | -0.82903500 | 5.16849500  | -2.45002800 |
| C | 0.28226900  | 4.45491400  | -2.84461200 |
| N | -0.40585900 | 2.55201600  | -1.54334800 |
| C | -1.51906100 | 3.23184000  | -1.17503900 |
| C | -1.76784700 | 4.56511300  | -1.58663800 |
| C | -2.47930600 | 2.56605900  | -0.32637500 |
| C | -3.60988500 | 3.28832500  | 0.14177500  |
| N | -2.26257300 | 1.27378200  | -0.00182000 |
| C | -3.13145600 | 0.64533700  | 0.79456700  |
| C | -4.24238800 | 1.30342900  | 1.35876500  |
| C | -4.47810100 | 2.61983900  | 1.02532300  |
| C | -2.70941900 | -0.76762600 | 1.09372900  |
| O | -1.53639500 | -1.09468400 | 0.80769100  |
| N | -3.52128200 | -1.66340000 | 1.70075800  |
| C | -4.95552100 | -1.58189400 | 1.72414200  |
| C | -2.90300100 | -2.94688300 | 2.14392900  |
| C | -2.03933100 | -2.79213400 | 3.39307900  |
| C | -5.63921100 | -1.65611600 | 2.94130700  |
| C | -7.06427500 | -1.43108600 | 0.56014200  |
| C | -5.67213400 | -1.48390100 | 0.52980400  |
| H | -0.99198400 | 6.18522700  | -2.79394600 |
| H | 1.01917200  | 4.88201000  | -3.51468600 |
| H | -4.90037500 | 0.78981600  | 2.04480800  |
| H | -5.33041300 | 3.14590600  | 1.44334900  |
| H | -2.30764300 | -3.32988200 | 1.31291500  |
| H | -3.73259600 | -3.63199300 | 2.31763600  |
| H | -1.63375500 | -3.76848200 | 3.67156900  |
| H | -2.62132000 | -2.41598700 | 4.23803500  |
| H | -1.20099400 | -2.11799400 | 3.21373000  |
| H | -5.08418500 | -1.72869000 | 3.87085800  |
| H | -7.61011500 | -1.34945600 | -0.37509600 |
| H | -5.14286400 | -1.44891000 | -0.41743900 |
| N | -0.57222300 | -0.03584500 | -3.42333300 |
| O | 0.63517000  | 0.11003700  | -3.00639500 |
| O | -0.85173500 | -0.13905000 | -4.59401700 |
| O | -1.47041000 | -0.06581000 | -2.49564900 |
| N | 0.73745300  | 0.63496600  | 2.28575900  |
| O | -0.01944800 | 1.43266700  | 1.63211000  |
| O | 0.97629000  | 0.77479700  | 3.46657800  |
| O | 1.24171200  | -0.33322900 | 1.59850800  |
| C | -7.03026200 | -1.61387900 | 2.95484400  |

|   |             |             |             |
|---|-------------|-------------|-------------|
| H | -7.55107000 | -1.66675900 | 3.90644000  |
| C | -3.81553000 | 4.64185300  | -0.27435500 |
| H | -4.68912900 | 5.17204900  | 0.09075400  |
| C | -2.93652300 | 5.24986400  | -1.11765500 |
| H | -3.10220500 | 6.27259300  | -1.44131200 |
| C | 0.46088900  | 3.14999100  | -2.35672600 |
| H | 1.33086800  | 2.56575200  | -2.62825400 |
| C | 0.02150600  | -4.94878600 | -2.52494300 |
| C | -1.15911800 | -4.27662700 | -2.28983800 |
| N | 0.02769000  | -2.36359500 | -1.43450200 |
| C | 1.19455600  | -3.01419100 | -1.67032400 |
| C | 1.24661900  | -4.32070500 | -2.21796900 |
| C | 2.42658900  | -2.33414500 | -1.35698700 |
| C | 3.66550700  | -2.98160100 | -1.60243500 |
| N | 2.35130500  | -1.08425700 | -0.85262600 |
| C | 3.47515500  | -0.44016600 | -0.53765900 |
| C | 4.74945900  | -0.99716400 | -0.76002500 |
| C | 4.83876700  | -2.26283500 | -1.29878500 |
| C | 3.22642300  | 0.97687000  | -0.09407200 |
| O | 2.17908200  | 1.52566100  | -0.50263800 |
| N | 4.13474800  | 1.64912800  | 0.64179100  |
| C | 5.11321700  | 0.99401000  | 1.46877600  |
| C | 3.93344300  | 3.10730800  | 0.85020700  |
| C | 3.12611200  | 3.42815200  | 2.10507900  |
| C | 6.46195100  | 1.35018200  | 1.37053100  |
| C | 5.66313500  | -0.58804900 | 3.20105700  |
| C | 4.70837500  | 0.03173800  | 2.39644600  |
| H | 0.02061400  | -5.94795900 | -2.94933800 |
| H | -2.11865500 | -4.72176400 | -2.52568600 |
| H | 5.64201500  | -0.43543000 | -0.51996700 |
| H | 5.80892200  | -2.70899000 | -1.49321300 |
| H | 3.43857200  | 3.48778100  | -0.04231300 |
| H | 4.93150300  | 3.54611500  | 0.90814400  |
| H | 3.09422900  | 4.51234100  | 2.24370200  |
| H | 3.58219100  | 2.98790200  | 2.99469200  |
| H | 2.10135500  | 3.06594900  | 2.01737900  |
| H | 6.77772100  | 2.09495300  | 0.64633800  |
| H | 5.33937300  | -1.33511400 | 3.91969800  |
| H | 3.65656500  | -0.21926600 | 2.49225500  |
| C | 3.67952000  | -4.30271100 | -2.15343500 |
| H | 4.63644900  | -4.78115500 | -2.33512300 |
| C | 2.51611200  | -4.94612300 | -2.44758000 |
| H | 2.53195500  | -5.94682900 | -2.86758500 |
| C | -1.10724400 | -2.98328600 | -1.74497500 |

|    |             |             |             |
|----|-------------|-------------|-------------|
| H  | -2.01575300 | -2.41992100 | -1.57154500 |
| C  | -7.76872400 | -1.49739900 | 1.76808800  |
| C  | 7.01909100  | -0.25277700 | 3.11681300  |
| C  | -9.27636700 | -1.48051300 | 1.79520700  |
| H  | -9.67269800 | -2.49808000 | 1.87945400  |
| H  | -9.65394000 | -0.91364100 | 2.64973100  |
| H  | -9.68881100 | -1.04116200 | 0.88472600  |
| C  | 7.39954900  | 0.72832800  | 2.18883600  |
| H  | 8.44574600  | 1.00705900  | 2.10197100  |
| C  | 8.04045100  | -0.89587400 | 4.02103200  |
| H  | 8.98521400  | -1.06774800 | 3.49913900  |
| H  | 8.25606100  | -0.25174700 | 4.88031600  |
| H  | 7.68546700  | -1.85287000 | 4.40891300  |
| Am | 0.06753500  | 0.16032200  | -0.56523600 |

Cm(L<sub>b</sub>)<sub>2</sub>(NO<sub>3</sub>)<sub>2</sub><sup>+</sup>

|   |             |             |             |
|---|-------------|-------------|-------------|
| C | -0.80937200 | 5.00184300  | -2.74018000 |
| C | 0.27048700  | 4.23904800  | -3.13073800 |
| N | -0.43547600 | 2.41597900  | -1.72795200 |
| C | -1.52028500 | 3.14388200  | -1.36470300 |
| C | -1.74242100 | 4.46426300  | -1.82863300 |
| C | -2.48239000 | 2.54259800  | -0.47077100 |
| C | -3.58405900 | 3.31204000  | -0.01132900 |
| N | -2.29426800 | 1.25966200  | -0.10604200 |
| C | -3.16520200 | 0.67783700  | 0.71866300  |
| C | -4.24818700 | 1.38357200  | 1.28119800  |
| C | -4.45276800 | 2.69588000  | 0.90991600  |
| C | -2.77458000 | -0.74220700 | 1.03709100  |
| O | -1.61953300 | -1.11102400 | 0.72817700  |
| N | -3.59613200 | -1.60161000 | 1.68010800  |
| C | -5.02600600 | -1.47301800 | 1.74440300  |
| C | -3.00769900 | -2.89641700 | 2.13094000  |
| C | -2.11301700 | -2.74890900 | 3.35899600  |
| C | -5.67416200 | -1.49822800 | 2.98264100  |
| C | -7.16242300 | -1.28304000 | 0.63921600  |
| C | -5.77422800 | -1.38019500 | 0.56918100  |
| H | -0.95214200 | 6.00689900  | -3.12505500 |
| H | 1.00091900  | 4.61412800  | -3.83796200 |
| H | -4.90870800 | 0.91200500  | 1.99444800  |
| H | -5.28316200 | 3.25764200  | 1.32570700  |
| H | -2.44184900 | -3.31006800 | 1.29428800  |
| H | -3.85371100 | -3.55320600 | 2.33245800  |
| H | -1.73296300 | -3.73318300 | 3.64553400  |

|   |             |             |             |
|---|-------------|-------------|-------------|
| H | -2.66467700 | -2.34064200 | 4.20932600  |
| H | -1.25760000 | -2.10513200 | 3.15101800  |
| H | -5.09397000 | -1.56686300 | 3.89698200  |
| H | -7.73334400 | -1.20609900 | -0.28131700 |
| H | -5.27197700 | -1.38478500 | -0.39322300 |
| N | -0.59518700 | -0.34485200 | -3.42413500 |
| O | 0.60558900  | -0.10510800 | -3.01950700 |
| O | -0.86174900 | -0.53130000 | -4.58727300 |
| O | -1.48899700 | -0.37361600 | -2.49626500 |
| N | 0.65684700  | 0.59961300  | 2.27064000  |
| O | -0.07754100 | 1.38545600  | 1.57269000  |
| O | 0.86782500  | 0.78155500  | 3.45170600  |
| O | 1.16549400  | -0.39439700 | 1.63042700  |
| C | -7.06231500 | -1.41219000 | 3.03586600  |
| H | -7.55586100 | -1.42706600 | 4.00319100  |
| C | -3.75953100 | 4.65369500  | -0.47741600 |
| H | -4.61002400 | 5.22416200  | -0.11843400 |
| C | -2.88131700 | 5.20063000  | -1.36298400 |
| H | -3.02569000 | 6.21346400  | -1.72566400 |
| C | 0.42574200  | 2.95247900  | -2.58916200 |
| H | 1.27115600  | 2.33195200  | -2.85837400 |
| C | 0.30480900  | -5.14746400 | -2.24465100 |
| C | -0.90909700 | -4.52688000 | -2.04050900 |
| N | 0.17533700  | -2.51070900 | -1.29175400 |
| C | 1.37440700  | -3.11095300 | -1.49778700 |
| C | 1.49528000  | -4.44075000 | -1.97402700 |
| C | 2.57187800  | -2.35579200 | -1.22062500 |
| C | 3.84305900  | -2.95424100 | -1.42242200 |
| N | 2.43216800  | -1.08877300 | -0.78373700 |
| C | 3.51699100  | -0.37920600 | -0.48177100 |
| C | 4.82055800  | -0.88140900 | -0.66218600 |
| C | 4.97647100  | -2.16443200 | -1.14280300 |
| C | 3.18268100  | 1.03549200  | -0.08949500 |
| O | 2.10996300  | 1.51073500  | -0.52796600 |
| N | 4.03484200  | 1.78070600  | 0.64096000  |
| C | 5.03757700  | 1.20585300  | 1.49889000  |
| C | 3.74536300  | 3.22959100  | 0.80844600  |
| C | 2.93022900  | 3.53616500  | 2.06179800  |
| C | 6.36520900  | 1.63382400  | 1.40778400  |
| C | 5.64887100  | -0.29786400 | 3.27977200  |
| C | 4.67324700  | 0.24768400  | 2.44770200  |
| H | 0.35627700  | -6.16641100 | -2.61564400 |
| H | -1.84413600 | -5.03376600 | -2.24859700 |
| H | 5.68253900  | -0.26812500 | -0.43656000 |



|    |             |             |             |
|----|-------------|-------------|-------------|
| H  | 5.96931800  | -2.57142800 | -1.30625800 |
| H  | 3.22064100  | 3.55110900  | -0.09004600 |
| H  | 4.71497500  | 3.73062200  | 0.84353700  |
| H  | 2.82623200  | 4.61976000  | 2.16528100  |
| H  | 3.42465600  | 3.15823500  | 2.95962500  |
| H  | 1.93172700  | 3.10231800  | 1.99918300  |
| H  | 6.64978800  | 2.37555200  | 0.66777300  |
| H  | 5.35660000  | -1.04282000 | 4.01393300  |
| H  | 3.63583100  | -0.05895500 | 2.53828100  |
| C  | 3.92539700  | -4.29957600 | -1.90423900 |
| H  | 4.90521000  | -4.74060700 | -2.05637000 |
| C  | 2.79575100  | -5.01268400 | -2.16861300 |
| H  | 2.86232800  | -6.03197900 | -2.53564600 |
| C  | -0.92548100 | -3.20581400 | -1.56353900 |
| H  | -1.86179900 | -2.68385900 | -1.41153100 |
| C  | -7.83192200 | -1.29988600 | 1.86874300  |
| C  | 6.98609600  | 0.10841600  | 3.20171900  |
| C  | -9.33693900 | -1.23654500 | 1.93899400  |
| H  | -9.76156100 | -2.24145500 | 2.03678500  |
| H  | -9.67242000 | -0.65701500 | 2.80246000  |
| H  | -9.76179800 | -0.78658500 | 1.03941200  |
| C  | 7.32447700  | 1.08481100  | 2.25339000  |
| H  | 8.35504000  | 1.41779800  | 2.17152700  |
| C  | 8.02727800  | -0.45594000 | 4.13541800  |
| H  | 9.00831000  | -0.50784500 | 3.65722500  |
| H  | 8.13076500  | 0.17488800  | 5.02496000  |
| H  | 7.75865600  | -1.45859100 | 4.47490900  |
| Cm | 0.06229600  | 0.08793400  | -0.59961300 |

Eu(L<sub>b</sub>)<sub>2</sub>(NO<sub>3</sub>)<sub>2</sub><sup>+</sup>

|   |             |             |             |
|---|-------------|-------------|-------------|
| C | -0.78937900 | 5.00821800  | -2.78130900 |
| C | 0.29638000  | 4.24938600  | -3.16330400 |
| N | -0.40925000 | 2.42697300  | -1.75999500 |
| C | -1.49697800 | 3.15138900  | -1.40320600 |
| C | -1.72446700 | 4.46913300  | -1.87265700 |
| C | -2.45730500 | 2.54656700  | -0.50998700 |
| C | -3.56775300 | 3.31055100  | -0.06135200 |
| N | -2.26240700 | 1.26593000  | -0.13594500 |
| C | -3.13901800 | 0.68173800  | 0.68289400  |
| C | -4.23006400 | 1.38434300  | 1.23315900  |
| C | -4.43926500 | 2.69401000  | 0.85637100  |
| C | -2.74968500 | -0.73689600 | 1.00903400  |
| O | -1.59545800 | -1.10549900 | 0.70566700  |

|   |             |             |             |
|---|-------------|-------------|-------------|
| N | -3.57592200 | -1.59332600 | 1.65327600  |
| C | -5.00642100 | -1.46917400 | 1.70505700  |
| C | -2.98893300 | -2.88742500 | 2.10770500  |
| C | -2.09493900 | -2.73922200 | 3.33613400  |
| C | -5.66468900 | -1.49234900 | 2.93810500  |
| C | -7.13519100 | -1.29014100 | 0.58263100  |
| C | -5.74608100 | -1.38282900 | 0.52388300  |
| H | -0.93520800 | 6.01117700  | -3.17050200 |
| H | 1.02883000  | 4.62611400  | -3.86765600 |
| H | -4.89354400 | 0.91063400  | 1.94218500  |
| H | -5.27568400 | 3.25282300  | 1.26397900  |
| H | -2.42264300 | -3.30386500 | 1.27260200  |
| H | -3.83562200 | -3.54306300 | 2.31025700  |
| H | -1.72150200 | -3.72439600 | 3.62829700  |
| H | -2.64491900 | -2.32273600 | 4.18357700  |
| H | -1.23506500 | -2.10236500 | 3.12581900  |
| H | -5.09132400 | -1.55620400 | 3.85712100  |
| H | -7.69914800 | -1.21817100 | -0.34261000 |
| H | -5.23649600 | -1.38842200 | -0.43467900 |
| N | -0.58327600 | -0.29789300 | -3.41984200 |
| O | 0.61981800  | -0.09846000 | -3.01257000 |
| O | -0.85135300 | -0.47024800 | -4.58637900 |
| O | -1.48070100 | -0.30384500 | -2.49998500 |
| N | 0.66039500  | 0.54661500  | 2.23755600  |
| O | -0.09596700 | 1.33019000  | 1.56685100  |
| O | 0.87576300  | 0.70540700  | 3.42174300  |
| O | 1.18622000  | -0.41801400 | 1.57309900  |
| C | -7.05349700 | -1.41114500 | 2.98024600  |
| H | -7.55455600 | -1.42467500 | 3.94374900  |
| C | -3.74943500 | 4.64933600  | -0.53364000 |
| H | -4.60632100 | 5.21445400  | -0.18143000 |
| C | -2.87006700 | 5.20001200  | -1.41558300 |
| H | -3.01938500 | 6.21080200  | -1.78200500 |
| C | 0.45381000  | 2.96453900  | -2.61717900 |
| H | 1.30259000  | 2.34563800  | -2.88041000 |
| C | 0.27966300  | -5.09908000 | -2.34943900 |
| C | -0.93382800 | -4.48769300 | -2.11684400 |
| N | 0.15285200  | -2.48137200 | -1.34608400 |
| C | 1.35052000  | -3.07183800 | -1.58027600 |
| C | 1.47095600  | -4.39203200 | -2.08292300 |
| C | 2.54669300  | -2.31477400 | -1.30429000 |
| C | 3.81803600  | -2.90404200 | -1.53312100 |
| N | 2.40845700  | -1.05621100 | -0.84009800 |
| C | 3.49569100  | -0.35112800 | -0.53355300 |

|    |             |             |             |
|----|-------------|-------------|-------------|
| C  | 4.79809500  | -0.84619400 | -0.73944500 |
| C  | 4.95248700  | -2.11736500 | -1.25038900 |
| C  | 3.16511400  | 1.05338100  | -0.10355900 |
| O  | 2.09011500  | 1.53730900  | -0.52017900 |
| N  | 4.02553300  | 1.78001800  | 0.63840700  |
| C  | 5.03644600  | 1.18551600  | 1.47233600  |
| C  | 3.73380400  | 3.22313100  | 0.84504800  |
| C  | 2.91860100  | 3.49514600  | 2.10646500  |
| C  | 6.36189100  | 1.62079800  | 1.38259600  |
| C  | 5.66801400  | -0.36223200 | 3.20827800  |
| C  | 4.68384700  | 0.20082700  | 2.39820600  |
| H  | 0.33018800  | -6.11086600 | -2.73968300 |
| H  | -1.86951100 | -4.99522900 | -2.32068200 |
| H  | 5.66036300  | -0.23532000 | -0.50829100 |
| H  | 5.94440900  | -2.51789300 | -1.43416800 |
| H  | 3.20766000  | 3.56781200  | -0.04404400 |
| H  | 4.70223000  | 3.72529900  | 0.89300800  |
| H  | 2.81379200  | 4.57540900  | 2.23968900  |
| H  | 3.41303100  | 3.09289400  | 2.99365900  |
| H  | 1.92011300  | 3.06306200  | 2.03205000  |
| H  | 6.63776800  | 2.38295700  | 0.66025700  |
| H  | 5.38460100  | -1.12783300 | 3.92448300  |
| H  | 3.64873900  | -0.11359800 | 2.48760200  |
| C  | 3.90017900  | -4.23924100 | -2.04278300 |
| H  | 4.88036500  | -4.67164300 | -2.21593100 |
| C  | 2.77117000  | -4.95349500 | -2.30626900 |
| H  | 2.83835100  | -5.96519500 | -2.69368600 |
| C  | -0.94823300 | -3.17549200 | -1.61491000 |
| H  | -1.88425200 | -2.65965200 | -1.43988900 |
| C  | -7.81435600 | -1.30531700 | 1.80678600  |
| C  | 7.00280700  | 0.05222100  | 3.13159200  |
| C  | -9.32009300 | -1.24661800 | 1.86528000  |
| H  | -9.74192500 | -2.25150100 | 1.97459400  |
| H  | -9.66384500 | -0.65594600 | 2.71793700  |
| H  | -9.74002700 | -0.81101600 | 0.95638200  |
| C  | 7.32985700  | 1.05443300  | 2.20656700  |
| H  | 8.35833800  | 1.39408000  | 2.12571900  |
| C  | 8.05326500  | -0.53126200 | 4.04288000  |
| H  | 9.03047000  | -0.56850300 | 3.55554700  |
| H  | 8.16225400  | 0.07823800  | 4.94652600  |
| H  | 7.79049500  | -1.54269100 | 4.36021600  |
| Eu | 0.06521100  | 0.10291000  | -0.61504600 |

## B3LYP/6-311G\*-RECP

Am(L<sub>b</sub>)<sub>2</sub>(NO<sub>3</sub>)<sub>2</sub><sup>+</sup>

|   |             |             |             |
|---|-------------|-------------|-------------|
| C | -0.86188200 | 5.16086700  | -2.51258600 |
| C | 0.23763600  | 4.44088800  | -2.92034600 |
| N | -0.43969300 | 2.55414800  | -1.59730100 |
| C | -1.54371100 | 3.23802900  | -1.21469200 |
| C | -1.79016400 | 4.56921200  | -1.63154500 |
| C | -2.50086800 | 2.58482700  | -0.34691600 |
| C | -3.61825800 | 3.32105900  | 0.12850500  |
| N | -2.29901500 | 1.29531200  | -0.01342500 |
| C | -3.16147600 | 0.67864700  | 0.79221200  |
| C | -4.25995600 | 1.35085000  | 1.36111400  |
| C | -4.48341700 | 2.66628400  | 1.02263000  |
| C | -2.75374000 | -0.74458200 | 1.09793600  |
| O | -1.58635700 | -1.07932600 | 0.81696400  |
| N | -3.57839900 | -1.63137200 | 1.69812600  |
| C | -5.01393300 | -1.53867400 | 1.71110200  |
| C | -2.98006300 | -2.92176400 | 2.14680300  |
| C | -2.12298500 | -2.78615100 | 3.40223500  |
| C | -5.70638100 | -1.56636800 | 2.92375300  |
| C | -7.11511700 | -1.42351000 | 0.53174400  |
| C | -5.72411800 | -1.48141400 | 0.51260500  |
| H | -1.02442500 | 6.17606600  | -2.86025700 |
| H | 0.96580100  | 4.85960300  | -3.60457300 |
| H | -4.91955300 | 0.85096200  | 2.05330400  |
| H | -5.32677000 | 3.20285800  | 1.44469700  |
| H | -2.38551100 | -3.31963400 | 1.32313100  |
| H | -3.81575500 | -3.59953700 | 2.31470300  |
| H | -1.73492100 | -3.76847300 | 3.68353100  |
| H | -2.70162900 | -2.40324700 | 4.24599700  |
| H | -1.27100000 | -2.12696100 | 3.23467700  |
| H | -5.15859500 | -1.60834300 | 3.85895000  |
| H | -7.65410500 | -1.37318600 | -0.40910800 |
| H | -5.19166700 | -1.48166700 | -0.43280300 |
| N | -0.61462200 | -0.16753200 | -3.44589600 |
| O | 0.59141800  | 0.02899600  | -3.05971700 |
| O | -0.91292600 | -0.31722300 | -4.60352300 |
| O | -1.49160300 | -0.19600500 | -2.50208500 |
| N | 0.76872000  | 0.71658500  | 2.28615400  |
| O | 0.01414400  | 1.49748800  | 1.61715400  |
| O | 1.03737600  | 0.90355200  | 3.45104400  |
| O | 1.24115700  | -0.28638400 | 1.63340000  |

|   |             |             |             |
|---|-------------|-------------|-------------|
| C | -7.09575100 | -1.51854800 | 2.92829500  |
| H | -7.62184500 | -1.53577000 | 3.87783400  |
| C | -3.81757400 | 4.67398500  | -0.29404100 |
| H | -4.68168900 | 5.21403500  | 0.07804600  |
| C | -2.94691100 | 5.26689400  | -1.15098100 |
| H | -3.10845800 | 6.28835800  | -1.47946300 |
| C | 0.41582700  | 3.13896300  | -2.42653700 |
| H | 1.27994900  | 2.55171900  | -2.70926300 |
| C | 0.11199300  | -5.10717100 | -2.29408100 |
| C | -1.07737900 | -4.44471100 | -2.09136500 |
| N | 0.07986400  | -2.47607300 | -1.33946900 |
| C | 1.25717100  | -3.11446100 | -1.54428100 |
| C | 1.32720100  | -4.44568700 | -2.02460400 |
| C | 2.48489500  | -2.40125100 | -1.27340100 |
| C | 3.72887700  | -3.04494400 | -1.49836600 |
| N | 2.40478000  | -1.13137200 | -0.82976500 |
| C | 3.51889700  | -0.45798600 | -0.56080900 |
| C | 4.79630800  | -1.00869200 | -0.77231700 |
| C | 4.89442400  | -2.29754300 | -1.24549800 |
| C | 3.26227100  | 0.97930300  | -0.16989900 |
| O | 2.21754000  | 1.50228500  | -0.60473600 |
| N | 4.15399700  | 1.67832100  | 0.55845200  |
| C | 5.13320300  | 1.06174800  | 1.41731700  |
| C | 3.94401900  | 3.14142400  | 0.71687600  |
| C | 3.11715800  | 3.51218900  | 1.94456300  |
| C | 6.48443800  | 1.39031100  | 1.28360600  |
| C | 5.68407300  | -0.40371600 | 3.24780300  |
| C | 4.72965900  | 0.17102700  | 2.41181200  |
| H | 0.12622900  | -6.12652400 | -2.66631600 |
| H | -2.02974500 | -4.91631400 | -2.30201400 |
| H | 5.68508200  | -0.42800400 | -0.57271500 |
| H | 5.86772400  | -2.74150600 | -1.42717400 |
| H | 3.46527000  | 3.49609000  | -0.19412800 |
| H | 4.93752700  | 3.58897900  | 0.77349400  |
| H | 3.07787500  | 4.60077600  | 2.03741200  |
| H | 3.55804800  | 3.11631100  | 2.86153300  |
| H | 2.09419300  | 3.14475300  | 1.86251400  |
| H | 6.80197800  | 2.08106300  | 0.50906500  |
| H | 5.35769500  | -1.09500300 | 4.01842400  |
| H | 3.67798200  | -0.06353100 | 2.53722800  |
| C | 3.75748000  | -4.39310800 | -1.97975700 |
| H | 4.71939400  | -4.86700200 | -2.14402800 |
| C | 2.60415200  | -5.06507900 | -2.22996200 |
| H | 2.63105000  | -6.08567300 | -2.59728200 |

|    |             |             |             |
|----|-------------|-------------|-------------|
| C  | -1.04368300 | -3.12522600 | -1.61402700 |
| H  | -1.96178900 | -2.57014100 | -1.46883100 |
| C  | -7.82676300 | -1.44336200 | 1.73512700  |
| C  | 7.04172400  | -0.09424800 | 3.12784400  |
| C  | -9.33412200 | -1.41928700 | 1.75361800  |
| H  | -9.73867600 | -2.42835500 | 1.88397400  |
| H  | -9.71635300 | -0.81136100 | 2.57690700  |
| H  | -9.74326000 | -1.02205200 | 0.82301900  |
| C  | 7.42308700  | 0.81428900  | 2.13113000  |
| H  | 8.47105100  | 1.07333500  | 2.01483500  |
| C  | 8.06489900  | -0.68771300 | 4.06300000  |
| H  | 9.00443500  | -0.90245500 | 3.54836900  |
| H  | 8.29542700  | 0.00499200  | 4.87912200  |
| H  | 7.70821000  | -1.61508700 | 4.51491000  |
| Am | 0.06735300  | 0.13677000  | -0.57755300 |

Cm(L<sub>6</sub>)<sub>2</sub>(NO<sub>3</sub>)<sub>2</sub><sup>+</sup>

|   |             |             |             |
|---|-------------|-------------|-------------|
| C | -0.81779300 | 5.01916600  | -2.74189800 |
| C | 0.24248000  | 4.24589500  | -3.15705900 |
| N | -0.46018400 | 2.42915500  | -1.75119300 |
| C | -1.52912800 | 3.16524500  | -1.36367800 |
| C | -1.74133000 | 4.48988800  | -1.81740100 |
| C | -2.48856700 | 2.57294500  | -0.45631100 |
| C | -3.57212600 | 3.35661700  | 0.01928400  |
| N | -2.31998900 | 1.28886000  | -0.09491600 |
| C | -3.18609700 | 0.71526700  | 0.73459200  |
| C | -4.25369000 | 1.43377600  | 1.30721000  |
| C | -4.44051500 | 2.74902100  | 0.94408500  |
| C | -2.81313200 | -0.71562700 | 1.05392300  |
| O | -1.66162600 | -1.08945600 | 0.75608900  |
| N | -3.65243700 | -1.56766300 | 1.68210600  |
| C | -5.08414600 | -1.42994800 | 1.71654500  |
| C | -3.08724800 | -2.86868700 | 2.14225500  |
| C | -2.20683300 | -2.73986500 | 3.38216400  |
| C | -5.75762300 | -1.41825500 | 2.93995000  |
| C | -7.19868700 | -1.26820300 | 0.56756600  |
| C | -5.81066100 | -1.36912700 | 0.52802500  |
| H | -0.95357900 | 6.02795900  | -3.11856300 |
| H | 0.96393700  | 4.61482400  | -3.87614300 |
| H | -4.91736000 | 0.97075100  | 2.02099300  |
| H | -5.25889000 | 3.32081700  | 1.36914900  |
| H | -2.51808300 | -3.29792900 | 1.31661800  |
| H | -3.94056200 | -3.51771200 | 2.33333900  |

|   |             |             |             |
|---|-------------|-------------|-------------|
| H | -1.84619000 | -3.72936300 | 3.67460800  |
| H | -2.75991000 | -2.32432000 | 4.22760500  |
| H | -1.33672800 | -2.11149700 | 3.19073600  |
| H | -5.19685000 | -1.46294000 | 3.86730800  |
| H | -7.75054200 | -1.21598800 | -0.36569100 |
| H | -5.29288000 | -1.40185800 | -0.42491100 |
| N | -0.65771400 | -0.44440700 | -3.42286900 |
| O | 0.54171500  | -0.16488400 | -3.05278500 |
| O | -0.94608200 | -0.66047300 | -4.57201000 |
| O | -1.52564500 | -0.47889900 | -2.47523900 |
| N | 0.71537900  | 0.67880500  | 2.26625700  |
| O | -0.01658500 | 1.44948400  | 1.55513900  |
| O | 0.97133600  | 0.91299600  | 3.42597700  |
| O | 1.17489000  | -0.35597300 | 1.66249600  |
| C | -7.14476000 | -1.32799000 | 2.96484000  |
| H | -7.65619400 | -1.31494800 | 3.92241000  |
| C | -3.73372000 | 4.70355900  | -0.43757100 |
| H | -4.57048000 | 5.28445700  | -0.06442500 |
| C | -2.86219500 | 5.24071000  | -1.33035000 |
| H | -2.99680600 | 6.25714300  | -1.68553100 |
| C | 0.38950900  | 2.95523000  | -2.62503100 |
| H | 1.22205700  | 2.32741100  | -2.91560200 |
| C | 0.33350800  | -5.27826100 | -2.01218000 |
| C | -0.88097300 | -4.65602700 | -1.83349300 |
| N | 0.19659200  | -2.60409900 | -1.19175200 |
| C | 1.39795800  | -3.20390200 | -1.37342000 |
| C | 1.52130300  | -4.55426100 | -1.78428200 |
| C | 2.59817800  | -2.43089100 | -1.14435300 |
| C | 3.86736500  | -3.03636300 | -1.33246100 |
| N | 2.46705200  | -1.14626200 | -0.76723800 |
| C | 3.55009900  | -0.41993200 | -0.51771300 |
| C | 4.85046200  | -0.92790400 | -0.69461900 |
| C | 5.00115900  | -2.23210100 | -1.10983900 |
| C | 3.22232600  | 1.01520800  | -0.17673000 |
| O | 2.15241600  | 1.47095400  | -0.63023700 |
| N | 4.06870600  | 1.78117200  | 0.53601800  |
| C | 5.07835700  | 1.24132700  | 1.41168300  |
| C | 3.78159400  | 3.23517200  | 0.65592100  |
| C | 2.95797100  | 3.59667600  | 1.88857500  |
| C | 6.41182300  | 1.62878300  | 1.26205600  |
| C | 5.70093700  | -0.13556900 | 3.28728300  |
| C | 4.71895900  | 0.36653500  | 2.43675200  |
| H | 0.38816300  | -6.31370800 | -2.33269700 |
| H | -1.81413500 | -5.17674800 | -2.01209200 |

|    |             |             |             |
|----|-------------|-------------|-------------|
| H  | 5.71511100  | -0.30577100 | -0.51463900 |
| H  | 5.99225300  | -2.64542700 | -1.26583500 |
| H  | 3.26827200  | 3.53530800  | -0.25562800 |
| H  | 4.75031400  | 3.73712300  | 0.68048800  |
| H  | 2.85459300  | 4.68353200  | 1.94580400  |
| H  | 3.44114800  | 3.26056500  | 2.80814500  |
| H  | 1.95785900  | 3.16539100  | 1.84254100  |
| H  | 6.69442500  | 2.30788400  | 0.46406300  |
| H  | 5.40916100  | -0.81603200 | 4.08104400  |
| H  | 3.67975900  | 0.08700100  | 2.57474300  |
| C  | 3.94904800  | -4.40468900 | -1.74576800 |
| H  | 4.92842100  | -4.84980300 | -1.88576900 |
| C  | 2.82219800  | -5.13171200 | -1.96144900 |
| H  | 2.88883100  | -6.16765900 | -2.27718800 |
| C  | -0.90025100 | -3.31370300 | -1.42307500 |
| H  | -1.83970000 | -2.79186300 | -1.29453900 |
| C  | -7.89167700 | -1.24855000 | 1.78191300  |
| C  | 7.04267200  | 0.23174500  | 3.15055400  |
| C  | -9.39721600 | -1.17938600 | 1.82248500  |
| H  | -9.82979000 | -2.17645900 | 1.95542200  |
| H  | -9.74914200 | -0.56316700 | 2.65301400  |
| H  | -9.80777800 | -0.76715000 | 0.89901300  |
| C  | 7.37858300  | 1.12419800  | 2.12351800  |
| H  | 8.41313300  | 1.42723100  | 1.99436500  |
| C  | 8.09486900  | -0.28492700 | 4.09896600  |
| H  | 9.04627900  | -0.45685300 | 3.59024200  |
| H  | 8.28392300  | 0.43542700  | 4.90172600  |
| H  | 7.78915700  | -1.22173300 | 4.56846900  |
| Cm | 0.05880900  | 0.06813200  | -0.60241400 |

Eu(L<sub>b</sub>)<sub>2</sub>(NO<sub>3</sub>)<sub>2</sub><sup>+</sup>

|   |             |             |             |
|---|-------------|-------------|-------------|
| C | -0.77610600 | 5.03042400  | -2.77506600 |
| C | 0.29113900  | 4.26099600  | -3.17988500 |
| N | -0.41894200 | 2.44041100  | -1.78342700 |
| C | -1.49194300 | 3.17313100  | -1.40524100 |
| C | -1.70641000 | 4.49704100  | -1.85980700 |
| C | -2.45383100 | 2.57408900  | -0.50628000 |
| C | -3.54755400 | 3.35024900  | -0.04142300 |
| N | -2.27862300 | 1.29049700  | -0.14302700 |
| C | -3.15164100 | 0.71067200  | 0.67693300  |
| C | -4.22935300 | 1.42288700  | 1.23769200  |
| C | -4.42119900 | 2.73719400  | 0.87402200  |
| C | -2.77517200 | -0.71922000 | 0.99436800  |



|   |             |             |             |
|---|-------------|-------------|-------------|
| O | -1.62786000 | -1.08961800 | 0.68136000  |
| N | -3.60438100 | -1.57371000 | 1.63372300  |
| C | -5.03580100 | -1.44120900 | 1.68950300  |
| C | -3.02961300 | -2.87561300 | 2.07997700  |
| C | -2.12284400 | -2.75135600 | 3.30123400  |
| C | -5.69014000 | -1.42411800 | 2.92325400  |
| C | -7.16878400 | -1.29370500 | 0.57286500  |
| C | -5.78118700 | -1.39035600 | 0.51229000  |
| H | -0.91202700 | 6.03875900  | -3.15290400 |
| H | 1.01814700  | 4.63319000  | -3.89172600 |
| H | -4.89767300 | 0.95502200  | 1.94366700  |
| H | -5.24764400 | 3.30321800  | 1.29109500  |
| H | -2.47854500 | -3.30420200 | 1.24165800  |
| H | -3.87931200 | -3.52420400 | 2.28807500  |
| H | -1.76858900 | -3.74406100 | 3.59074100  |
| H | -2.65397200 | -2.32562300 | 4.15566300  |
| H | -1.24893700 | -2.13497300 | 3.08979000  |
| H | -5.11443600 | -1.46100300 | 3.84178000  |
| H | -7.73544800 | -1.24908400 | -0.35187000 |
| H | -5.27818400 | -1.42614000 | -0.44841900 |
| N | -0.61634200 | -0.36426200 | -3.43470700 |
| O | 0.58409200  | -0.12507100 | -3.04646500 |
| O | -0.89591900 | -0.55678100 | -4.59094100 |
| O | -1.49685000 | -0.38603800 | -2.50062800 |
| N | 0.69651900  | 0.61239500  | 2.20968400  |
| O | -0.04282000 | 1.39292300  | 1.52028200  |
| O | 0.95174800  | 0.81936500  | 3.37506800  |
| O | 1.16467500  | -0.40130700 | 1.58008100  |
| C | -7.07704300 | -1.33852800 | 2.96936400  |
| H | -7.57350700 | -1.32125100 | 3.93472400  |
| C | -3.71291400 | 4.69663400  | -0.49917100 |
| H | -4.55717200 | 5.27149300  | -0.13364900 |
| C | -2.83610800 | 5.24071900  | -1.38255800 |
| H | -2.97375800 | 6.25683100  | -1.73754100 |
| C | 0.43725100  | 2.96988600  | -2.64789800 |
| H | 1.27287400  | 2.34313900  | -2.93214000 |
| C | 0.29384200  | -5.20818900 | -2.17334000 |
| C | -0.91904200 | -4.58720800 | -1.97881700 |
| N | 0.16344100  | -2.55436900 | -1.28837900 |
| C | 1.36198300  | -3.15223100 | -1.48644000 |
| C | 1.48344600  | -4.49228400 | -1.92974500 |
| C | 2.56087900  | -2.38496900 | -1.23846500 |
| C | 3.83002500  | -2.98668100 | -1.43876600 |
| N | 2.42924900  | -1.10945800 | -0.82902000 |

|    |             |             |             |
|----|-------------|-------------|-------------|
| C  | 3.51375100  | -0.39342100 | -0.55335000 |
| C  | 4.81347300  | -0.89896700 | -0.73950500 |
| C  | 4.96428100  | -2.19084800 | -1.19143900 |
| C  | 3.18611500  | 1.02998700  | -0.16933700 |
| O  | 2.11593700  | 1.49507200  | -0.60920000 |
| N  | 4.03151800  | 1.77617300  | 0.56623700  |
| C  | 5.04251600  | 1.21289300  | 1.42503800  |
| C  | 3.74005900  | 3.22514700  | 0.72852700  |
| C  | 2.91702500  | 3.54976600  | 1.97197600  |
| C  | 6.37464600  | 1.61011700  | 1.28869900  |
| C  | 5.67015100  | -0.22119400 | 3.25560300  |
| C  | 4.68638700  | 0.30401800  | 2.42118700  |
| H  | 0.34562200  | -6.23592400 | -2.51824500 |
| H  | -1.85345300 | -5.10165900 | -2.16892600 |
| H  | 5.67798600  | -0.28359400 | -0.53694100 |
| H  | 5.95530600  | -2.60112300 | -1.35562500 |
| H  | 3.22451600  | 3.54962800  | -0.17338300 |
| H  | 4.70720600  | 3.72941000  | 0.76603200  |
| H  | 2.81434200  | 4.63452400  | 2.06150000  |
| H  | 3.40061700  | 3.18614700  | 2.88078800  |
| H  | 1.91651000  | 3.12085100  | 1.91427400  |
| H  | 6.65489900  | 2.31552800  | 0.51302800  |
| H  | 5.38091000  | -0.92795200 | 4.02701200  |
| H  | 3.64852900  | 0.01501400  | 2.54893100  |
| C  | 3.91081400  | -4.34436400 | -1.88665900 |
| H  | 4.89022800  | -4.78612200 | -2.03663500 |
| C  | 2.78403000  | -5.06572900 | -2.12114400 |
| H  | 2.85078200  | -6.09363300 | -2.46215900 |
| C  | -0.93491500 | -3.25493100 | -1.53582100 |
| H  | -1.87251000 | -2.73264200 | -1.39507700 |
| C  | -7.84267500 | -1.26877200 | 1.79780300  |
| C  | 7.01034400  | 0.15601100  | 3.13188400  |
| C  | -9.34759900 | -1.20347700 | 1.86204300  |
| H  | -9.77449500 | -2.19853900 | 2.02486900  |
| H  | -9.68764400 | -0.56969200 | 2.68434400  |
| H  | -9.77502400 | -0.81334700 | 0.93666400  |
| C  | 7.34306300  | 1.08239900  | 2.13426500  |
| H  | 8.37640900  | 1.39373700  | 2.01552500  |
| C  | 8.06445000  | -0.38612700 | 4.06384900  |
| H  | 9.01233700  | -0.55246300 | 3.54663200  |
| H  | 8.26170200  | 0.31627500  | 4.88039400  |
| H  | 7.75606700  | -1.33093800 | 4.51513600  |
| Eu | 0.06205500  | 0.08696300  | -0.63848300 |

## M06-2X/6-311G\*-RECP

|   |             |             |             |
|---|-------------|-------------|-------------|
| C | -0.78115200 | 5.14869800  | -2.32943600 |
| C | 0.22626600  | 4.37041900  | -2.84321100 |
| N | -0.42896500 | 2.51882500  | -1.47193200 |
| C | -1.44576600 | 3.26581400  | -0.98744500 |
| C | -1.65830800 | 4.60093700  | -1.37307300 |
| C | -2.36086000 | 2.65632400  | -0.04714500 |
| C | -3.41586300 | 3.41462600  | 0.49643000  |
| N | -2.17368500 | 1.36532500  | 0.26899900  |
| C | -3.01197700 | 0.76633200  | 1.09055500  |
| C | -4.07800200 | 1.44139400  | 1.71155100  |
| C | -4.26552400 | 2.77003800  | 1.41470000  |
| C | -2.61367500 | -0.66562500 | 1.36487300  |
| O | -1.41346500 | -0.95920800 | 1.26287200  |
| N | -3.52591600 | -1.58092400 | 1.72530900  |
| C | -4.92794100 | -1.42278200 | 1.47669900  |
| C | -3.03223500 | -2.89742200 | 2.18705200  |
| C | -2.42908600 | -2.82471100 | 3.58220400  |
| C | -5.84422300 | -1.65227500 | 2.50072100  |
| C | -6.73359200 | -0.90162300 | -0.02119500 |
| C | -5.37204700 | -1.06437700 | 0.20891800  |
| H | -0.91611000 | 6.17503500  | -2.65463900 |
| H | 0.90924000  | 4.75186400  | -3.59131000 |
| H | -4.72900500 | 0.92849800  | 2.40700900  |
| H | -5.07124700 | 3.32707600  | 1.88083500  |
| H | -2.28952100 | -3.24981800 | 1.46859500  |
| H | -3.88530300 | -3.57397100 | 2.15550700  |
| H | -2.09685500 | -3.81618200 | 3.89358400  |
| H | -3.15953800 | -2.46790200 | 4.31058500  |
| H | -1.56589900 | -2.15901900 | 3.59589100  |
| H | -5.49279600 | -1.93478300 | 3.48753200  |
| H | -7.07178800 | -0.61476400 | -1.01104900 |
| H | -4.65554900 | -0.90510200 | -0.59203000 |
| N | -1.00178600 | -0.38651600 | -3.08896300 |
| O | 0.23277000  | -0.16016900 | -2.91880700 |
| O | -1.45850100 | -0.76150800 | -4.12516300 |
| O | -1.73699600 | -0.19762500 | -2.05534300 |
| N | 1.20560900  | 1.10076100  | 2.13681900  |
| O | 0.29857300  | 1.74735600  | 1.54180800  |
| O | 1.69839500  | 1.46238400  | 3.16554100  |
| O | 1.58412900  | 0.02849300  | 1.55220300  |

|   |             |             |             |
|---|-------------|-------------|-------------|
| C | -7.19982100 | -1.50047600 | 2.25188000  |
| H | -7.91141500 | -1.67685700 | 3.05222400  |
| C | -3.57975200 | 4.78506100  | 0.10535900  |
| H | -4.39298000 | 5.35558100  | 0.53998700  |
| C | -2.74215600 | 5.34794300  | -0.79627200 |
| H | -2.87438400 | 6.38011400  | -1.10200200 |
| C | 0.37110100  | 3.05322700  | -2.37802700 |
| H | 1.16398000  | 2.41400100  | -2.74785400 |
| C | -0.46712400 | -5.18588800 | -1.59941400 |
| C | -1.57597300 | -4.39433200 | -1.42569800 |
| N | -0.20463600 | -2.47171900 | -1.00706600 |
| C | 0.89037200  | -3.24236900 | -1.18565200 |
| C | 0.81423300  | -4.61524200 | -1.48391200 |
| C | 2.19285400  | -2.62044500 | -1.07590700 |
| C | 3.35314500  | -3.39156700 | -1.28028600 |
| N | 2.24463700  | -1.30712300 | -0.80321400 |
| C | 3.41573500  | -0.70309900 | -0.70717000 |
| C | 4.62997300  | -1.38211500 | -0.90899700 |
| C | 4.58864700  | -2.72603100 | -1.19609100 |
| C | 3.28084400  | 0.79491600  | -0.52100300 |
| O | 2.23563400  | 1.32461300  | -0.93332100 |
| N | 4.27222600  | 1.52067700  | 0.00272900  |
| C | 5.29342700  | 0.96409200  | 0.84462500  |
| C | 4.12924100  | 2.99259800  | 0.00254700  |
| C | 3.28469000  | 3.49109900  | 1.16609500  |
| C | 6.63343300  | 1.18329000  | 0.53469400  |
| C | 5.94153300  | -0.30176300 | 2.77541900  |
| C | 4.93937100  | 0.23393400  | 1.97359900  |
| H | -0.56460200 | -6.24095000 | -1.83312300 |
| H | -2.57736000 | -4.79396000 | -1.52239000 |
| H | 5.57403600  | -0.85879600 | -0.84755300 |
| H | 5.50694200  | -3.27775200 | -1.36657600 |
| H | 3.68993100  | 3.27748900  | -0.95306900 |
| H | 5.14053000  | 3.39671800  | 0.05191700  |
| H | 3.32998000  | 4.58064200  | 1.21231500  |
| H | 3.65232000  | 3.09817500  | 2.11604600  |
| H | 2.23979900  | 3.20293700  | 1.04374900  |
| H | 6.89692200  | 1.75253600  | -0.35101800 |
| H | 5.66428400  | -0.87313700 | 3.65517800  |
| H | 3.89088700  | 0.09237800  | 2.21844500  |
| C | 3.23561600  | -4.79100900 | -1.57711200 |
| H | 4.14197800  | -5.36667900 | -1.72802500 |
| C | 2.01952700  | -5.37561200 | -1.67186800 |
| H | 1.93099800  | -6.43217700 | -1.89995900 |

|    |             |             |             |
|----|-------------|-------------|-------------|
| C  | -1.39416700 | -3.03410000 | -1.13203800 |
| H  | -2.24905700 | -2.37583100 | -1.01234500 |
| C  | -7.66750700 | -1.11636900 | 0.99090100  |
| C  | 7.29002600  | -0.10483700 | 2.48140100  |
| C  | -9.14418900 | -0.96331300 | 0.74334500  |
| H  | -9.65428700 | -1.92460500 | 0.84004100  |
| H  | -9.59411200 | -0.28064200 | 1.46731700  |
| H  | -9.34391100 | -0.57664800 | -0.25591000 |
| C  | 7.61931200  | 0.64835100  | 1.34979200  |
| H  | 8.66321600  | 0.81552700  | 1.10482300  |
| C  | 8.36928800  | -0.65074200 | 3.37722300  |
| H  | 9.24722200  | -0.95235000 | 2.80382000  |
| H  | 8.69110300  | 0.10913200  | 4.09438500  |
| H  | 8.01904800  | -1.51328600 | 3.94497700  |
| Am | 0.07200500  | 0.15380900  | -0.42811400 |

Cm(L<sub>6</sub>)<sub>2</sub>(NO<sub>3</sub>)<sub>2</sub><sup>+</sup>

|   |             |             |             |
|---|-------------|-------------|-------------|
| C | -0.86180600 | 5.01078100  | -2.65373900 |
| C | 0.20328000  | 4.25982800  | -3.08621100 |
| N | -0.46745200 | 2.41945100  | -1.70843400 |
| C | -1.53932200 | 3.13664100  | -1.30658400 |
| C | -1.77186100 | 4.45544200  | -1.73358800 |
| C | -2.48179800 | 2.51650800  | -0.39886400 |
| C | -3.56397100 | 3.26790600  | 0.10015100  |
| N | -2.28491900 | 1.23313900  | -0.06409600 |
| C | -3.12046900 | 0.63463400  | 0.76597100  |
| C | -4.19316000 | 1.31763700  | 1.36910000  |
| C | -4.40689500 | 2.63241100  | 1.02723500  |
| C | -2.69963800 | -0.79327900 | 1.05124700  |
| O | -1.53439700 | -1.11510800 | 0.76932700  |
| N | -3.52090500 | -1.68877400 | 1.61596100  |
| C | -4.94454900 | -1.54745500 | 1.68361500  |
| C | -2.93103100 | -2.98561000 | 2.02462000  |
| C | -2.03428400 | -2.85406000 | 3.24746700  |
| C | -5.58518500 | -1.61925400 | 2.91781600  |
| C | -7.06219000 | -1.20712900 | 0.60235600  |
| C | -5.68288400 | -1.36032700 | 0.52157200  |
| H | -1.01387500 | 6.02322600  | -3.01319400 |
| H | 0.91561000  | 4.64894300  | -3.80226400 |
| H | -4.83551000 | 0.83259900  | 2.08958600  |
| H | -5.22700600 | 3.18490200  | 1.47327200  |
| H | -2.36574700 | -3.37878900 | 1.17728100  |
| H | -3.76906900 | -3.65432000 | 2.21604700  |

|   |             |             |             |
|---|-------------|-------------|-------------|
| H | -1.64209400 | -3.83505600 | 3.52047400  |
| H | -2.58772900 | -2.46303900 | 4.10309400  |
| H | -1.18901600 | -2.19663200 | 3.04341000  |
| H | -5.00204700 | -1.76379700 | 3.82107100  |
| H | -7.63191100 | -1.05169100 | -0.30763000 |
| H | -5.17803600 | -1.32497800 | -0.43855500 |
| N | -0.66504800 | -0.41706800 | -3.39325000 |
| O | 0.52592800  | -0.12495200 | -3.04755900 |
| O | -0.95315100 | -0.69718900 | -4.51695500 |
| O | -1.52723700 | -0.39744200 | -2.45474200 |
| N | 0.80146400  | 0.77628400  | 2.20153200  |
| O | -0.03486700 | 1.45751000  | 1.53829700  |
| O | 1.11870800  | 1.05870000  | 3.32299400  |
| O | 1.30170700  | -0.22356600 | 1.59363800  |
| C | -6.96346700 | -1.47723300 | 2.98207700  |
| H | -7.45950000 | -1.52852600 | 3.94598900  |
| C | -3.75270900 | 4.62221100  | -0.33469400 |
| H | -4.59509600 | 5.18108500  | 0.05736200  |
| C | -2.90188200 | 5.18343200  | -1.22436100 |
| H | -3.05203100 | 6.20220100  | -1.56480700 |
| C | 0.37036700  | 2.96327800  | -2.57486700 |
| H | 1.21093700  | 2.34866400  | -2.87489800 |
| C | 0.25325600  | -5.15881500 | -2.09211000 |
| C | -0.94979100 | -4.52189900 | -1.90910600 |
| N | 0.15530400  | -2.50173700 | -1.24041800 |
| C | 1.34204800  | -3.11935900 | -1.42874300 |
| C | 1.44914400  | -4.45708300 | -1.84947400 |
| C | 2.55123900  | -2.36565000 | -1.18129700 |
| C | 3.80684600  | -2.98047500 | -1.34848500 |
| N | 2.42529800  | -1.08539400 | -0.80191400 |
| C | 3.50427400  | -0.37608400 | -0.52897800 |
| C | 4.80314400  | -0.89461300 | -0.66999700 |
| C | 4.94494800  | -2.19589800 | -1.09028600 |
| C | 3.17649000  | 1.06340200  | -0.19536800 |
| O | 2.12841200  | 1.53087000  | -0.67385000 |
| N | 4.01078200  | 1.80617500  | 0.53634500  |
| C | 4.97309800  | 1.23183000  | 1.43483500  |
| C | 3.71164000  | 3.24456300  | 0.70062900  |
| C | 2.73258600  | 3.49891800  | 1.83684300  |
| C | 6.31107100  | 1.60788500  | 1.34688500  |
| C | 5.50144500  | -0.24744500 | 3.24688900  |
| C | 4.55784000  | 0.31674100  | 2.39532500  |
| H | 0.29468600  | -6.19052700 | -2.42554900 |
| H | -1.88986700 | -5.02432800 | -2.09723500 |

|    |             |             |             |
|----|-------------|-------------|-------------|
| H  | 5.66903300  | -0.28234900 | -0.45853200 |
| H  | 5.93245800  | -2.62484500 | -1.22349600 |
| H  | 3.31751100  | 3.60558800  | -0.24851600 |
| H  | 4.66760200  | 3.73500700  | 0.88701800  |
| H  | 2.65004000  | 4.57192200  | 2.01844900  |
| H  | 3.06993800  | 3.02479400  | 2.76072700  |
| H  | 1.74061800  | 3.12090000  | 1.58780500  |
| H  | 6.62473600  | 2.32112500  | 0.59140100  |
| H  | 5.17513100  | -0.96311100 | 3.99421200  |
| H  | 3.50735200  | 0.05132500  | 2.47284000  |
| C  | 3.87629900  | -4.34819700 | -1.77750000 |
| H  | 4.85213200  | -4.80319600 | -1.90654400 |
| C  | 2.74652500  | -5.05244000 | -2.01906100 |
| H  | 2.79921300  | -6.08479500 | -2.34730900 |
| C  | -0.95005400 | -3.18549600 | -1.47958900 |
| H  | -1.88178800 | -2.64840400 | -1.34198700 |
| C  | -7.72404900 | -1.26290200 | 1.82853900  |
| C  | 6.84887100  | 0.10097100  | 3.16959000  |
| C  | -9.22106100 | -1.13468300 | 1.91463600  |
| H  | -9.68192400 | -2.11747300 | 2.04343700  |
| H  | -9.51730600 | -0.52065500 | 2.76674800  |
| H  | -9.63725200 | -0.68909800 | 1.01103500  |
| C  | 7.23714900  | 1.04057200  | 2.20960900  |
| H  | 8.28091900  | 1.32847100  | 2.13582000  |
| C  | 7.85963700  | -0.48367800 | 4.11945900  |
| H  | 8.81613300  | -0.65881300 | 3.62439800  |
| H  | 8.04174200  | 0.20077700  | 4.95217200  |
| H  | 7.51283400  | -1.42899000 | 4.53773800  |
| Cm | 0.07480000  | 0.10716200  | -0.61178700 |

Eu(L<sub>b</sub>)<sub>2</sub>(NO<sub>3</sub>)<sub>2</sub><sup>+</sup>

|   |             |             |             |
|---|-------------|-------------|-------------|
| C | -0.71254200 | 4.93242800  | -2.82510600 |
| C | 0.34275000  | 4.14881600  | -3.22305100 |
| N | -0.37580800 | 2.36324300  | -1.79835300 |
| C | -1.43654400 | 3.11264200  | -1.43032300 |
| C | -1.64177800 | 4.42159300  | -1.89903600 |
| C | -2.39732100 | 2.53566400  | -0.51478900 |
| C | -3.47263300 | 3.31851400  | -0.05070900 |
| N | -2.22317100 | 1.25982200  | -0.14218200 |
| C | -3.07813100 | 0.69800800  | 0.69441700  |
| C | -4.14436600 | 1.41633600  | 1.26733100  |
| C | -4.33430400 | 2.72400900  | 0.88587500  |
| C | -2.68435700 | -0.73025100 | 1.01434500  |
| O | -1.53361300 | -1.08505600 | 0.71909100  |

|   |             |             |             |
|---|-------------|-------------|-------------|
| N | -3.51380100 | -1.59156900 | 1.62146900  |
| C | -4.93321700 | -1.42268200 | 1.70680300  |
| C | -2.94377000 | -2.88830400 | 2.05688600  |
| C | -2.00694700 | -2.74115700 | 3.24756600  |
| C | -5.55506000 | -1.44171900 | 2.95225300  |
| C | -7.06199900 | -1.08180600 | 0.64761800  |
| C | -5.68719700 | -1.26159200 | 0.55077000  |
| H | -0.84184300 | 5.93603500  | -3.21677200 |
| H | 1.06932600  | 4.50384900  | -3.94250700 |
| H | -4.80144000 | 0.96433800  | 1.99565000  |
| H | -5.14984400 | 3.30192100  | 1.30736700  |
| H | -2.41606100 | -3.32680900 | 1.20734600  |
| H | -3.79270100 | -3.52684800 | 2.29707900  |
| H | -1.65565800 | -3.72579100 | 3.56026800  |
| H | -2.51720500 | -2.28061300 | 4.09540500  |
| H | -1.13690800 | -2.13753000 | 2.98958300  |
| H | -4.95936800 | -1.56431600 | 3.85061600  |
| H | -7.64385200 | -0.94670900 | -0.25799200 |
| H | -5.19657900 | -1.26536300 | -0.41729900 |
| N | -0.68613700 | -0.50966900 | -3.34800200 |
| O | 0.51641600  | -0.23650100 | -3.03967000 |
| O | -1.00520000 | -0.85377200 | -4.44631100 |
| O | -1.53007700 | -0.40723400 | -2.39788300 |
| N | 0.82148800  | 0.75421200  | 2.11019900  |
| O | -0.01051600 | 1.43887900  | 1.44498700  |
| O | 1.18307400  | 1.07003500  | 3.20930200  |
| O | 1.26491000  | -0.28592400 | 1.52888100  |
| C | -6.92984400 | -1.27452800 | 3.03320200  |
| H | -7.41094100 | -1.28380100 | 4.00588800  |
| C | -3.63483000 | 4.66187200  | -0.52868200 |
| H | -4.47269800 | 5.24573400  | -0.16440200 |
| C | -2.76520900 | 5.18255600  | -1.42481000 |
| H | -2.89527100 | 6.19276300  | -1.79752800 |
| C | 0.48040600  | 2.86495100  | -2.67174200 |
| H | 1.31105700  | 2.22527700  | -2.94524100 |
| C | 0.06609100  | -5.17278100 | -2.13263600 |
| C | -1.11695700 | -4.49582800 | -1.93879900 |
| N | 0.06828700  | -2.52207500 | -1.25348600 |
| C | 1.21536100  | -3.15924600 | -1.44834200 |
| C | 1.29175000  | -4.51158900 | -1.88228300 |
| C | 2.46302200  | -2.39996000 | -1.18818800 |
| C | 3.73796500  | -3.07689100 | -1.33559900 |
| N | 2.35384200  | -1.15912700 | -0.83643400 |
| C | 3.48767700  | -0.42752100 | -0.52464500 |



|    |             |             |             |
|----|-------------|-------------|-------------|
| C  | 4.77014600  | -0.98832700 | -0.63420200 |
| C  | 4.91052900  | -2.28774300 | -1.04081600 |
| C  | 3.17064500  | 0.98743900  | -0.23717700 |
| O  | 2.09744500  | 1.44529400  | -0.68999300 |
| N  | 4.02333000  | 1.77185500  | 0.44227900  |
| C  | 4.98946400  | 1.23990800  | 1.35868600  |
| C  | 3.71922100  | 3.21278100  | 0.54756700  |
| C  | 2.76564200  | 3.51537900  | 1.69460200  |
| C  | 6.32605000  | 1.61531400  | 1.25137000  |
| C  | 5.53191800  | -0.16445500 | 3.22740900  |
| C  | 4.58338300  | 0.36119700  | 2.35814900  |
| H  | 0.07345000  | -6.20125100 | -2.47713500 |
| H  | -2.07168700 | -4.96860000 | -2.13065400 |
| H  | 5.64389800  | -0.39186700 | -0.40787000 |
| H  | 5.89127700  | -2.73551300 | -1.14995800 |
| H  | 3.29990400  | 3.52940900  | -0.40669700 |
| H  | 4.67513200  | 3.71874600  | 0.68869300  |
| H  | 2.67740100  | 4.59544600  | 1.82647100  |
| H  | 3.13131900  | 3.08875000  | 2.63097100  |
| H  | 1.77162400  | 3.11532300  | 1.49221300  |
| H  | 6.63368700  | 2.29682400  | 0.46493900  |
| H  | 5.21199000  | -0.85021300 | 4.00500500  |
| H  | 3.53492100  | 0.09311700  | 2.45010500  |
| C  | 3.76883100  | -4.37554400 | -1.75055100 |
| H  | 4.72165700  | -4.87841200 | -1.87437900 |
| C  | 2.54468400  | -5.11955300 | -2.04207900 |
| H  | 2.61257600  | -6.14554600 | -2.37999500 |
| C  | -1.07786300 | -3.17224000 | -1.49421000 |
| H  | -1.98479900 | -2.59957600 | -1.34712000 |
| C  | -7.70511000 | -1.08628200 | 1.88517900  |
| C  | 6.87848700  | 0.18541800  | 3.13068300  |
| C  | -9.19860000 | -0.93219700 | 1.98858100  |
| H  | -9.67459900 | -1.90761300 | 2.11887900  |
| H  | -9.47532300 | -0.31622700 | 2.84568900  |
| H  | -9.61707400 | -0.47684000 | 1.09085500  |
| C  | 7.25870100  | 1.08661600  | 2.13249100  |
| H  | 8.30110400  | 1.37458100  | 2.04168600  |
| C  | 7.89408600  | -0.35798400 | 4.09992200  |
| H  | 8.85855400  | -0.52103600 | 3.61636900  |
| H  | 8.05347000  | 0.34582500  | 4.92113100  |
| H  | 7.56483800  | -1.30282600 | 4.53347100  |
| Eu | 0.08685000  | 0.08992400  | -0.64126000 |

## PBE0/ZORA

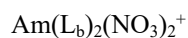

|   |                   |                   |                   |
|---|-------------------|-------------------|-------------------|
| C | -0.90830316255950 | 5.07529038509562  | -2.55616406663476 |
| C | 0.16693247930101  | 4.34433073743844  | -2.98747261115015 |
| N | -0.47089502092837 | 2.49387137217836  | -1.61613402394087 |
| C | -1.55134553024930 | 3.18714293686545  | -1.21425143770705 |
| C | -1.80543457190304 | 4.50455081676785  | -1.64074836026013 |
| C | -2.48164151884684 | 2.55191304950885  | -0.31909379622554 |
| C | -3.58158525319243 | 3.28884068303885  | 0.16929830794349  |
| N | -2.27089459220698 | 1.27376820800430  | 0.02120427300481  |
| C | -3.11958755963067 | 0.66885767666748  | 0.83343981523927  |
| C | -4.20491259120296 | 1.33673027600749  | 1.41533281590958  |
| C | -4.42901622412692 | 2.64596303737275  | 1.08007619805559  |
| C | -2.71383221368235 | -0.74093854200593 | 1.14992024575548  |
| O | -1.53398412100614 | -1.05839298394081 | 0.94489767286644  |
| N | -3.57068227011483 | -1.62464059279434 | 1.68509627257982  |
| C | -4.98763960922332 | -1.52986956659030 | 1.57433518883740  |
| C | -3.00979273288620 | -2.88899890086328 | 2.19242426761348  |
| C | -2.28255471634968 | -2.72875035780003 | 3.51235102860463  |
| C | -5.78633657394164 | -1.65686247628646 | 2.70499254579155  |
| C | -6.96131406735185 | -1.29206928830095 | 0.22728040493805  |
| C | -5.58155409126747 | -1.36345827376709 | 0.33068894159836  |
| H | -1.07872112659728 | 6.08505882638383  | -2.91338475641660 |
| H | 0.87308571337865  | 4.74529234864773  | -3.70301702438108 |
| H | -4.85251169696563 | 0.83127712851562  | 2.11610058362996  |
| H | -5.26091302613368 | 3.18944243027125  | 1.51382525876437  |
| H | -2.33077559568226 | -3.28435999124194 | 1.43436147166987  |
| H | -3.84812525055779 | -3.57814061913383 | 2.28688953813709  |
| H | -1.89847806024747 | -3.69836341826463 | 3.83515309676034  |
| H | -2.94735780330735 | -2.35406245927877 | 4.29279862939949  |
| H | -1.43665116788065 | -2.04765316277425 | 3.41690123167420  |
| H | -5.32924078566095 | -1.78725796217272 | 3.67916266786865  |
| H | -7.41170859310969 | -1.15571025840836 | -0.74992083964699 |
| H | -4.96435140754048 | -1.28857374944876 | -0.55791765054098 |
| N | -0.68104530817301 | -0.27172543638088 | -3.33057442904345 |
| O | 0.52071359998854  | -0.06607916511698 | -2.99205148267564 |
| O | -1.00801296305223 | -0.45842191731830 | -4.46768057759807 |
| O | -1.52512188709787 | -0.26836231565267 | -2.37899486486518 |
| N | 0.81060586182664  | 0.83074428937124  | 2.26030958297990  |
| O | 0.04631073122768  | 1.56885042084179  | 1.58107205288620  |

|   |                   |                   |                   |
|---|-------------------|-------------------|-------------------|
| O | 1.09396006583584  | 1.07087501353425  | 3.40282723582265  |
| O | 1.27638251974644  | -0.18438019204147 | 1.65542459192395  |
| C | -7.16344369442517 | -1.59714464015407 | 2.58587346796932  |
| H | -7.77586205337777 | -1.69170328263423 | 3.47619830250187  |
| C | -3.78658546336364 | 4.63226289777004  | -0.25803827798957 |
| H | -4.63967306100257 | 5.17654937204159  | 0.13028618081707  |
| C | -2.94006103803659 | 5.21012042312647  | -1.14004021438604 |
| H | -3.10491961064962 | 6.22728392471350  | -1.47737621171381 |
| C | 0.35358274797503  | 3.05567733866028  | -2.47862111306929 |
| H | 1.20513747385931  | 2.45927635086029  | -2.78256680163509 |
| C | 0.10627400680510  | -5.13379538876003 | -2.02547244304052 |
| C | -1.07737013327219 | -4.47322177696304 | -1.82615657561907 |
| N | 0.07679972977784  | -2.47886176564943 | -1.18258764748042 |
| C | 1.24517053417315  | -3.11508084749786 | -1.38626110777930 |
| C | 1.31542959666926  | -4.45642584044864 | -1.81003567593073 |
| C | 2.4659523351635   | -2.38649502343768 | -1.17291822510155 |
| C | 3.70238695440012  | -3.02717754506329 | -1.39419357652692 |
| N | 2.38288934182208  | -1.10707563576842 | -0.78456894610559 |
| C | 3.49062089786122  | -0.42191135221959 | -0.56609851690043 |
| C | 4.76347570966260  | -0.96695549903776 | -0.77614560397043 |
| C | 4.86252181321877  | -2.26700333522884 | -1.19683417540064 |
| C | 3.23296315615401  | 1.01959736871843  | -0.23000224485436 |
| O | 2.17946192277443  | 1.51555869243403  | -0.65594025883506 |
| N | 4.13558967384206  | 1.74707312631992  | 0.43674734714605  |
| C | 5.14062888147151  | 1.17502842502199  | 1.27345741295866  |
| C | 3.92760831257690  | 3.19807094573784  | 0.54226009784175  |
| C | 3.16202927214461  | 3.60734682617587  | 1.78407137516748  |
| C | 6.47290399776900  | 1.53354260606422  | 1.10302481137998  |
| C | 5.76841795183617  | -0.24629607150282 | 3.09910208081209  |
| C | 4.78511112392738  | 0.29299139023386  | 2.28428729142809  |
| H | 0.12245506859403  | -6.16658877116750 | -2.35596746979884 |
| H | -2.03053187611155 | -4.95707410278742 | -1.99601867736298 |
| H | 5.64873176070444  | -0.36920788709176 | -0.61509291563951 |
| H | 5.83351349175093  | -2.71327329450467 | -1.38048293546124 |
| H | 3.40424479236477  | 3.51480546912691  | -0.35875143768390 |
| H | 4.91998394583044  | 3.65201009162635  | 0.53827950238399  |
| H | 3.12465612081800  | 4.69705270250869  | 1.84204671770826  |
| H | 3.64840001877995  | 3.24058457009417  | 2.68970666590479  |
| H | 2.13806179991702  | 3.23408620201853  | 1.76118277357227  |
| H | 6.75402001024537  | 2.22112292298095  | 0.31291936529521  |
| H | 5.48069002217864  | -0.93541749217544 | 3.88569145408409  |
| H | 3.74187552843122  | 0.03626202637133  | 2.43646309655949  |
| C | 3.73339949808711  | -4.38771428589485 | -1.81714033882795 |
| H | 4.69584375223811  | -4.85897987046135 | -1.97994773545174 |

|    |                   |                   |                   |
|----|-------------------|-------------------|-------------------|
| C  | 2.58540796500318  | -5.07401999121306 | -2.01509380821978 |
| H  | 2.60973357732351  | -6.10801111079094 | -2.34022713307128 |
| C  | -1.04107177758338 | -3.14115708511045 | -1.40494887963129 |
| H  | -1.96149533695246 | -2.58847398016393 | -1.26099182184803 |
| C  | -7.77779457031273 | -1.41024543870333 | 1.34801228140800  |
| C  | 7.10839523500515  | 0.09322807927500  | 2.94198581816124  |
| C  | -9.26924598170590 | -1.37341203157697 | 1.22851111035204  |
| H  | -9.67891522295880 | -2.38742127575721 | 1.19690680055686  |
| H  | -9.72473456736679 | -0.86729457859676 | 2.08137553927587  |
| H  | -9.58460396927854 | -0.86364034182166 | 0.31755787483131  |
| C  | 7.44117685593113  | 0.99340737754510  | 1.92966485559521  |
| H  | 8.47907357922766  | 1.27351759960652  | 1.78444708843035  |
| C  | 8.16015477091748  | -0.45930274442995 | 3.85249708147885  |
| H  | 9.09730917125728  | -0.63259765518760 | 3.32063678416376  |
| H  | 8.37331727493769  | 0.24153484034738  | 4.66522994473346  |
| H  | 7.84247275063827  | -1.39910695491495 | 4.30546429503640  |
| Am | 0.06848815535137  | 0.13649432040790  | -0.52456364738674 |

Cm(L<sub>b</sub>)<sub>2</sub>(NO<sub>3</sub>)<sub>2</sub><sup>+</sup>

|   |                   |                   |                   |
|---|-------------------|-------------------|-------------------|
| C | -0.82799182919694 | 5.04008254125817  | -2.60952820692699 |
| C | 0.21795217303730  | 4.27787361948292  | -3.05915712283159 |
| N | -0.46690424074632 | 2.43536815888817  | -1.69907539586396 |
| C | -1.52060427402651 | 3.16063885587298  | -1.28092923622002 |
| C | -1.73467892004943 | 4.49008362813163  | -1.69104273307787 |
| C | -2.46446000734993 | 2.54832478207889  | -0.38384817683333 |
| C | -3.53271259711939 | 3.31519981976705  | 0.12660179481427  |
| N | -2.29249047726075 | 1.26132802843337  | -0.06587823472427 |
| C | -3.14513183491906 | 0.67073902467951  | 0.75038281815322  |
| C | -4.19964005870124 | 1.36623933170705  | 1.35802045519501  |
| C | -4.38707143721999 | 2.68644796971035  | 1.04100158069979  |
| C | -2.77209940598267 | -0.75781467534216 | 1.03009614154925  |
| O | -1.61778590937391 | -1.11501588483485 | 0.75386363751283  |
| N | -3.62248407386691 | -1.61900181549548 | 1.60828164394652  |
| C | -5.03993943205032 | -1.47638704844435 | 1.59614068448403  |
| C | -3.07494559862469 | -2.90725083744652 | 2.06876247403045  |
| C | -2.25272768064553 | -2.78544978971932 | 3.33611100063927  |
| C | -5.76003234491399 | -1.56054075710878 | 2.78210589647442  |
| C | -7.09373652690422 | -1.18703291764835 | 0.38715659293548  |
| C | -5.71331075173702 | -1.30584117906928 | 0.39452912256086  |
| H | -0.96773079065182 | 6.05862103882586  | -2.95504502781170 |
| H | 0.92993775767329  | 4.66219417087867  | -3.77800545071854 |
| H | -4.85313034470879 | 0.87625106102153  | 2.06393253949475  |

|   |                   |                   |                   |
|---|-------------------|-------------------|-------------------|
| H | -5.19553844724796 | 3.24937836959965  | 1.49389130596380  |
| H | -2.46625141961988 | -3.32258745336679 | 1.26329540604595  |
| H | -3.93041693306741 | -3.56500870293507 | 2.21759095972027  |
| H | -1.88976075765042 | -3.77270171738309 | 3.62853710039202  |
| H | -2.84650777547803 | -2.38815681195162 | 4.16135713452449  |
| H | -1.38664399135201 | -2.14060834773137 | 3.18605637799018  |
| H | -5.23929187792331 | -1.69373637786826 | 3.72339307622463  |
| H | -7.60742317150082 | -1.04790164971802 | -0.55789301672655 |
| H | -5.15684189101206 | -1.26513241821560 | -0.53536712146303 |
| N | -0.68817204293072 | -0.37951533123585 | -3.39759189373871 |
| O | 0.50378822043414  | -0.11928828512125 | -3.04744251985433 |
| O | -0.99087607982135 | -0.57600491387403 | -4.53933500589125 |
| O | -1.53715888864836 | -0.41938898113266 | -2.45526892305842 |
| N | 0.72247591718377  | 0.63699540215474  | 2.23095469876758  |
| O | 0.00651770599727  | 1.41551053050986  | 1.53888402735388  |
| O | 0.96590134935249  | 0.84891702578007  | 3.38897305379510  |
| O | 1.17870347088216  | -0.37719283060014 | 1.62391341836523  |
| C | -7.13921253341247 | -1.45286217726827 | 2.75909245355274  |
| H | -7.69022245760421 | -1.51333321840725 | 3.69151454756116  |
| C | -3.69668417857392 | 4.66948667468238  | -0.28423504007613 |
| H | -4.52610055811279 | 5.23904542832828  | 0.11892655906065  |
| C | -2.84030502629925 | 5.22731444325410  | -1.17000037076078 |
| H | -2.97434115934769 | 6.25303371427169  | -1.49489842758682 |
| C | 0.36707997250281  | 2.97906243060708  | -2.56471534948449 |
| H | 1.19519051355627  | 2.35845874231199  | -2.88467105111359 |
| C | 0.28391835094730  | -5.20213166801893 | -2.10022629653316 |
| C | -0.91949650187754 | -4.58155503072619 | -1.89189245270792 |
| N | 0.17091679376804  | -2.55606544494862 | -1.23251203244420 |
| C | 1.35821119108721  | -3.15388058736743 | -1.44446307479473 |
| C | 1.47106836983758  | -4.48827848810296 | -1.87985566582040 |
| C | 2.55725734787714  | -2.39190954650476 | -1.22246937880274 |
| C | 3.81421789521828  | -2.99250900718712 | -1.44056275417541 |
| N | 2.43276371469624  | -1.12156943505198 | -0.82340810737004 |
| C | 3.51436515186204  | -0.40770024781040 | -0.57836000983874 |
| C | 4.80652041151458  | -0.90957308642616 | -0.77964276989382 |
| C | 4.94851964119896  | -2.19930174795478 | -1.22116669088748 |
| C | 3.19657083067956  | 1.01379952346316  | -0.21114958546624 |
| O | 2.12878534704605  | 1.47967450485824  | -0.64016934834368 |
| N | 4.05423963055778  | 1.75658252879243  | 0.49443764362054  |
| C | 5.07044786272594  | 1.19796377032130  | 1.32723953128694  |
| C | 3.78430663364075  | 3.19339961418307  | 0.64673903188964  |
| C | 3.00250197925445  | 3.52748244304959  | 1.90078556678383  |
| C | 6.38983665793569  | 1.61149598760137  | 1.18588136853942  |
| C | 5.72787205658491  | -0.25264629466328 | 3.11903727114906  |

|    |                   |                   |                   |
|----|-------------------|-------------------|-------------------|
| C  | 4.73559299773065  | 0.27356121974537  | 2.30676716119441  |
| H  | 0.33232851682548  | -6.23088844189826 | -2.44007160029818 |
| H  | -1.85713890803279 | -5.09423044956782 | -2.06359986760741 |
| H  | 5.67207719013112  | -0.28942441728172 | -0.59686947762725 |
| H  | 5.93452592061618  | -2.61297750889293 | -1.40118406550026 |
| H  | 3.24703449191377  | 3.51591354584235  | -0.24385756860775 |
| H  | 4.75641704075124  | 3.68939298650678  | 0.65822666991197  |
| H  | 2.91421956094467  | 4.61194164856113  | 1.99220258942210  |
| H  | 3.50763634155353  | 3.15678223221983  | 2.79448484841332  |
| H  | 1.99735683177352  | 3.10664729246064  | 1.86684197159525  |
| H  | 6.65446960303310  | 2.33261607817356  | 0.42039398512405  |
| H  | 5.45645758353995  | -0.97546977563866 | 3.88074405769179  |
| H  | 3.70132088435700  | -0.02788326526814 | 2.43711681694759  |
| C  | 3.88756733560194  | -4.34639817378550 | -1.87895912038185 |
| H  | 4.86377954614880  | -4.78817486338677 | -2.04254858961057 |
| C  | 2.76046506753301  | -5.06367201949186 | -2.08874197390165 |
| H  | 2.81683967114466  | -6.09299220360295 | -2.42465920059427 |
| C  | -0.92557036971676 | -3.25282361040894 | -1.45806308303921 |
| H  | -1.86238004855599 | -2.73180859917043 | -1.30433189181615 |
| C  | -7.83237808240236 | -1.26061178206427 | 1.56435799540847  |
| C  | 7.05598547841553  | 0.14135088929648  | 2.99014457516790  |
| C  | -9.32636415536638 | -1.17152880198566 | 1.54950943845391  |
| H  | -9.77243741459254 | -2.17044418915492 | 1.56389198252780  |
| H  | -9.70213906623527 | -0.63718514951456 | 2.42375461734805  |
| H  | -9.68754429559347 | -0.66375792340498 | 0.65460193359170  |
| C  | 7.36729145769161  | 1.08329814538414  | 2.00954880150876  |
| H  | 8.39562432900155  | 1.40620933379881  | 1.88704399502868  |
| C  | 8.11644401748952  | -0.39920908708537 | 3.89769302849189  |
| H  | 9.06563282980733  | -0.52209774043789 | 3.37320728122093  |
| H  | 8.29376399859588  | 0.28437458302562  | 4.73339624639875  |
| H  | 7.82834845133497  | -1.36313607086535 | 4.31858042700944  |
| Cm | 0.05948947503818  | 0.07863466006805  | -0.60774142670866 |

Eu(L<sub>b</sub>)<sub>2</sub>(NO<sub>3</sub>)<sub>2</sub><sup>+</sup>

|   |                   |                  |                   |
|---|-------------------|------------------|-------------------|
| C | -0.85730359507198 | 5.08191856660574 | -2.55148809486470 |
| C | 0.21531495055827  | 4.34375657976554 | -2.97740629984924 |
| N | -0.44481216155305 | 2.49233271680549 | -1.61645501443892 |
| C | -1.52257164413609 | 3.19379959881186 | -1.22151722379405 |
| C | -1.76504236115181 | 4.51420724214126 | -1.64495416858196 |
| C | -2.46418591983680 | 2.56252511729100 | -0.33629100911876 |
| C | -3.56462803670698 | 3.30185459152303 | 0.14638347668675  |
| N | -2.26070609956508 | 1.28382941919351 | -0.00170303934923 |
| C | -3.11465522308206 | 0.67693396428633 | 0.80124443917461  |

|   |                   |                   |                   |
|---|-------------------|-------------------|-------------------|
| C | -4.20337705668631 | 1.34448400123119  | 1.37820243514038  |
| C | -4.42133888055410 | 2.65624111157621  | 1.04676582649526  |
| C | -2.70350047041158 | -0.73394598459509 | 1.10643823061564  |
| O | -1.52640482224265 | -1.04821354707074 | 0.87875330870829  |
| N | -3.54748694117398 | -1.62173635065569 | 1.65307673801343  |
| C | -4.96659253363087 | -1.52891184956844 | 1.56885288380228  |
| C | -2.97588043480084 | -2.88674637721294 | 2.14709265192025  |
| C | -2.22625251460725 | -2.72867618061007 | 3.45469805144392  |
| C | -5.74429000960620 | -1.64994993943423 | 2.71449631152472  |
| C | -6.96419813209357 | -1.30124716414376 | 0.25594919459435  |
| C | -5.58281787317533 | -1.37063730829240 | 0.33503729922095  |
| H | -1.01744533613974 | 6.09406537843211  | -2.90676541424493 |
| H | 0.92951213654299  | 4.74146663889325  | -3.68678608540845 |
| H | -4.85839250292446 | 0.83864938492490  | 2.07170128748715  |
| H | -5.25561526315625 | 3.19937317953505  | 1.47639552274343  |
| H | -2.30972286550085 | -3.27927511126879 | 1.37637635933438  |
| H | -3.81168551744153 | -3.57711700428724 | 2.25433766302878  |
| H | -1.83724611356849 | -3.69903125973860 | 3.76929841802731  |
| H | -2.87768661862224 | -2.35512374947913 | 4.24686528968863  |
| H | -1.38172969063548 | -2.04781660529703 | 3.34612335335975  |
| H | -5.26942428679950 | -1.77379145991231 | 3.68096493490354  |
| H | -7.43232485065936 | -1.17088727398636 | -0.71371368822025 |
| H | -4.98135184748623 | -1.29953848973214 | -0.56458724778833 |
| N | -0.67179161463749 | -0.25781598708372 | -3.29839997925626 |
| O | 0.52724566932227  | -0.04658309104298 | -2.95244461407633 |
| O | -0.99280893121756 | -0.43889335454303 | -4.43760653515859 |
| O | -1.51677327067739 | -0.26556938454699 | -2.34897027246802 |
| N | 0.77318191209451  | 0.77976412329484  | 2.22691127071442  |
| O | 0.03627473160242  | 1.53746272474776  | 1.53908520665897  |
| O | 1.03832097101838  | 1.00509064564560  | 3.37705891396871  |
| O | 1.23065584764417  | -0.23723812583653 | 1.62116444784280  |
| C | -7.12349786804671 | -1.59199977397792 | 2.61977531839056  |
| H | -7.71975152128093 | -1.68142784819857 | 3.52151325590317  |
| C | -3.75806940596187 | 4.64816083274422  | -0.27758954434728 |
| H | -4.61114206872686 | 5.19664719472750  | 0.10485434151352  |
| C | -2.90003313095923 | 5.22404745349816  | -1.15007866188851 |
| H | -3.05612396928683 | 6.24352335557184  | -1.48467363613246 |
| C | 0.38877333520380  | 3.05190443608351  | -2.47180954207798 |
| H | 1.23777781562184  | 2.45074239488359  | -2.77296752295467 |
| C | 0.08806303475844  | -5.13547052640874 | -2.03284140546836 |
| C | -1.09365525682949 | -4.46873152750204 | -1.84227950830816 |
| N | 0.06422317212566  | -2.47731630742729 | -1.19384698307147 |
| C | 1.22992094574260  | -3.12029398454513 | -1.39033626892035 |
| C | 1.29840158710170  | -4.46258836822106 | -1.81081113186794 |

|   |                   |                   |                   |
|---|-------------------|-------------------|-------------------|
| C | 2.45206225952275  | -2.39640339869468 | -1.17140955435804 |
| C | 3.68867675080466  | -3.04004339336184 | -1.38195286505511 |
| N | 2.36707154542358  | -1.11787431524095 | -0.78702158465604 |
| C | 3.47217514057187  | -0.43374954876753 | -0.55932934825092 |
| C | 4.74688534995133  | -0.97931766501783 | -0.75813448642507 |
| C | 4.84792214107269  | -2.28035703327512 | -1.17664725437143 |
| C | 3.20151816653272  | 1.00438068683501  | -0.22057715377918 |
| O | 2.13941640528110  | 1.48786000328309  | -0.64075694973388 |
| N | 4.09635156450240  | 1.74171131451003  | 0.44495533492535  |
| C | 5.10893256026904  | 1.17914986732454  | 1.27922074729555  |
| C | 3.87231537982657  | 3.18998203433199  | 0.55602202459195  |
| C | 3.12048749273125  | 3.58809378367214  | 1.80973838788932  |
| C | 6.43743782849042  | 1.54984231428380  | 1.10687261806291  |
| C | 5.75165301108186  | -0.23486248092468 | 3.10552989841860  |
| C | 4.76281693700039  | 0.29475152484884  | 2.29129510356720  |
| H | 0.10151376818671  | -6.16901145188137 | -2.36116591542765 |
| H | -2.04794051439682 | -4.94851850037696 | -2.01743187590281 |
| H | 5.63178903628300  | -0.38287090093712 | -0.59026699703756 |
| H | 5.82010553542680  | -2.72755782520616 | -1.35159313769520 |
| H | 3.33166688908975  | 3.50139516025092  | -0.33649114716151 |
| H | 4.85904079919776  | 3.65595705124582  | 0.53787017627035  |
| H | 3.06927163930336  | 4.67716691651955  | 1.86892837841609  |
| H | 3.62600794942271  | 3.22785059446434  | 2.70748139292187  |
| H | 2.10148152797410  | 3.20083026454753  | 1.80231904008523  |
| H | 6.71127063882966  | 2.23931700266015  | 0.31588426839834  |
| H | 5.47117135659283  | -0.92622273296203 | 3.89277050791530  |
| H | 3.72232424601982  | 0.02784601137765  | 2.44450422479876  |
| C | 3.71781828852980  | -4.40174128363263 | -1.80153465697354 |
| H | 4.67936719742390  | -4.87742088411415 | -1.95672945506859 |
| C | 2.56836703553131  | -5.08421197260985 | -2.00579922897483 |
| H | 2.59164146237865  | -6.11902328959078 | -2.32848721353896 |
| C | -1.05449261979316 | -3.13607180273881 | -1.42245076921953 |
| H | -1.97367965801711 | -2.57997119929837 | -1.28470822607177 |
| C | -7.76016080512983 | -1.41322804701111 | 1.39205946068684  |
| C | 7.08831733830584  | 0.11697409587280  | 2.94649737542729  |
| C | -9.25353301022195 | -1.37845130486541 | 1.29878525122351  |
| H | -9.66195895887690 | -2.39308846975441 | 1.27106693367258  |
| H | -9.69494922070264 | -0.87564472390977 | 2.16089810672413  |
| H | -9.58551186387958 | -0.86659762505670 | 0.39489870407874  |
| C | 7.41159252302250  | 1.01917873058699  | 1.93296281546979  |
| H | 8.44670307773625  | 1.30868350057295  | 1.78638286327650  |
| C | 8.14585840930645  | -0.42489380589960 | 3.85670258126764  |
| H | 9.08592700534453  | -0.58439580306257 | 3.32574595054643  |
| H | 8.34863734974818  | 0.27600190544611  | 4.67205049315649  |



|    |                  |                   |                   |
|----|------------------|-------------------|-------------------|
| H  | 7.83962233689489 | -1.37013645018962 | 4.30625659373537  |
| Eu | 0.06538823871447 | 0.13661342815131  | -0.53874395237134 |
